# Supplementary material for: Synthesis and molecular modeling studies of cholinesterase inhibitor dispiro[indoline-3,2′-pyrrolidine-3′,3′′-pyrrolidines]
Source: Royal Society of Chemistry journal article supplement (doi:10.1039/d0ra03064c), 2020-01-01
Supplement: d0ra03064c1.pdf [file d0ra03064c1.pdf]

## Synthesis and molecular modeling studies of cholinesterase inhibitor dispiro[indoline-3,2'-pyrrolidine-3',3''-pyrrolidines]

M. Adel Youssef,<sup>a</sup> Siva S. Panda,<sup>b</sup> Riham A. El-Shiekh,<sup>c</sup> ElSayed M. Shalaby,<sup>d</sup> Dalia R. Aboshouk,<sup>e</sup> Walid Fayad,<sup>f</sup> Nehmedo G. Fawzy<sup>e</sup> and Adel S. Girgis<sup>\*e</sup>

<sup>a</sup> *Department of Chemistry, Faculty of Science, Helwan University, Helwan, Egypt*

<sup>b</sup> *Department of Chemistry and Physics, Augusta University, Augusta, GA 30912, USA*

<sup>c</sup> *Department of Pharmacognosy, Faculty of Pharmacy, Cairo University, Cairo 11562, Egypt*

<sup>d</sup> *X-Ray Crystallography Lab., Physics Division, National Research Centre, Dokki, Giza 12622, Egypt*

<sup>e</sup> *Department of Pesticide Chemistry, National Research Centre, Dokki, Giza 12622, Egypt*

<sup>f</sup> *Drug Bioassay-Cell Culture Laboratory, Pharmacognosy Department, National Research Centre, Dokki, Giza, 12622, Egypt*

\*E-mail: [girgisas10@yahoo.com](mailto:girgisas10@yahoo.com)

### Supplementary material

#### Table titles

**Table S1.** Crystal data and structure refinement parameters for compound **8c**.

**Table S2.** Bond lengths (Å) of compound **8c**.

**Table S3.** Bond angles (°) for compound **8c**.

**Table S4.** Descriptor of the BMLR-QSAR model for the tested compounds as AChE inhibitors.

**Table S5.** Observed and estimated activity values for the tested compounds as AChE inhibitors according to the BMLR-QSAR model.

**Table S6.** Molecular descriptor values of the BMLR-QSAR model for the synthesized compounds as AChE inhibitors.

**Table S7.** Descriptor of the BMLR-QSAR model for the tested compounds as BChE inhibitors.

**Table S8.** Observed and estimated activity values for the tested compounds as BChE inhibitors according to the BMLR-QSAR model.

**Table S9.** Molecular descriptor values of the BMLR-QSAR model for the synthesized compounds as BChE inhibitors.

**Table S10.** Observed and estimated activity values for the tested compounds **8a–l** as AChE inhibitors according to the 3D-pharmacophore model.

**Table S11.** Observed and estimated activity values for the tested compounds **8a–l** as BChE inhibitors according to the 3D-pharmacophore model.

### Figure captions

**Fig. S1.** IR spectrum of compound **8a** (KBr pellet).

**Fig. S2.**  $^1\text{H-NMR}$  spectrum of compound **8a** in  $\text{DMSO-}d_6$ .

**Fig. S3.**  $^{13}\text{C-NMR}$  spectrum of compound **8a** in  $\text{DMSO-}d_6$ .

**Fig. S4.** IR spectrum of compound **8b** (KBr pellet).

**Fig. S5.**  $^1\text{H-NMR}$  spectrum of compound **8b** in  $\text{DMSO-}d_6$ .

**Fig. S6.**  $^{13}\text{C-NMR}$  spectrum of compound **8b** in  $\text{DMSO-}d_6$ .

**Fig. S7.** HSQC spectrum of compound **8b** in  $\text{DMSO-}d_6$ .

**Fig. S8.** IR spectrum of compound **8c** (KBr pellet).

**Fig. S9.**  $^1\text{H-NMR}$  spectrum of compound **8c** in  $\text{DMSO-}d_6$ .

**Fig. S10.**  $^{13}\text{C-NMR}$  spectrum of compound **8c** in  $\text{DMSO-}d_6$ .

**Fig. S11.** IR spectrum of compound **8d** (KBr pellet).

**Fig. S12.**  $^1\text{H-NMR}$  spectrum of compound **8d** in  $\text{DMSO-}d_6$ .

**Fig. S13.**  $^{13}\text{C-NMR}$  spectrum of compound **8d** in  $\text{DMSO-}d_6$ .

**Fig. S14.** IR spectrum of compound **8e** (KBr pellet).

**Fig. S15.**  $^1\text{H-NMR}$  spectrum of compound **8e** in  $\text{DMSO-}d_6$ .

**Fig. S16.**  $^{13}\text{C-NMR}$  spectrum of compound **8e** in  $\text{DMSO-}d_6$ .

**Fig. S17.** IR spectrum of compound **8f** (KBr pellet).

**Fig. S18.**  $^1\text{H-NMR}$  spectrum of compound **8f** in  $\text{DMSO-}d_6$ .

**Fig. S19.**  $^{13}\text{C-NMR}$  spectrum of compound **8f** in  $\text{DMSO-}d_6$ .

**Fig. S20.** IR spectrum of compound **8g** (KBr pellet).

**Fig. S21.**  $^1\text{H-NMR}$  spectrum of compound **8g** in  $\text{DMSO-}d_6$ .

**Fig. S22.**  $^{13}\text{C-NMR}$  spectrum of compound **8g** in  $\text{DMSO-}d_6$ .

**Fig. S23.** HSQC spectrum of compound **8g** in  $\text{DMSO-}d_6$ .

**Fig. S24.** IR spectrum of compound **8h** (KBr pellet).

**Fig. S25.**  $^1\text{H-NMR}$  spectrum of compound **8h** in  $\text{DMSO-}d_6$ .

**Fig. S26.**  $^{13}\text{C-NMR}$  spectrum of compound **8h** in  $\text{DMSO-}d_6$ .

**Fig. S27.** IR spectrum of compound **8i** (KBr pellet).

**Fig. S28.**  $^1\text{H-NMR}$  spectrum of compound **8i** in  $\text{DMSO-}d_6$ .

**Fig. S29.**  $^{13}\text{C-NMR}$  spectrum of compound **8i** in  $\text{DMSO-}d_6$ .

**Fig. S30.** IR spectrum of compound **8j** (KBr pellet).

**Fig. S31.**  $^1\text{H-NMR}$  spectrum of compound **8j** in  $\text{DMSO-}d_6$ .

**Fig. S32.**  $^{13}\text{C-NMR}$  spectrum of compound **8j** in  $\text{DMSO-}d_6$ .

**Fig. S33.** IR spectrum of compound **8k** (KBr pellet).

**Fig. S34.**  $^1\text{H-NMR}$  spectrum of compound **8k** in  $\text{DMSO-}d_6$ .

**Fig. S35.**  $^{13}\text{C-NMR}$  spectrum of compound **8k** in  $\text{DMSO-}d_6$ .

**Fig. S36.** IR spectrum of compound **8l** (KBr pellet).

**Fig. S37.**  $^1\text{H-NMR}$  spectrum of compound **8l** in  $\text{DMSO-}d_6$ .

**Fig. S38.**  $^{13}\text{C-NMR}$  spectrum of compound **8l** in  $\text{DMSO-}d_6$ .

**Fig. S39.** Dose-response curve for the tested compounds against RPE1 (retinal pigment epithelium) cell line.

**Fig. S40.** BMLR-QSAR model plot of correlations representing the observed vs. predicted  $\log/(\text{IC}_{50}, \mu\text{M})$  values for the tested compounds as AChE inhibitor (compound **8d** is an outlier).

**Fig. S41.** BMLR-QSAR model plot of correlations representing the observed vs. predicted  $\log/(\text{IC}_{50}, \mu\text{M})$  values for the tested compounds as BChE inhibitor.

**Fig. S42. (A)** Constraint distances “H-1 – H-2 = 6.872, H-1 – PosIon = 5.599, H-1 – HBA = 5.148, H-2 – HBA = 4.747, H-2 – PosIon = 8.062, HBA – PosIon = 3.514 Å”;

**(B)** Constraint angles “H-1 – H-2 – PosIon = 43.12, H-2 – H-1 – HBA = 43.65, HBA – H-1 – PosIon = 37.87 °” of the generated 3D-pharmacophore for the tested compounds

**8a-l** as AChE inhibitor which contains two hydrophobics (H-1, H-2; light blue), one hydrogen bonding acceptor (HBA; green) and one positive ionizable (PosIon; red).

**Fig. S43.** 3D-pharmacophore model mapped on the tested compounds **8a-l** as AChE inhibitor.

**Fig. S44. (A)** Constraint distances “H – HBA = 4.695, H – HBD = 7.860, HBA – HBD = 3.326 Å”; **(B)** Constraint angle “H – HBD – HBA = 13.64 °” of the generated 3D-pharmacophore for the tested compounds **8a-l** as BChE inhibitor which contains one hydrophobic (H; light blue), one hydrogen bonding acceptor (HBA; green) and one hydrogen bonding donor (HBD; purple).

**Fig. S45.** 3D-pharmacophore model mapped on the tested compounds **8a-l** as BChE inhibitor.



### Single crystal X-ray studies

Suitable colorless single crystals of compound **8c** were selected for X-ray diffraction analysis. The X-ray diffraction data were collected at room temperature (298 K) on an Enraf-Nonius 590 diffractometer with a Kappa CCD detector using graphite monochromated Mo- $K\alpha$  ( $\lambda = 0.71073\text{\AA}$ ) radiation.<sup>1</sup> Reflection data has been recorded in the rotation mode using the  $\phi$  and  $\omega$  scan technique with  $2\theta_{\text{max}} = 27.912$ . In absence of significant anomalous scattering, Friedel pairs have been merged. Changes in illuminated volume were kept to a minimum, and were taken into account by the multi-scan inter-frame scaling.<sup>2,3</sup> Unit cell parameters were determined from least-squares refinement with  $\theta$  in the range  $3 \leq \theta \leq 27$ . The structure was solved using *SUPERFLIP*<sup>4</sup> implemented in *CRYSTALS* program suit.<sup>5</sup> The refinement was carried out by full-matrix least-squares method on the positional and anisotropic temperature parameters of all non-hydrogen atoms based on  $F^2$  using *CRYSTALS* package. All hydrogen atoms were positioned geometrically and were initially refined with soft restraints on the bond lengths and angles to regularize their geometry (C—H in the range 0.93–0.98 and N—H in the range 0.86–0.89) and  $U_{\text{iso}}(\text{H})$  (in the range 1.2–1.5 times  $U_{\text{eq}}$  of the parent atom). Then, the positions were refined with riding constraints.<sup>6</sup> The general-purpose crystallographic tool *PLATON*<sup>7</sup> was used for the structure analysis and presentation of the results. *ORTEP-3* for Windows<sup>8</sup> and *MERCURY*<sup>9</sup> programs were used for molecular graphics. Details of the data collection conditions and the parameters of the refinement process for compound **8c** are given in Table S1.

### Molecular modeling studies

The synthesized dispiro[indoline-3,2'-pyrrolidine-3',3''-pyrrolidines] **8a-l** revealing variable AChE and BChE inhibitory properties were utilized for developing the 2D-QSAR modeling by CODESSA-Pro (comprehensive descriptors for structural and statistical analysis) software. Geometry of the compounds was initially optimized by AM1 technique using hyperChem 8.0 then, uploaded to CODESSA-Pro for final geometrical structure optimization by MOPAC.<sup>10-12</sup> CODESSA-Pro calculated 656 molecular descriptors (constitutional, topological, geometrical, charge-related, semi-empirical, thermodynamical, molecular-type, atomic-type and bond-type descriptors) for

the exported bio-active agents. Mathematical transformation of the experimental values [including  $IC_{50}$ ,  $1/IC_{50}$ ,  $\log(IC_{50})$  and  $1/\log(IC_{50}) \mu M$ ] were used searching for the best QSAR model. The best multi-linear regression (BMLR) technique was utilized which is a stepwise search for the best  $n$ -parameter regression equations (where  $n$  stands for the number of descriptors used), based on the highest  $R^2$  (squared correlation coefficient),  $R^2cvOO$  (squared cross-validation “leave one-out, LOO” coefficient),  $R^2cvMO$  (squared cross-validation “leave many-out up to 20% of the training set, LMO” coefficient),  $F$  (Fisher statistical significance criteria) values, and  $s^2$  (standard deviation). The QSAR up to 3-descriptor model describing the biological activity of the bio-active agents were generated (obeying the thumb rule of 4:1 which is the ratio between the data points and the number of QSAR descriptor).

Minimum ( $>0.1$ ) bond order for atom C is an atomic type descriptor with the highest coefficient value (466.922) among all the descriptors of AChE model. This is why the higher descriptor value, the lower AChE inhibitory efficacy of the tested agent as shown in compounds **8a** and **8e** (descriptor value = 0.10497, 0.10232 with estimated  $IC_{50}$  value = 129.99, 3.25  $\mu M$  for compounds **8a** and **8e**, respectively). HA dependent HDCA-2/SQRT(TMSA) (MOPAC PC) is a charge related descriptor with relatively high coefficient value (85.5021). Compounds with high descriptor value predicted low AChE property and vice versa as shown for compounds **8a** and **8e** (descriptor value = 0.1247, 0.11715). HDCA2 (area weighed surface charge of hydrogen bonding donor atoms) can be calculated by equ. (1).<sup>13</sup>

$$HDCA2 = \sum_D \frac{q_D \sqrt{S_D}}{\sqrt{S_{tot}}} \quad D \in H_{H-donor} \dots\dots\dots (1)$$

Where,  $S_D$  stands for the solvent accessible surface area of H-bonding donor H atoms (selected by threshold charge),  $q_D$  is the partial charge on H-bonding donor H atoms (selected by threshold charge) and  $S_{tot}$  is the total solvent accessible molecular surface area.

Square root of surface area for atom C is also a charge related descriptor with negative sign coefficient value (-0.164864). For this reason, the higher descriptor value of an agent, the higher predicted AChE inhibitory activity and vice versa as revealed by

compounds **8c** and **8e** (descriptor value = 55.9192, 57.81774 corresponding to predicted  $IC_{50} = 84.39, 3.25 \mu\text{M}$  for compounds **8c** and **8e**, respectively). Atomic charge weighed partial positively and negatively charged surface area can be calculated by equs. (2) and (3), respectively.<sup>13</sup>

$$PPSA3 = \sum_A q_A \cdot S_A \quad A \in \{\delta_A > 0\} \dots\dots\dots (2)$$

$$PNSA3 = \sum_A q_A \cdot S_A \quad A \in \{\delta_A < 0\} \dots\dots\dots (3)$$

Where,  $S_A$  is the positively/negatively charged solvent accessible atomic surface area and  $q_A$  is the atomic partial charge.

ZX Shadow/ZX rectangle is a geometrical descriptor with the highest coefficient value (10.5556) among all the 3 descriptor BChE model. The higher descriptor value of an agent the lower potency of the molecule as shown by compounds **8c** and **8e** (descriptor value = 0.68051, 0.59553 corresponding to estimated properties = 64.31, 4.77 for compounds **8c** and **8e**, respectively). Relative shadow areas of a molecule can be determined by equ. (4).<sup>13</sup>

$$S_k^r = \frac{\int_C (vdp - \rho dv)}{S^{(k)}} \dots\dots\dots (4)$$

Where,  $C$  is contour of the projection of the molecule on the plane defined by two principal axes of the molecule ( $k = XY, XZ$  or  $YZ$  plane),  $v$  - $x$  or  $y$ ,  $\rho$  - $y$  or  $z$ ,  $S^{(k)} = X \cdot Y; X \cdot Z$  or  $Y \cdot Z$ .

Maximum atomic state energy for atom O is an atomic type descriptor. It is the second highest coefficient value of the model (2.22981). Again the higher descriptor value of an agent the lower potency of the molecule as shown by compounds **8a** and **8e** (descriptor value = 308.443, 308.2474 corresponding to estimated properties = 68.95, 4.77 for compounds **8a** and **8e**, respectively). Shadow plane XY is a molecular type descriptor with lowest coefficient value of the model (0.0220702). Its effect is the same similar to the previously mentioned BChE descriptor model for the potency of the

molecule as shown by compounds **8c** and **8e** (descriptor value = 107.2, 96.96 for compounds **8c** and **8e**, respectively).

## References

- 1 R. W. W. Hooft, Collect: Data collection software, Nonius BV, Delft, The Netherlands, 1998.
- 2 C. Görbitz, What is the best crystal size for collection of X-ray data? Refinement of the structure of glycyl-L-serine based on data from a very large crystal, *Acta Crystallogr. B.*, 1999, **55**, 1090–1098.
- 3 Z. Otwinowski, W. Minor, Processing of X-ray Diffraction Data Collected in Oscillation Mode, in *Methods in Enzymology*, vol. 27, C.W. Carter, Jr. Sweet, Eds., New York Academic Press, 1997.
- 4 L. Palatinus and G. Chapuis, SUPERFLIP – a computer program for the solution of crystal structures by charge flipping in arbitrary dimensions, *J. Appl. Cryst.*, 2007, **40**, 786–790.
- 5 P. W. Betteridge, J. R. Carruthers, R. I. Cooper, K. Prout and D. J. Watkin, CRYSTALS version 12: software for guided crystal structure analysis, *J. Appl. Crystallogr.*, 2003, **36**, 1487.
- 6 R. I. Cooper, A. L. Thompson and D. J. Watkin, CRYSTALS enhancements: dealing with hydrogen atoms in refinement, *J. Appl. Crystallogr.*, 2010, **43**, 1100–1107.
- 7 A. L. Spek, Structure validation in chemical crystallography, *Acta Crystallogr. Sect. D Biol. Crystallogr.*, 2009, **65**, 148–155.
- 8 L. J. Farrugia, ORTEP -3 for Windows - a version of ORTEP -III with a Graphical User Interface (GUI), *J. Appl. Crystallogr.*, 1997, **30**, 565–565.
- 9 C. F. Macrae, I. J. Bruno, J. A. Chisholm, P. R. Edgington, P. McCabe, E. Pidcock, L. Rodriguez-Monge, R. Taylor, J. van de Streek and P. A. Wood, Mercury CSD 2.0 – new features for the visualization and investigation of crystal structures, *J. Appl. Crystallogr.*, 2008, **41**, 466–470.
- 10 I. A. Seliem, S. S. Panda, A. S. Girgis, Y. I. Nagy, R. F. George, W. Fayad, N. G. Fawzy, T. S. Ibrahim, A. M. M. Al-Mahmoudy, R. Sakhuja and Z. K. M. Abdel-

- samii, Design, synthesis, antimicrobial and DNA gyrase inhibitory properties of fluoroquinolone-dichloroacetic acid hybrids, *Chem. Biol. Drug Des.*, 2020, **95**, 248–259.
- 11 N. G. Fawzy, S. S. Panda, W. Fayad, E. M. Shalaby, A. M. Srour and A. S. Girgis, Synthesis, human topoisomerase II $\alpha$  inhibitory properties and molecular modeling studies of anti-proliferative curcumin mimics, *RSC Adv.*, 2019, **9**, 33761–33774.
  - 12 A. R. Katritzky, A. S. Girgis, S. Slavov, S. R. Tala and I. Stoyanova-Slavova, QSAR modeling, synthesis and bioassay of diverse leukemia RPMI-8226 cell line active agents, *Eur. J. Med. Chem.*, 2010, **45**, 5183–5199.
  - 13 A. R. Katritzky, R. Petrukhin, I. Petrukhina, A. Lomaka, D. B. Tatham and M. Karelson, CODESSA-Pro software manual 2005, pp. 48, 54, 63.

**Table S1.** Crystal data and structure refinement parameters for compound **8c**.

|                                                                                                                |                                                                 |
|----------------------------------------------------------------------------------------------------------------|-----------------------------------------------------------------|
| Chemical formula                                                                                               | C <sub>28</sub> H <sub>24</sub> N <sub>3</sub> O <sub>4</sub>   |
| <i>Mr</i>                                                                                                      | 466.52                                                          |
| Crystal system, space group                                                                                    | Monoclinic, <i>P2<sub>1</sub>/c</i>                             |
| Temperature (K)                                                                                                | 298                                                             |
| <i>a</i> , <i>b</i> , <i>c</i> (Å)                                                                             | 6.2910 (5), 16.2664 (11), 23.223 (2)                            |
| β (°)                                                                                                          | 100.00 (18)                                                     |
| <i>V</i> (Å <sup>3</sup> )                                                                                     | 2340.4 (13)                                                     |
| <i>Z</i>                                                                                                       | 4                                                               |
| Radiation type                                                                                                 | Mo <i>K</i> α                                                   |
| μ (mm <sup>-1</sup> )                                                                                          | 0.09                                                            |
| Diffractometer                                                                                                 | Nonius KappaCCD                                                 |
| Absorption correction                                                                                          | Multi-scan <i>DENZO/SCALEPACK</i><br>(Otwinowski & Minor, 1997) |
| <i>T</i> <sub>min</sub> , <i>T</i> <sub>max</sub>                                                              | 1.00, 1.00                                                      |
| No. of measured, independent and<br>observed [ <i>I</i> > 2.0σ( <i>I</i> )] reflections                        | 5196, 5196, 1340                                                |
| (sin θ/λ) <sub>max</sub> (Å <sup>-1</sup> )                                                                    | 0.659                                                           |
| <i>R</i> [ <i>F</i> <sup>2</sup> > 2σ( <i>F</i> <sup>2</sup> )], <i>wR</i> ( <i>F</i> <sup>2</sup> ), <i>S</i> | 0.115, 0.042, 1.06                                              |
| No. of reflections                                                                                             | 1340                                                            |
| No. of parameters                                                                                              | 316                                                             |
| Δρ <sub>max</sub> , Δρ <sub>min</sub> (e Å <sup>-3</sup> )                                                     | 0.56, -0.64                                                     |
| CCDC Number                                                                                                    | CCDC 1988241                                                    |

**Table S2.** Bond lengths (Å) of compound **8c**.

| Geometric parameters | Bond lengths (Å) | Geometric parameters | Bond lengths (Å) |
|----------------------|------------------|----------------------|------------------|
| O1—C2                | 1.224 (9)        | C16—C17              | 1.392 (11)       |
| C2—N3                | 1.408 (9)        | C17—C18              | 1.327 (12)       |
| C2—C13               | 1.484 (12)       | C18—C19              | 1.390 (12)       |
| N3—C4                | 1.436 (9)        | C19—C20              | 1.391 (11)       |
| N3—C10               | 1.363 (9)        | C21—N22              | 1.488 (10)       |
| C4—C5                | 1.363 (11)       | N22—C23              | 1.459 (8)        |
| C4—C9                | 1.387 (9)        | N22—C35              | 1.497 (9)        |
| C5—C6                | 1.407 (12)       | C23—C24              | 1.617 (10)       |
| C6—C7                | 1.382 (12)       | C23—C28              | 1.526 (11)       |
| C7—C8                | 1.344 (12)       | C24—O25              | 1.202 (9)        |
| C8—C9                | 1.375 (12)       | C24—N26              | 1.364 (10)       |
| C10—O11              | 1.219 (8)        | N26—C27              | 1.440 (11)       |
| C10—C12              | 1.582 (11)       | C27—C28              | 1.414 (10)       |
| C12—C13              | 1.523 (9)        | C27—C34              | 1.342 (12)       |
| C12—C14              | 1.555 (10)       | C28—C29              | 1.415 (11)       |
| C12—C23              | 1.589 (10)       | C29—C30              | 1.358 (11)       |
| C14—C15              | 1.515 (10)       | C30—O31              | 1.420 (10)       |
| C14—C21              | 1.513 (9)        | C30—C33              | 1.392 (10)       |
| C15—C16              | 1.422 (11)       | O31—C32              | 1.440 (9)        |
| C15—C20              | 1.364 (10)       | C33—C34              | 1.396 (12)       |

**Table S3.** Bond angles (°) for compound **8c**.

| Geometric parameters | Bond angles (°) | Geometric parameters | Bond angles (°) |
|----------------------|-----------------|----------------------|-----------------|
| O1—C2—N3             | 122.1 (8)       | C16—C17—C18          | 118.8 (9)       |
| O1—C2—C13            | 126.0 (8)       | C17—C18—C19          | 122.9 (9)       |
| N3—C2—C13            | 111.7 (7)       | C18—C19—C20          | 117.9 (8)       |
| C2—N3—C4             | 126.5 (6)       | C19—C20—C15          | 122.0 (8)       |
| C2—N3—C10            | 110.5 (7)       | C14—C21—N22          | 102.8 (6)       |
| C4—N3—C10            | 123.0 (6)       | C21—N22—C23          | 103.0 (6)       |

|             |           |             |           |
|-------------|-----------|-------------|-----------|
| N3—C4—C5    | 119.2 (7) | C21—N22—C35 | 113.0 (6) |
| N3—C4—C9    | 123.0 (7) | C23—N22—C35 | 114.3 (5) |
| C5—C4—C9    | 117.7 (8) | C12—C23—N22 | 103.4 (5) |
| C4—C5—C6    | 120.2 (8) | C12—C23—C24 | 109.9 (6) |
| C5—C6—C7    | 120.8 (9) | N22—C23—C24 | 110.7 (6) |
| C6—C7—C8    | 118.3 (9) | C12—C23—C28 | 118.5 (6) |
| C7—C8—C9    | 121.4 (8) | N22—C23—C28 | 110.5 (6) |
| C4—C9—C8    | 121.5 (8) | C24—C23—C28 | 103.9 (6) |
| N3—C10—O11  | 124.8 (7) | C23—C24—O25 | 127.4 (7) |
| N3—C10—C12  | 108.3 (6) | C23—C24—N26 | 105.6 (7) |
| O11—C10—C12 | 126.9 (7) | O25—C24—N26 | 127.0 (7) |
| C10—C12—C13 | 103.5 (6) | C24—N26—C27 | 112.4 (7) |
| C10—C12—C14 | 109.2 (5) | N26—C27—C28 | 111.3 (7) |
| C13—C12—C14 | 118.6 (6) | N26—C27—C34 | 128.2 (9) |
| C10—C12—C23 | 108.2 (6) | C28—C27—C34 | 120.0 (8) |
| C13—C12—C23 | 114.7 (5) | C23—C28—C27 | 106.7 (6) |
| C14—C12—C23 | 102.4 (6) | C23—C28—C29 | 133.2 (7) |
| C12—C13—C2  | 104.1 (6) | C27—C28—C29 | 120.0 (8) |
| C12—C14—C15 | 119.0 (5) | C28—C29—C30 | 118.7 (8) |
| C12—C14—C21 | 105.5 (6) | C29—C30—O31 | 123.6 (8) |
| C15—C14—C21 | 111.3 (6) | C29—C30—C33 | 120.7 (9) |
| C14—C15—C16 | 123.0 (7) | O31—C30—C33 | 115.7 (8) |
| C14—C15—C20 | 119.8 (7) | C30—O31—C32 | 119.9 (7) |
| C16—C15—C20 | 117.2 (8) | C30—C33—C34 | 120.5 (8) |
| C15—C16—C17 | 121.0 (8) | C33—C34—C27 | 119.8 (8) |

**Table S4.** Descriptor of the BMLR-QSAR model for the tested compounds as AChE inhibitors.

| Entry | ID    | Coefficient | <i>s</i> | <i>t</i> | Descriptor                        |
|-------|-------|-------------|----------|----------|-----------------------------------|
| 1     | 0     | -47.747     | 5.290    | -9.026   | Intercept                         |
| 2     | $D_1$ | 466.922     | 52.917   | 8.824    | Min. (>0.1) bond order for atom C |



|   |       |           |        |        |                                               |
|---|-------|-----------|--------|--------|-----------------------------------------------|
| 3 | $D_2$ | 85.5021   | 11.191 | 7.640  | HA dependent HDCA-<br>2/SQRT(TMSA) (MOPAC PC) |
| 4 | $D_3$ | -0.164864 | 0.027  | -6.179 | Square root of surface area for<br>atom C     |

$N = 12, n = 3, R^2 = 0.923, R^2_{cvOO} = 0.882, R^2_{cvMO} = 0.904, F = 31.948, s^2 = 0.026$

$\log(\text{IC}_{50}, \mu\text{M}) = -47.747 + (466.922 \times D_1) + (85.5021 \times D_2) - (0.164864 \times D_3)$

**Table S5.** Observed and estimated activity values for the tested compounds as AChE inhibitors according to the BMLR-QSAR model.

| Entry | Compd.    | Observed                            | Observed                      | Estimated                           | Estimated                     | Error <sup>a</sup> |
|-------|-----------|-------------------------------------|-------------------------------|-------------------------------------|-------------------------------|--------------------|
|       |           | $\log(\text{IC}_{50}, \mu\text{M})$ | $\text{IC}_{50}, \mu\text{M}$ | $\log(\text{IC}_{50}, \mu\text{M})$ | $\text{IC}_{50}, \mu\text{M}$ |                    |
| 1     | <b>8a</b> | 2.06662                             | 116.58                        | 2.1139                              | 129.99                        | -13.41             |
| 2     | <b>8b</b> | 1.13354                             | 13.6                          | 1.12937                             | 13.47                         | 0.13               |
| 3     | <b>8c</b> | 2.01237                             | 102.89                        | 1.92628                             | 84.39                         | 18.50              |
| 4     | <b>8d</b> | 1.38561                             | 24.3                          | 1.01604                             | 10.38                         | 13.92              |
| 5     | <b>8e</b> | 0.525045                            | 3.35                          | 0.512188                            | 3.25                          | 0.10               |
| 6     | <b>8f</b> | 1.08814                             | 12.25                         | 1.03874                             | 10.93                         | 1.32               |
| 7     | <b>8g</b> | 0.498311                            | 3.15                          | 0.693192                            | 4.93                          | -1.78              |
| 8     | <b>8h</b> | 0.797268                            | 6.27                          | 0.863375                            | 7.30                          | -1.03              |
| 9     | <b>8i</b> | 1.59561                             | 39.41                         | 1.63445                             | 43.10                         | -3.69              |
| 10    | <b>8j</b> | 1.32181                             | 20.98                         | 1.3381                              | 21.78                         | -0.80              |
| 11    | <b>8k</b> | 1.14395                             | 13.93                         | 1.16877                             | 14.75                         | -0.82              |
| 12    | <b>8l</b> | 1.34183                             | 21.97                         | 1.47568                             | 29.90                         | -7.93              |

<sup>a</sup> Error is the difference between the observed and estimated property values in  $\mu\text{M}$  values.

**Table S6.** Molecular descriptor values of the BMLR-QSAR model for the synthesized compounds as AChE inhibitors.

| Entry | Compd.    | Descriptors <sup>a</sup> |        |          |
|-------|-----------|--------------------------|--------|----------|
|       |           | $D_1$                    | $D_2$  | $D_3$    |
| 1     | <b>8a</b> | 0.10497                  | 0.1247 | 59.52144 |

|    |           |         |         |          |
|----|-----------|---------|---------|----------|
| 2  | <b>8b</b> | 0.10146 | 0.11974 | 52.98071 |
| 3  | <b>8c</b> | 0.10225 | 0.13039 | 55.9192  |
| 4  | <b>8d</b> | 0.10221 | 0.11744 | 54.61403 |
| 5  | <b>8e</b> | 0.10232 | 0.11715 | 57.81774 |
| 6  | <b>8f</b> | 0.10114 | 0.12772 | 56.75511 |
| 7  | <b>8g</b> | 0.10162 | 0.11903 | 55.71342 |
| 8  | <b>8h</b> | 0.10053 | 0.12459 | 54.48833 |
| 9  | <b>8i</b> | 0.10193 | 0.12444 | 53.67995 |
| 10 | <b>8j</b> | 0.10352 | 0.11458 | 54.88521 |
| 11 | <b>8k</b> | 0.10199 | 0.10763 | 47.96379 |
| 12 | <b>8l</b> | 0.10252 | 0.12131 | 54.69956 |

<sup>a</sup>  $D_1$  = Min. (>0.1) bond order for atom C,  $D_2$  = HA dependent HDCA-2/SQRT(TMSA) (MOPAC PC),  $D_3$  = Square root of Surface Area for atom C.

**Table S7.** Descriptor of the BMLR-QSAR model for the tested compounds as BChE inhibitors.

| Entry | ID    | Coefficient | <i>s</i> | <i>t</i> | Descriptor                          |
|-------|-------|-------------|----------|----------|-------------------------------------|
| 1     | 0     | -695.08     | 92.732   | -7.496   | Intercept                           |
| 2     | $D_1$ | 10.5556     | 0.655    | 16.119   | ZX Shadow / ZX Rectangle            |
| 3     | $D_2$ | 2.22981     | 0.301    | 7.400    | Max. atomic state energy for atom O |
| 4     | $D_3$ | 0.0220702   | 0.004    | 6.045    | Shadow plane XY                     |

$N = 12$ ,  $n = 3$ ,  $R^2 = 0.979$ ,  $R^2_{cvOO} = 0.936$ ,  $R^2_{cvMO} = 0.956$ ,  $F = 122.564$ ,  $s^2 = 0.005$

$\log(\text{IC}_{50}, \mu\text{M}) = -695.08 + (10.5556 \times D_1) + (2.22981 \times D_2) + (0.0220702 \times D_3)$

**Table S8.** Observed and estimated activity values for the tested compounds as BChE inhibitors according to the BMLR-QSAR model.

| Entry | Compd.    | Observed<br>$\log(\text{IC}_{50}, \mu\text{M})$ | Observed<br>$\text{IC}_{50}, \mu\text{M}$ | Estimated<br>$\log(\text{IC}_{50}, \mu\text{M})$ | Estimated<br>$\text{IC}_{50}, \mu\text{M}$ | Error <sup>a</sup> |
|-------|-----------|-------------------------------------------------|-------------------------------------------|--------------------------------------------------|--------------------------------------------|--------------------|
| 1     | <b>8a</b> | 1.91249                                         | 81.75                                     | 1.83852                                          | 68.95                                      | 12.80              |
| 2     | <b>8b</b> | 1.62788                                         | 42.45                                     | 1.69097                                          | 49.09                                      | -6.64              |

|    |           |          |       |          |       |       |
|----|-----------|----------|-------|----------|-------|-------|
| 3  | <b>8c</b> | 1.85582  | 71.75 | 1.80826  | 64.31 | 7.44  |
| 4  | <b>8d</b> | 1.32899  | 21.33 | 1.43514  | 27.24 | -5.91 |
| 5  | <b>8e</b> | 0.750508 | 5.63  | 0.678732 | 4.77  | 0.86  |
| 6  | <b>8f</b> | 1.3032   | 20.1  | 1.26066  | 18.22 | 1.88  |
| 7  | <b>8g</b> | 0.675778 | 4.74  | 0.731632 | 5.39  | -0.65 |
| 8  | <b>8h</b> | 0.727541 | 5.34  | 0.788595 | 6.15  | -0.81 |
| 9  | <b>8i</b> | 1.54555  | 35.12 | 1.58656  | 38.60 | -3.48 |
| 10 | <b>8j</b> | 1.1329   | 13.58 | 1.08186  | 12.07 | 1.51  |
| 11 | <b>8k</b> | 1.00945  | 10.22 | 0.960594 | 9.13  | 1.09  |
| 12 | <b>8l</b> | 1.55072  | 35.54 | 1.55929  | 36.25 | -0.71 |

<sup>a</sup> Error is the difference between the observed and estimated property values in  $\mu\text{M}$  values.

**Table S9.** Molecular descriptor values of the BMLR-QSAR model for the synthesized compounds as BChE inhibitors.

| Entry | Compd.    | Descriptors <sup>a</sup> |                |                |
|-------|-----------|--------------------------|----------------|----------------|
|       |           | D <sub>1</sub>           | D <sub>2</sub> | D <sub>3</sub> |
| 1     | <b>8a</b> | 0.66053                  | 308.443        | 98.66          |
| 2     | <b>8b</b> | 0.70783                  | 308.2048       | 93.42          |
| 3     | <b>8c</b> | 0.68051                  | 308.2503       | 107.2          |
| 4     | <b>8d</b> | 0.64082                  | 308.3275       | 101.48         |
| 5     | <b>8e</b> | 0.59553                  | 308.2474       | 96.96          |
| 6     | <b>8f</b> | 0.65798                  | 308.2169       | 96.54          |
| 7     | <b>8g</b> | 0.57674                  | 308.25         | 108.08         |
| 8     | <b>8h</b> | 0.60684                  | 308.2241       | 98.88          |
| 9     | <b>8i</b> | 0.64727                  | 308.312        | 106.82         |
| 10    | <b>8j</b> | 0.62421                  | 308.2081       | 105.48         |
| 11    | <b>8k</b> | 0.61271                  | 308.1816       | 108.16         |
| 12    | <b>8l</b> | 0.61341                  | 308.3524       | 117.7          |

<sup>a</sup>  $D_1 = ZX \text{ Shadow} / ZX \text{ Rectangle}$ ,  $D_2 = \text{Max. atomic state energy for atom O}$ ,  $D_3 = \text{Shadow plane XY}$ .

**Table S10.** Observed and estimated activity values for the tested compounds **8a–l** as AChE inhibitors according to the 3D-pharmacophore model.

| Entry | Compd.    | Observed<br>log(IC <sub>50</sub> , μM) | Observed IC <sub>50</sub> ,<br>μM | Estimated<br>log(IC <sub>50</sub> , μM) | Estimated IC <sub>50</sub> ,<br>μM |
|-------|-----------|----------------------------------------|-----------------------------------|-----------------------------------------|------------------------------------|
| 1     | <b>8a</b> | 2.06662                                | 116.6                             | 2.14848                                 | 140.8                              |
| 2     | <b>8b</b> | 1.13354                                | 13.6                              | 1.08505                                 | 12.2                               |
| 3     | <b>8c</b> | 2.01237                                | 102.9                             | 1.46648                                 | 29.3                               |
| 4     | <b>8d</b> | 1.38561                                | 24.3                              | 0.922511                                | 8.4                                |
| 5     | <b>8e</b> | 0.525045                               | 3.4                               | 0.805378                                | 6.4                                |
| 6     | <b>8f</b> | 1.08814                                | 12.3                              | 1.11632                                 | 13.1                               |
| 7     | <b>8g</b> | 0.498311                               | 3.2                               | 0.642735                                | 4.4                                |
| 8     | <b>8h</b> | 0.797268                               | 6.3                               | 0.982                                   | 9.6                                |
| 9     | <b>8i</b> | 1.59561                                | 39.4                              | 1.43479                                 | 27.2                               |
| 10    | <b>8j</b> | 1.32181                                | 21.0                              | 1.83182                                 | 67.9                               |
| 11    | <b>8k</b> | 1.14395                                | 13.9                              | 1.20337                                 | 16.0                               |
| 12    | <b>8l</b> | 1.34183                                | 22.0                              | 0.97118                                 | 9.4                                |

**Table S11.** Observed and estimated activity values for the tested compounds **8a–l** as BChE inhibitors according to the 3D-pharmacophore model.

| Entry | Compd.    | Observed<br>log(IC <sub>50</sub> , μM) | Observed IC <sub>50</sub> ,<br>μM | Estimated<br>log(IC <sub>50</sub> , μM) | Estimated IC <sub>50</sub> ,<br>μM |
|-------|-----------|----------------------------------------|-----------------------------------|-----------------------------------------|------------------------------------|
| 1     | <b>8a</b> | 1.91249                                | 81.8                              | 1.95644                                 | 90.5                               |
| 2     | <b>8b</b> | 1.62788                                | 42.5                              | 1.48946                                 | 30.9                               |
| 3     | <b>8c</b> | 1.85582                                | 71.7                              | 1.42828                                 | 26.8                               |
| 4     | <b>8d</b> | 1.32899                                | 21.3                              | 1.21379                                 | 16.4                               |
| 5     | <b>8e</b> | 0.750508                               | 5.6                               | 1.05258                                 | 11.3                               |
| 6     | <b>8f</b> | 1.3032                                 | 20.1                              | 1.11712                                 | 13.1                               |
| 7     | <b>8g</b> | 0.675778                               | 4.7                               | 0.998164                                | 10.0                               |
| 8     | <b>8h</b> | 0.727541                               | 5.3                               | 1.06305                                 | 11.6                               |
| 9     | <b>8i</b> | 1.54555                                | 35.1                              | 1.32427                                 | 21.1                               |
| 10    | <b>8j</b> | 1.1329                                 | 13.6                              | 0.975985                                | 9.5                                |

|    |           |         |      |         |      |
|----|-----------|---------|------|---------|------|
| 11 | <b>8k</b> | 1.00945 | 10.2 | 1.01392 | 10.3 |
| 12 | <b>8l</b> | 1.55072 | 35.5 | 1.12307 | 13.3 |

---

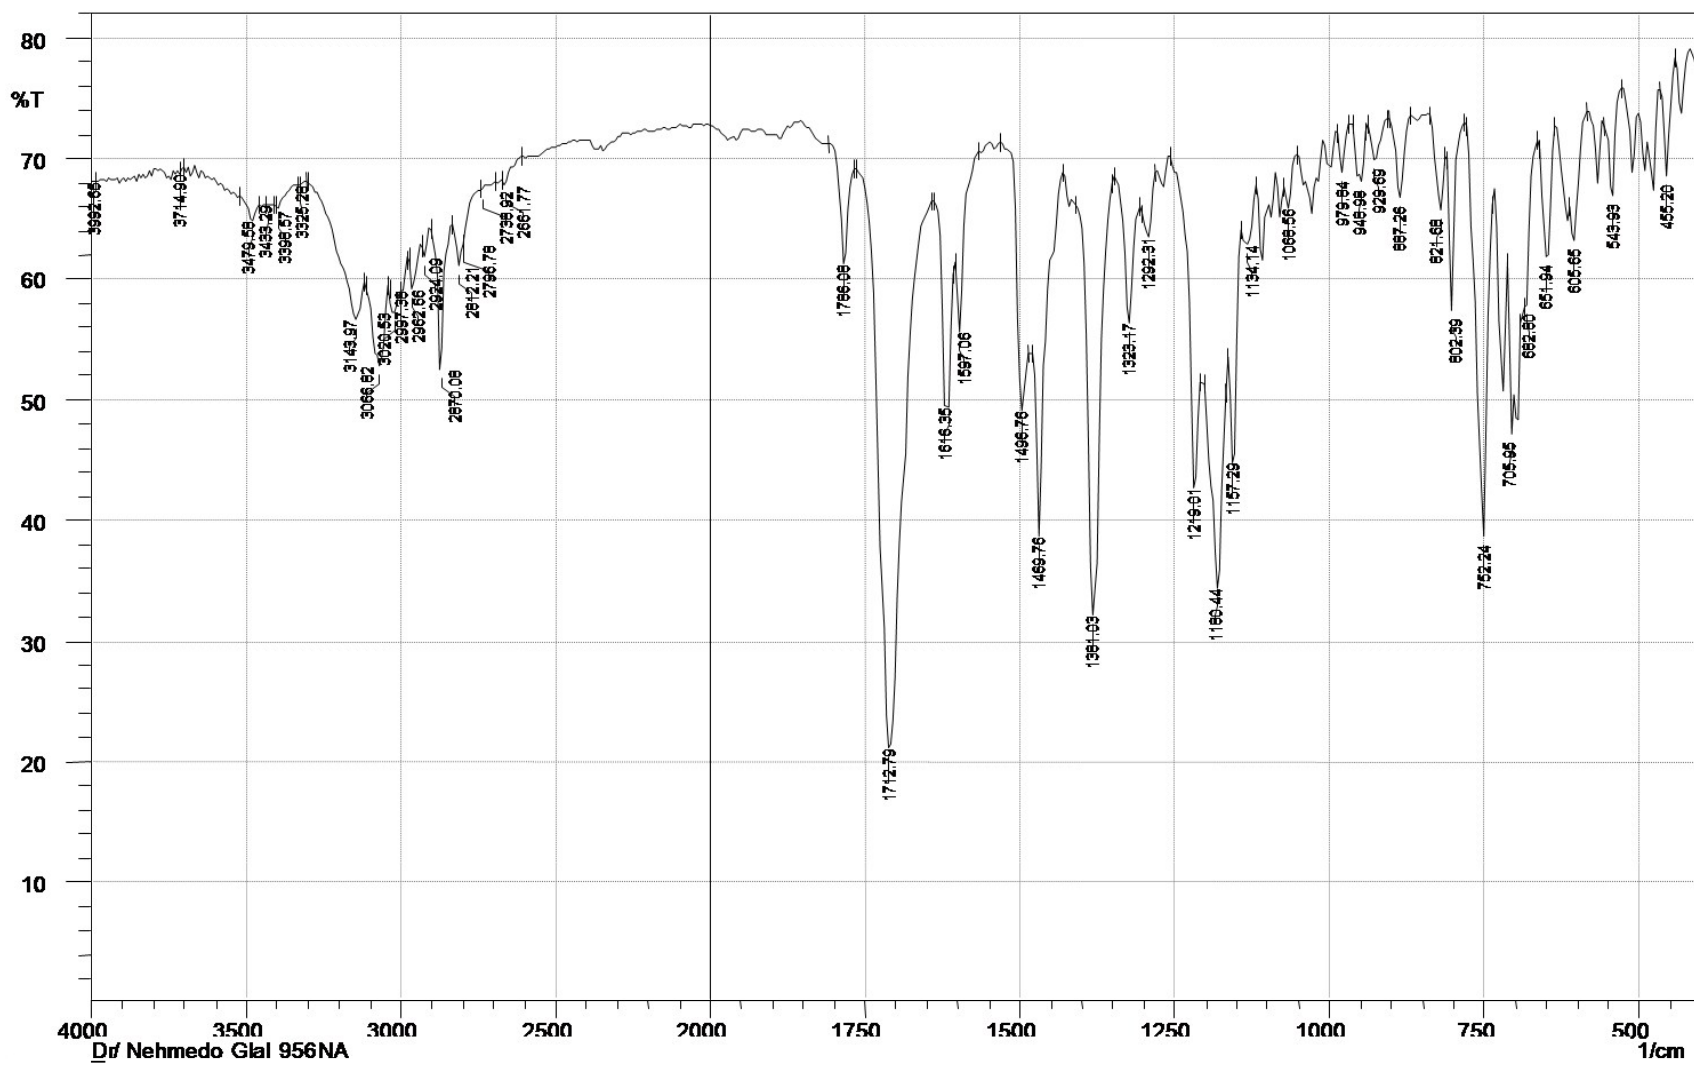

Fig. S1. IR spectrum of compound 8a (KBr pellet).

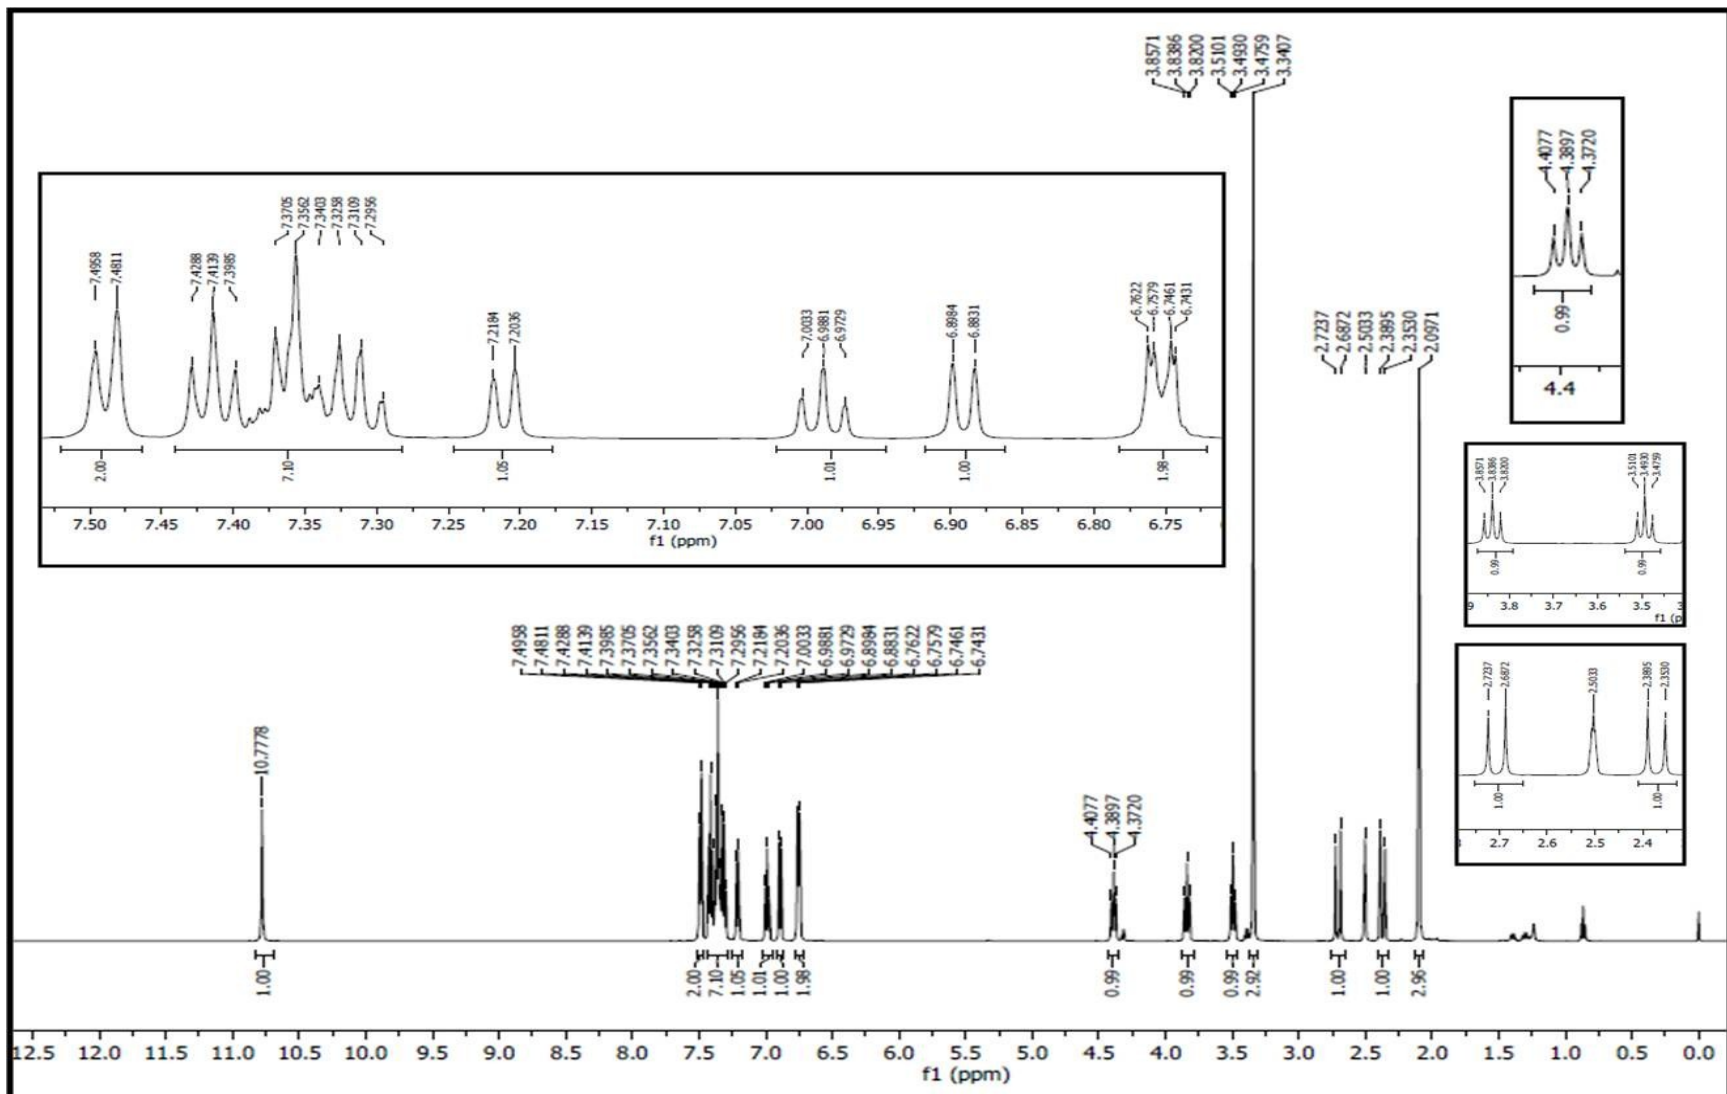

Fig. S2.  $^1\text{H-NMR}$  spectrum of compound **8a** in  $\text{DMSO-}d_6$ .

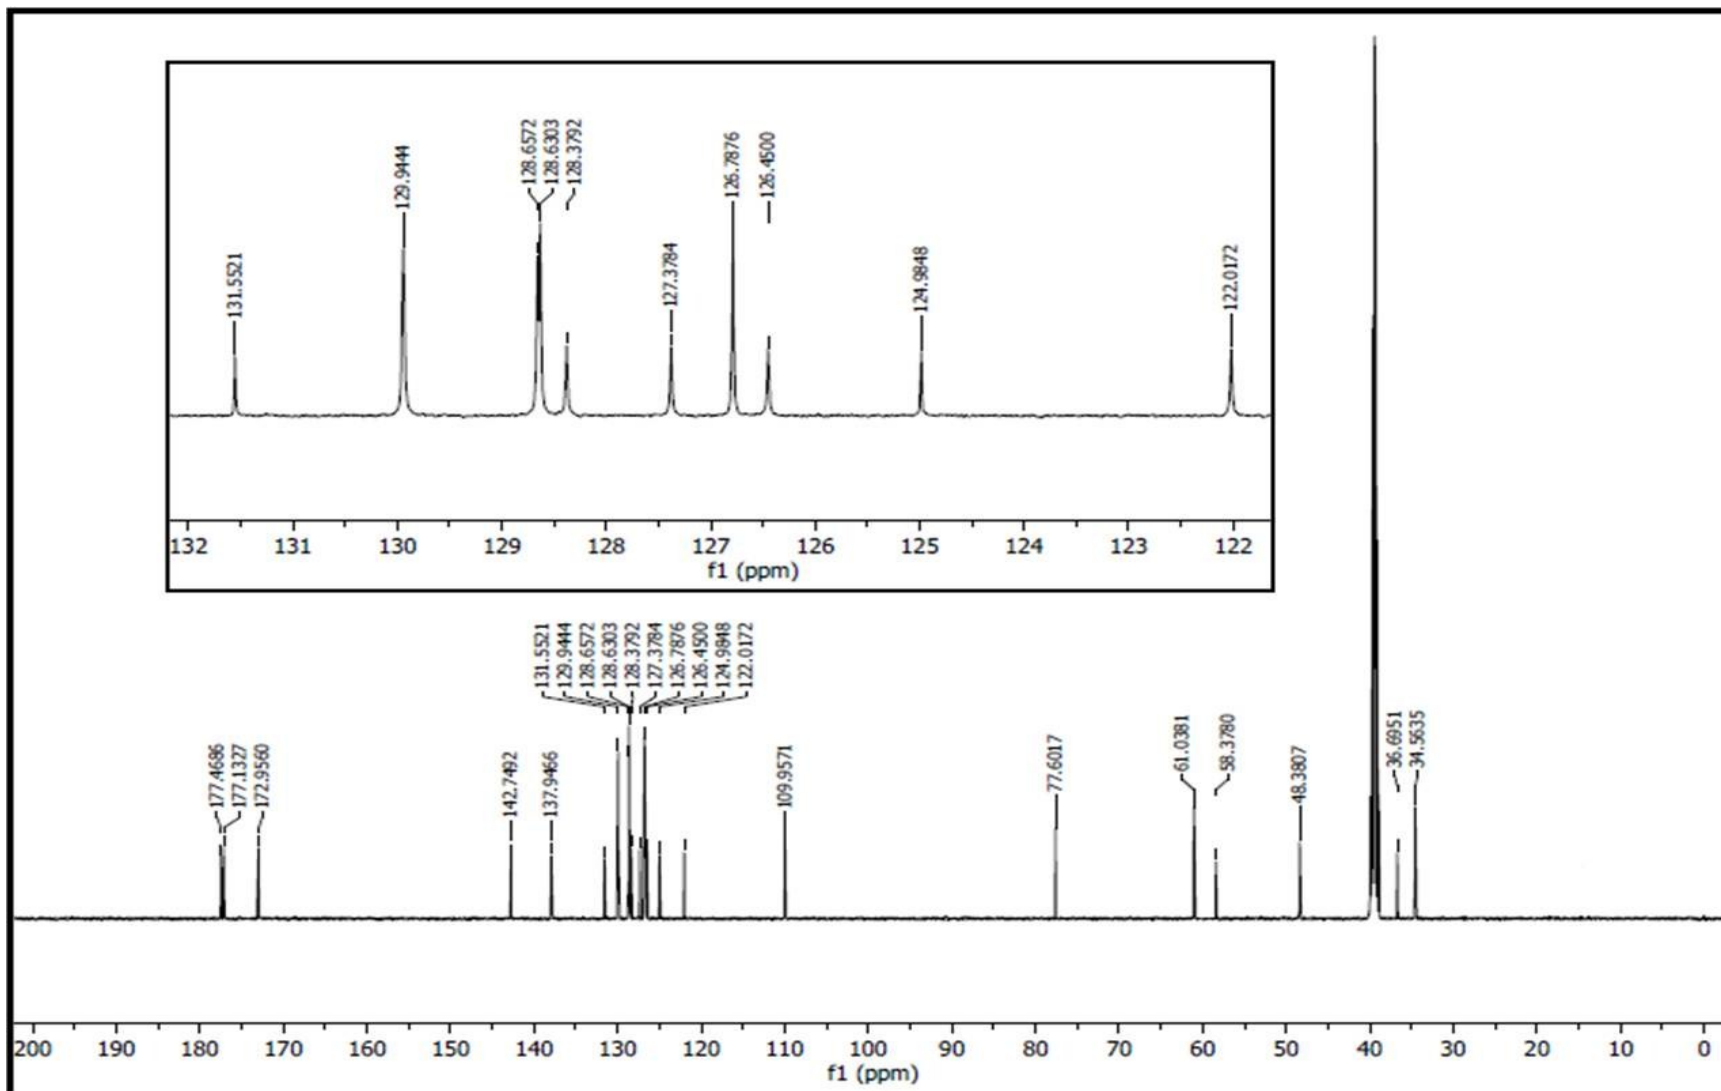

Fig. S3.  $^{13}\text{C}$ -NMR spectrum of compound **8a** in  $\text{DMSO-}d_6$ .



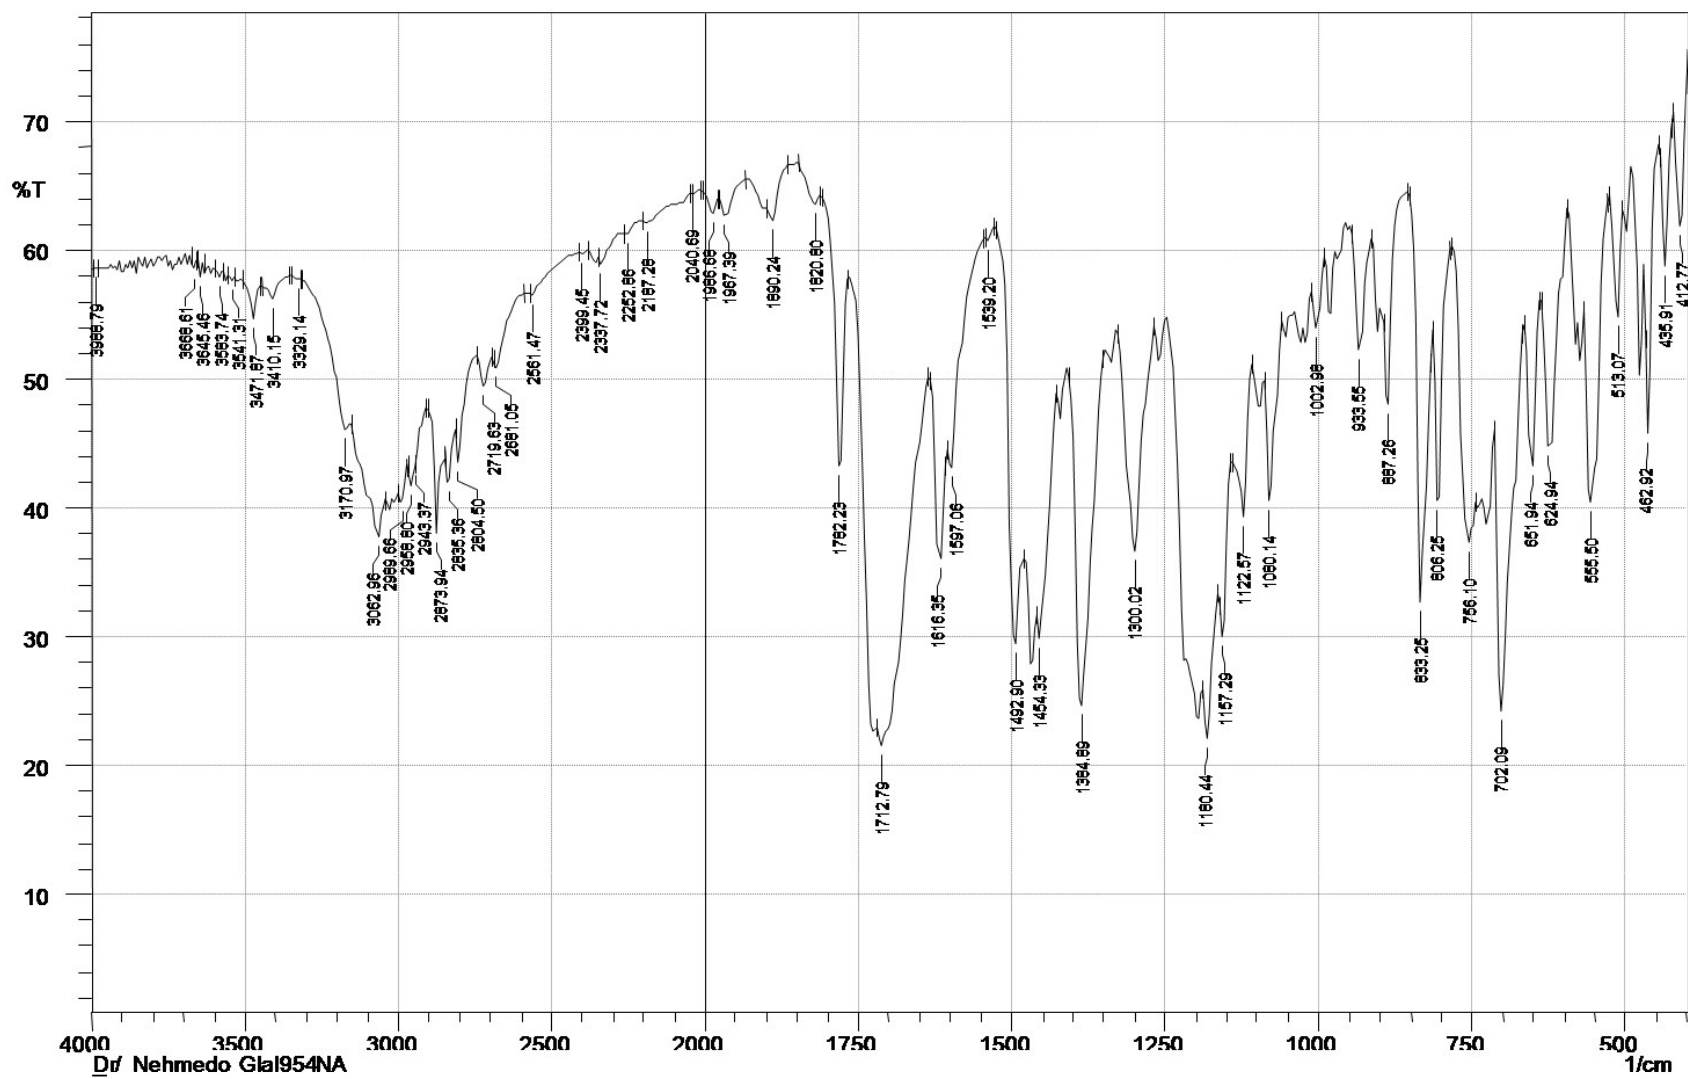

Fig. S4. IR spectrum of compound **8b** (KBr pellet).

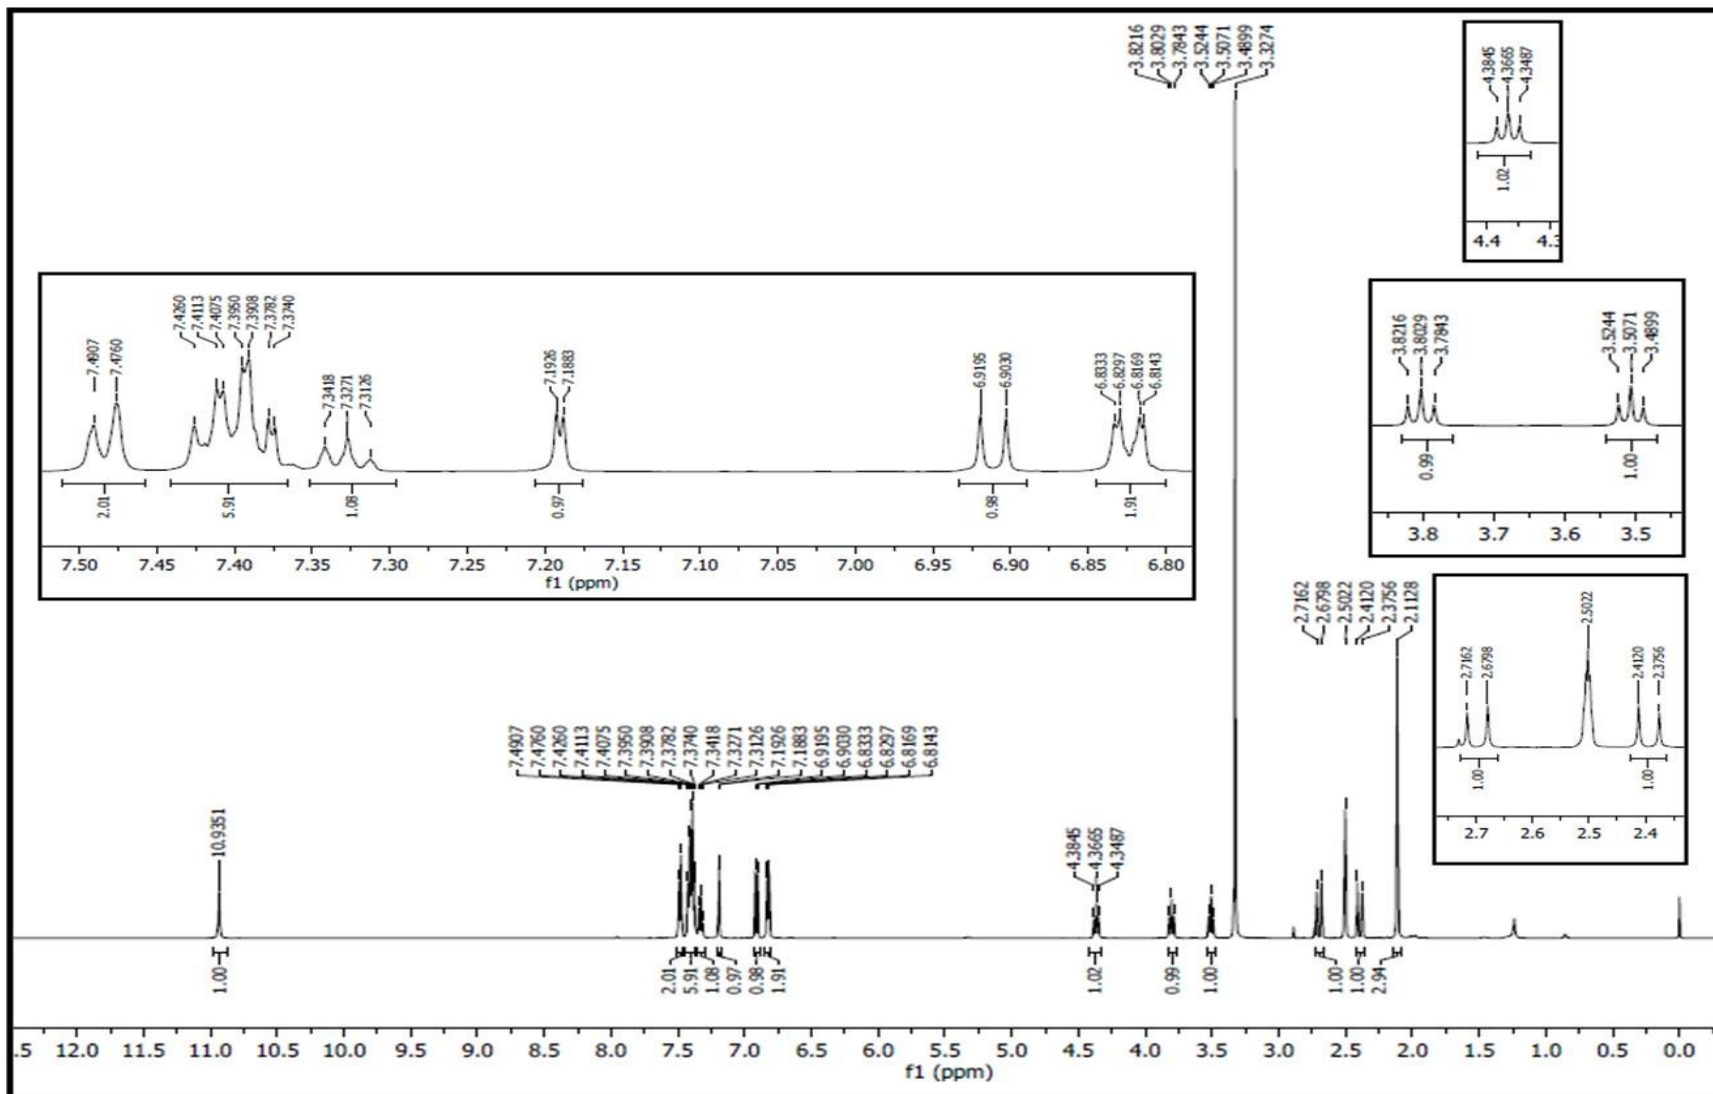

Fig. S5.  $^1\text{H-NMR}$  spectrum of compound **8b** in  $\text{DMSO-}d_6$ .

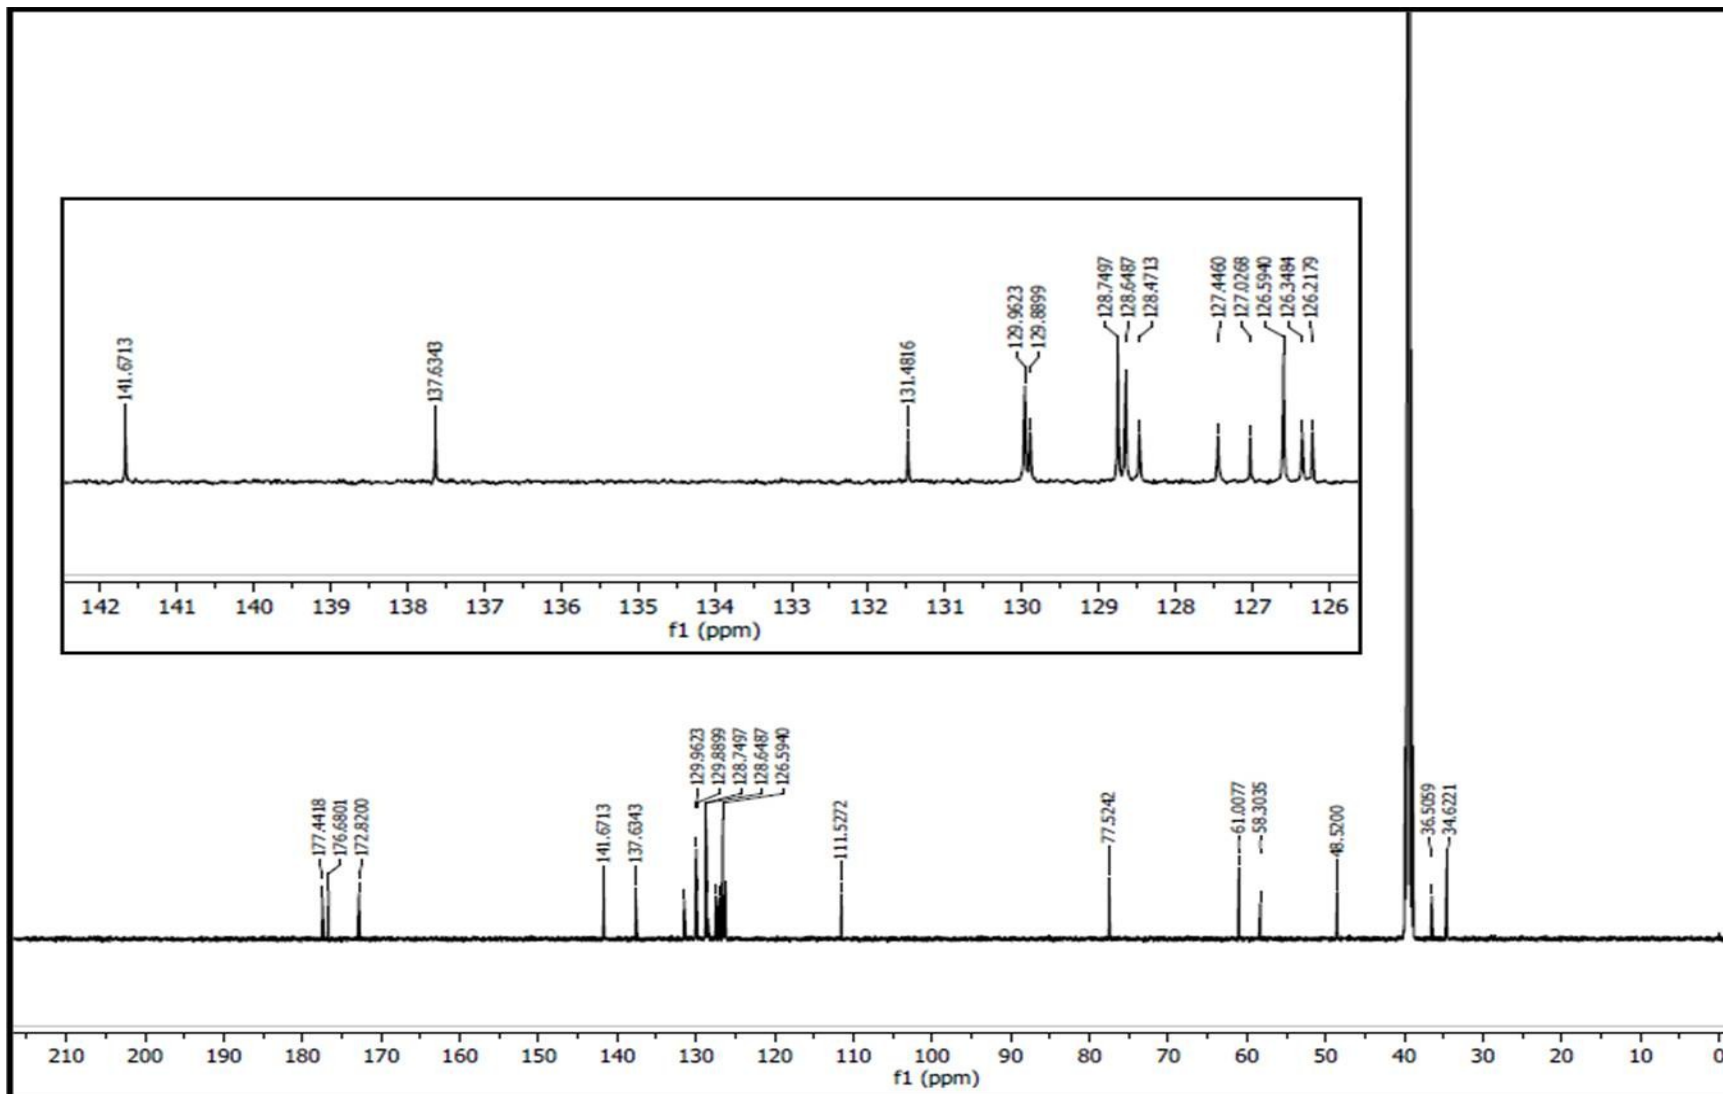

Fig. S6.  $^{13}\text{C}$ -NMR spectrum of compound **8b** in  $\text{DMSO-}d_6$ .

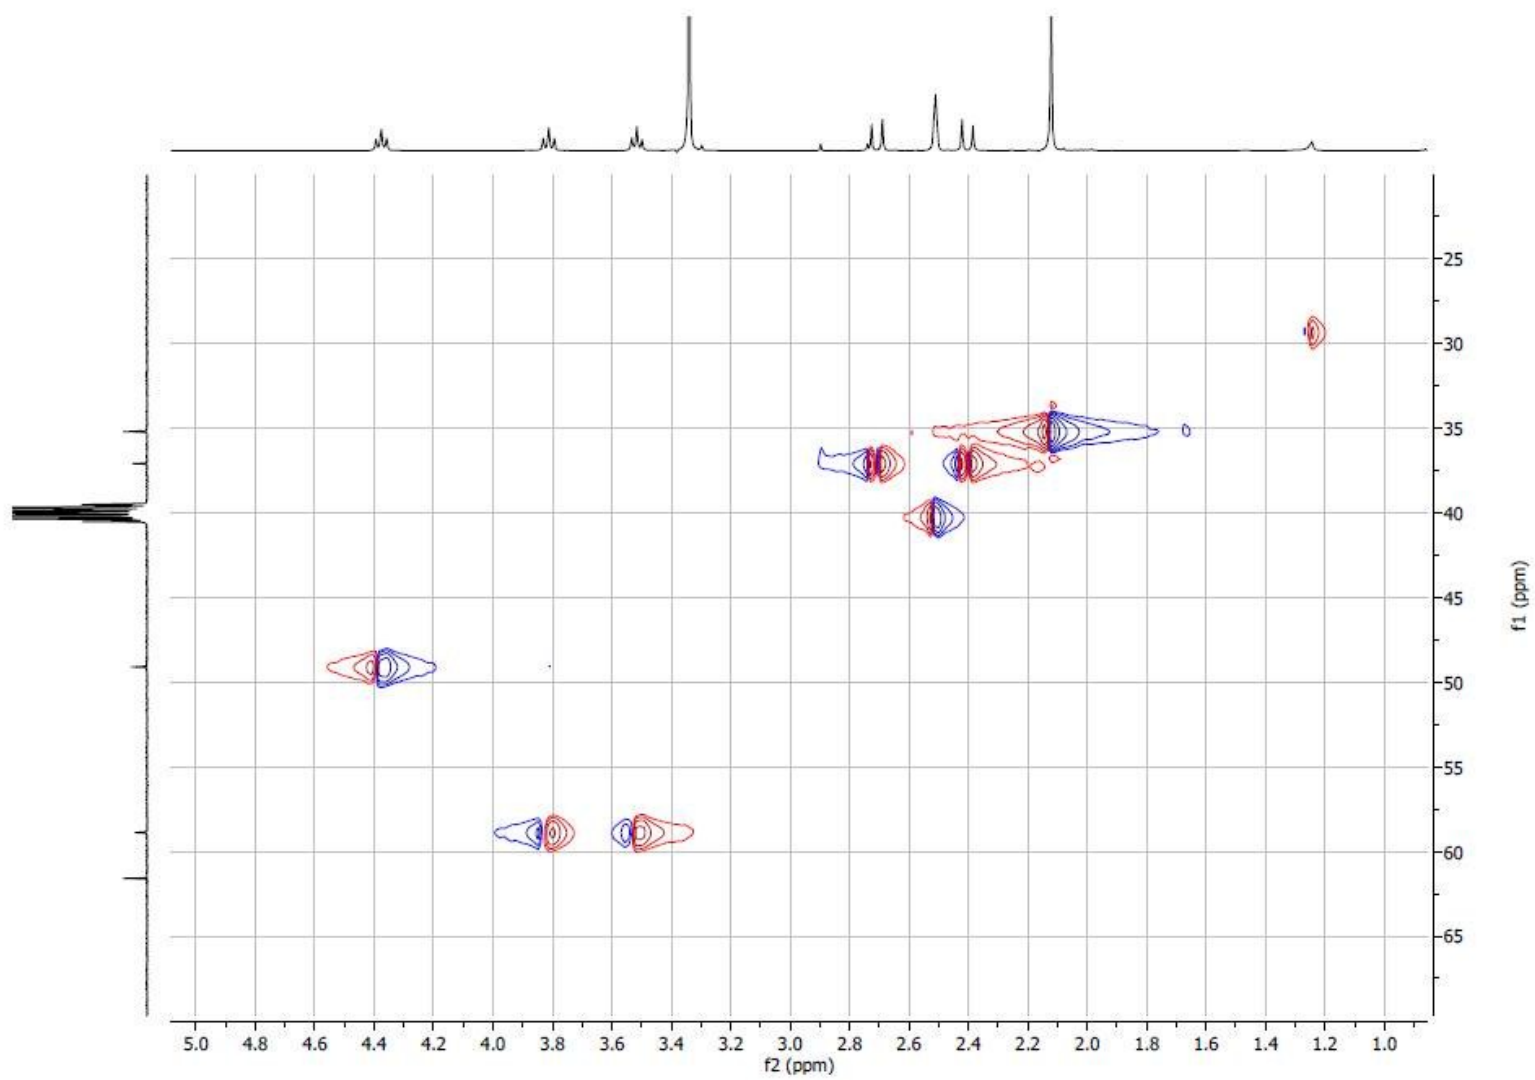

**Fig. S7.** HSQC spectrum of compound **8b** in DMSO- $d_6$ .

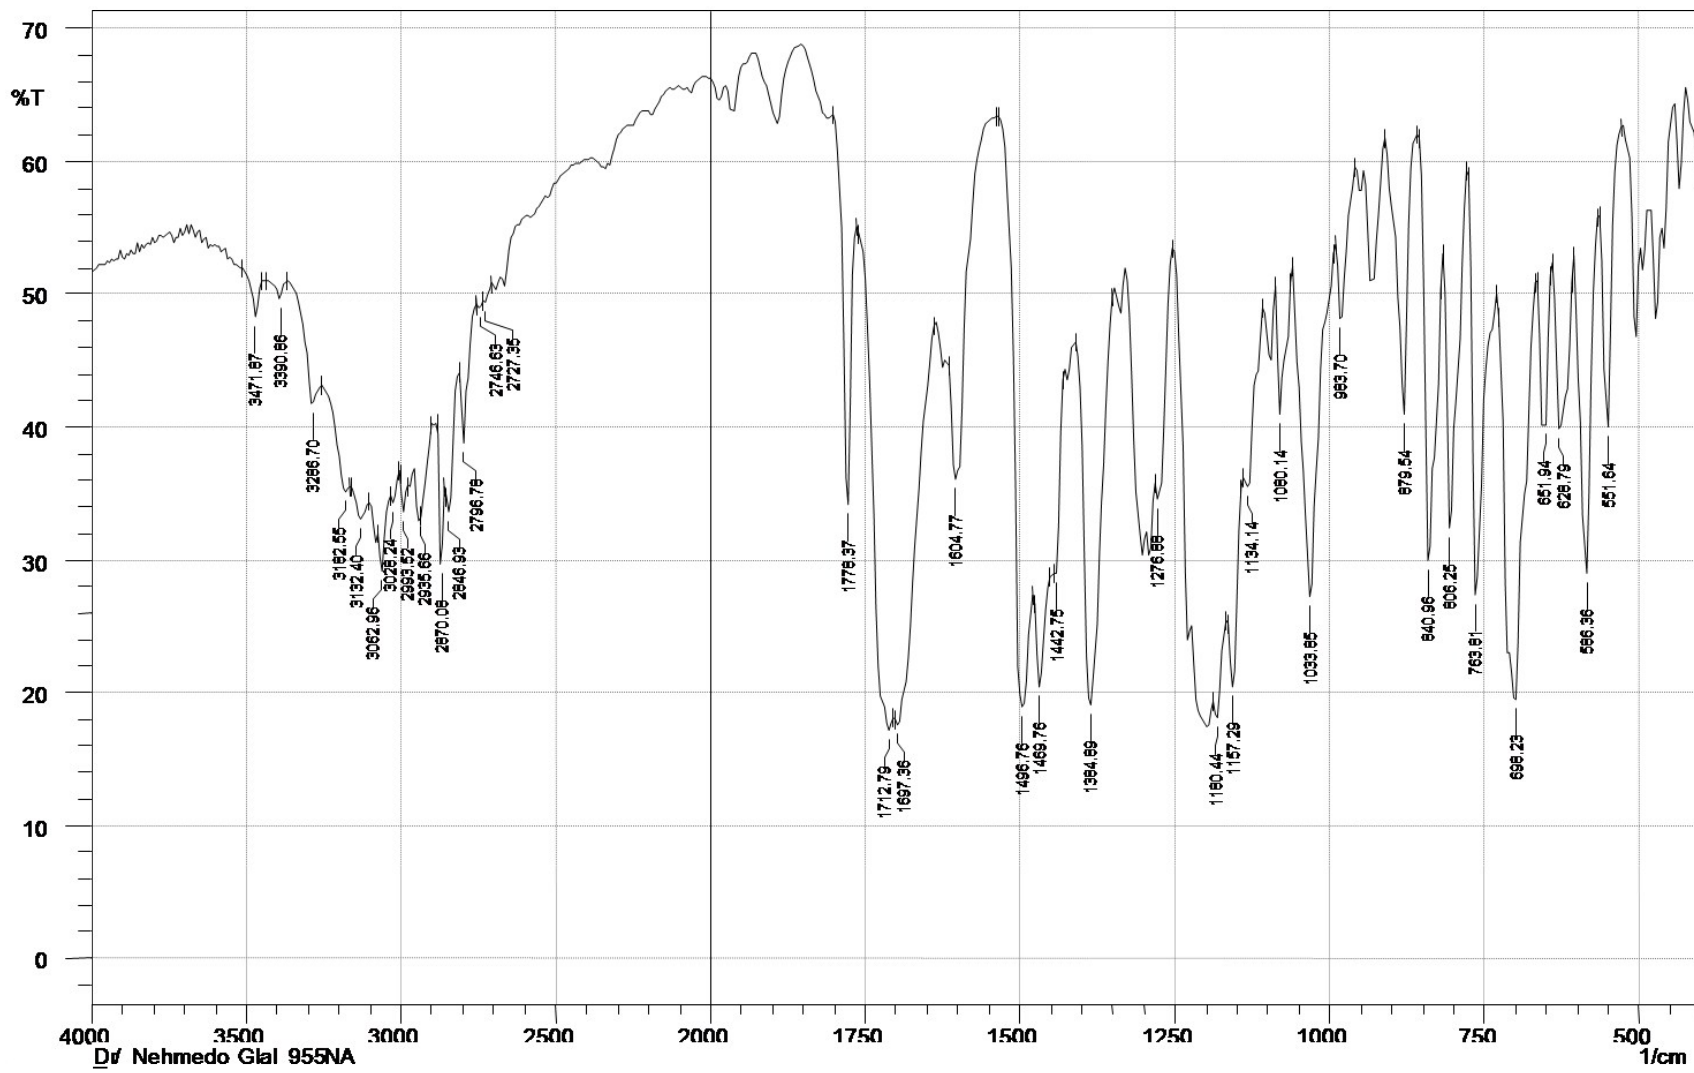

Fig. S8. IR spectrum of compound 8c (KBr pellet).

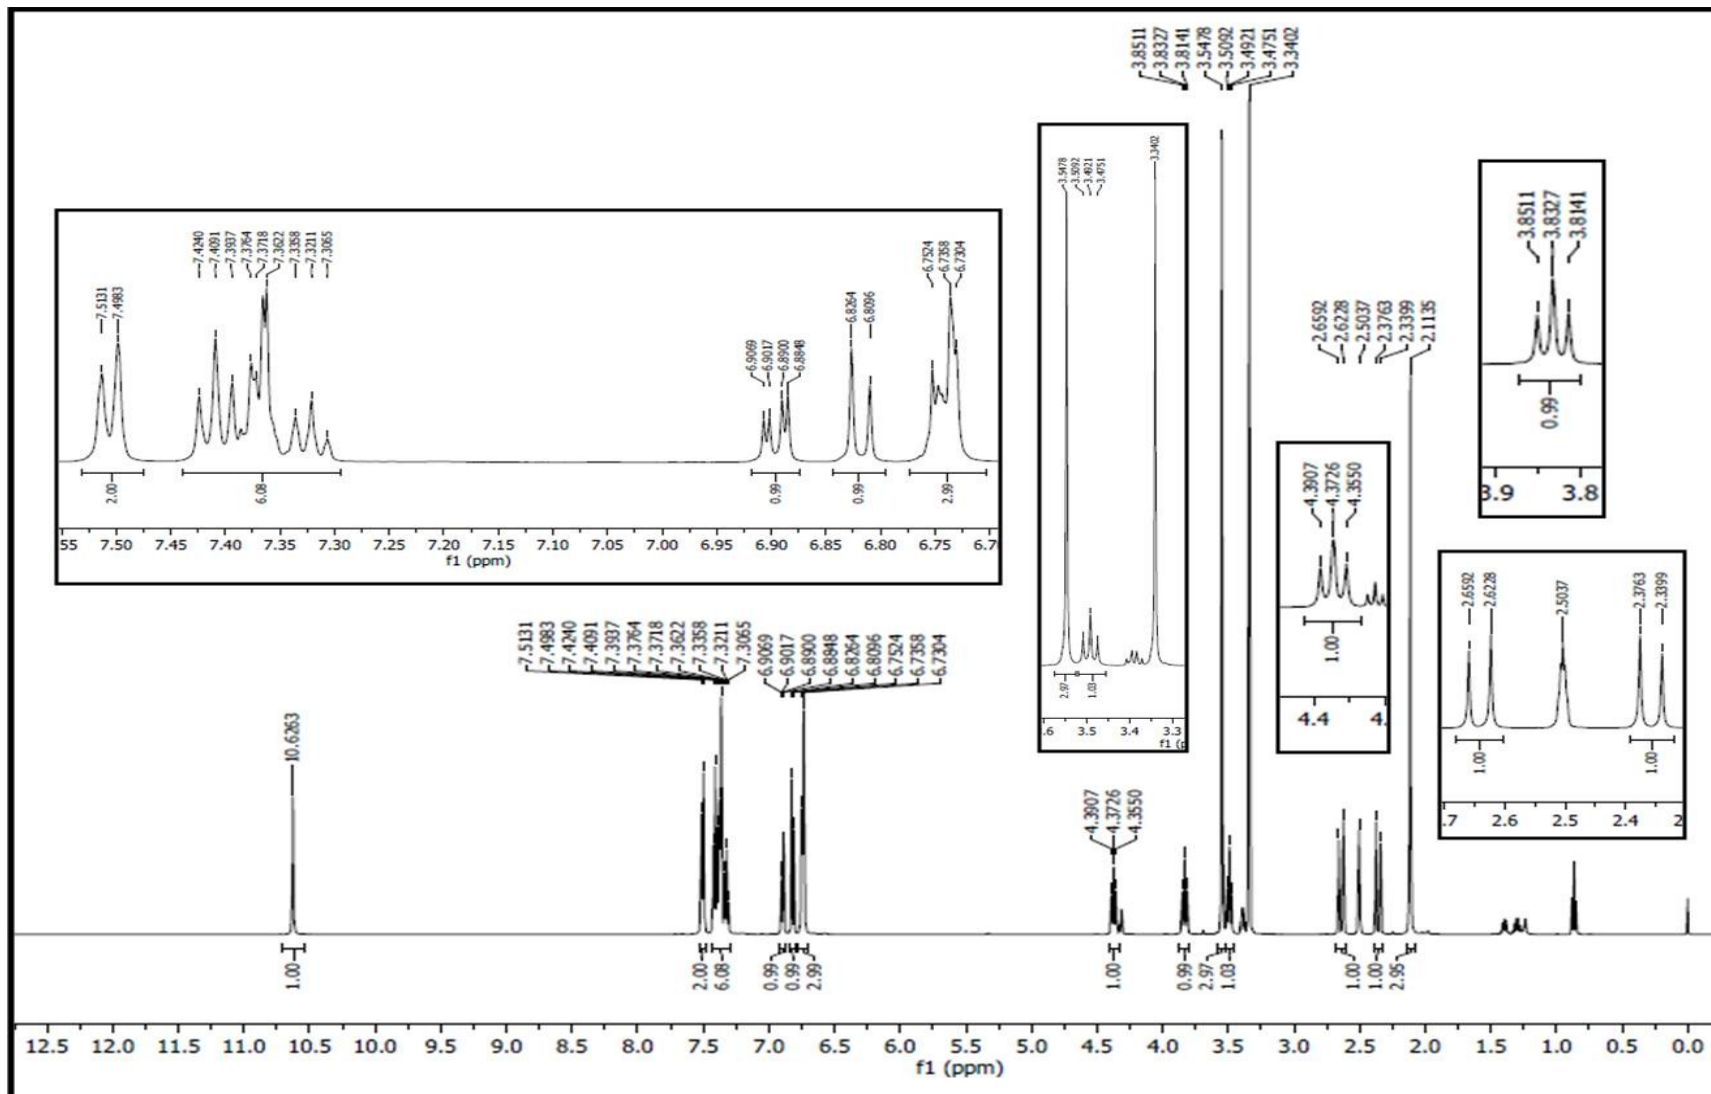

Fig. S9.  $^1\text{H-NMR}$  spectrum of compound **8c** in  $\text{DMSO-}d_6$ .

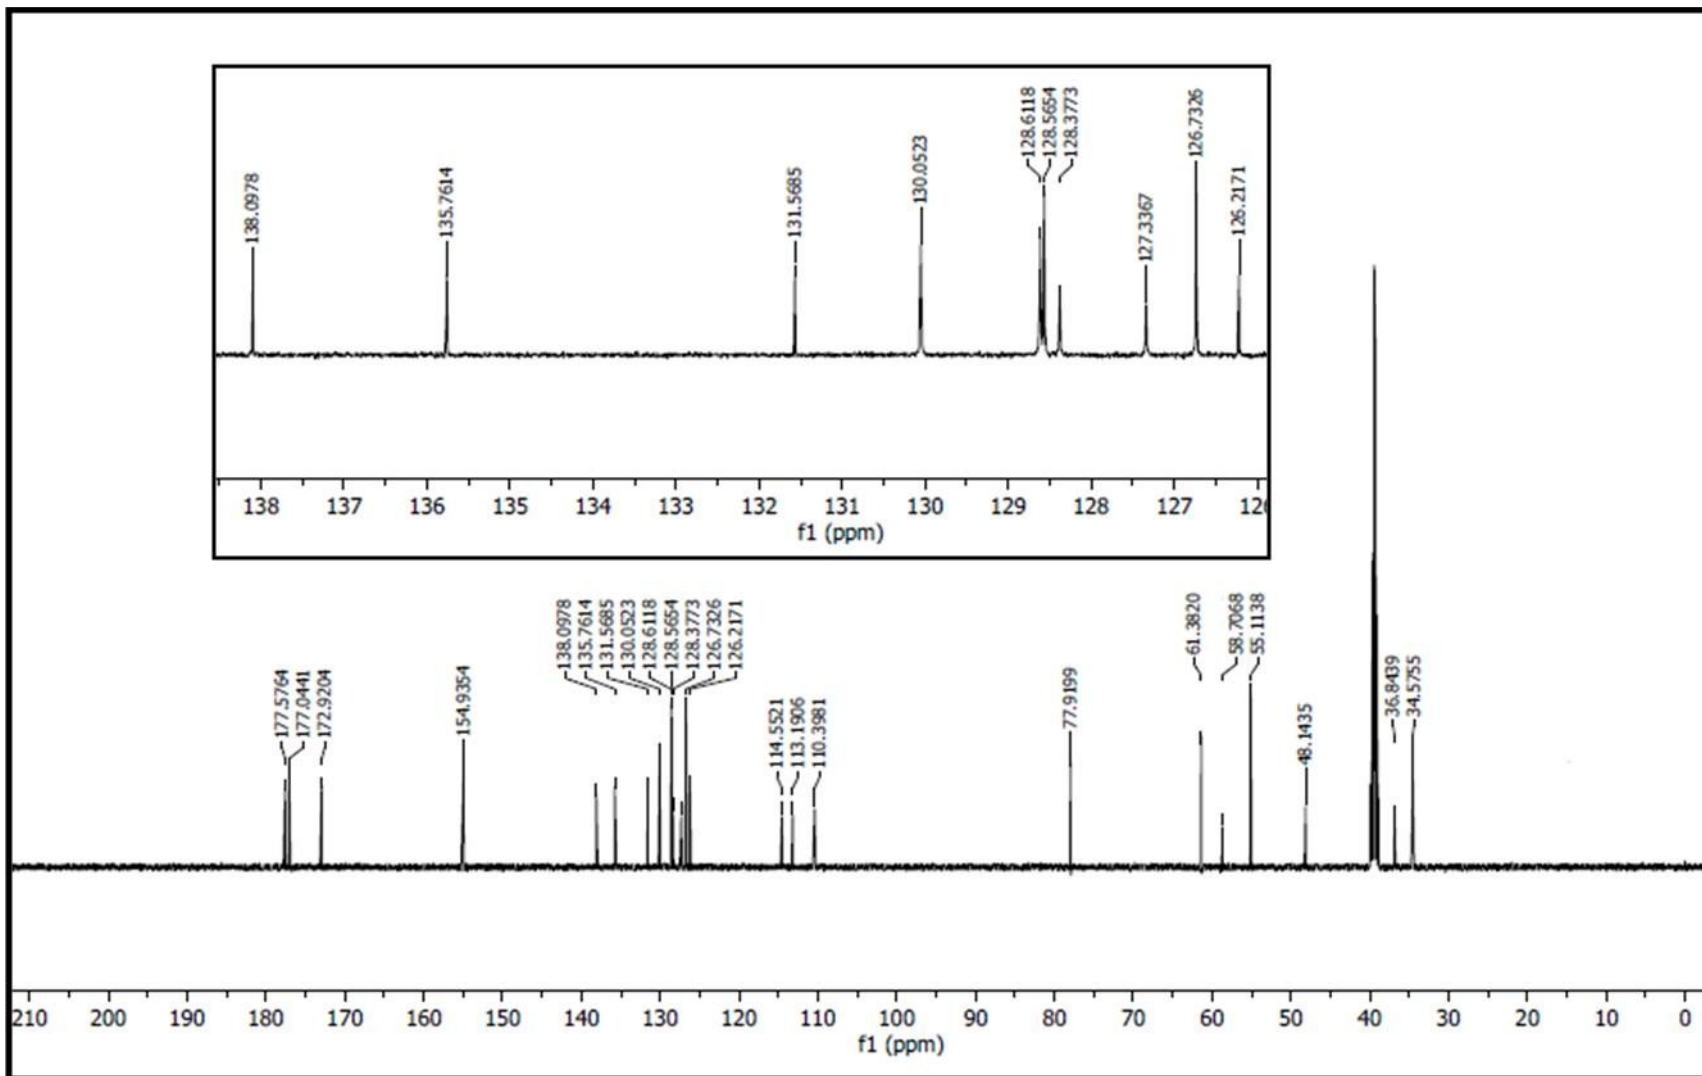

**Fig. S10.**  $^{13}\text{C}$ -NMR spectrum of compound **8c** in  $\text{DMSO-}d_6$ .

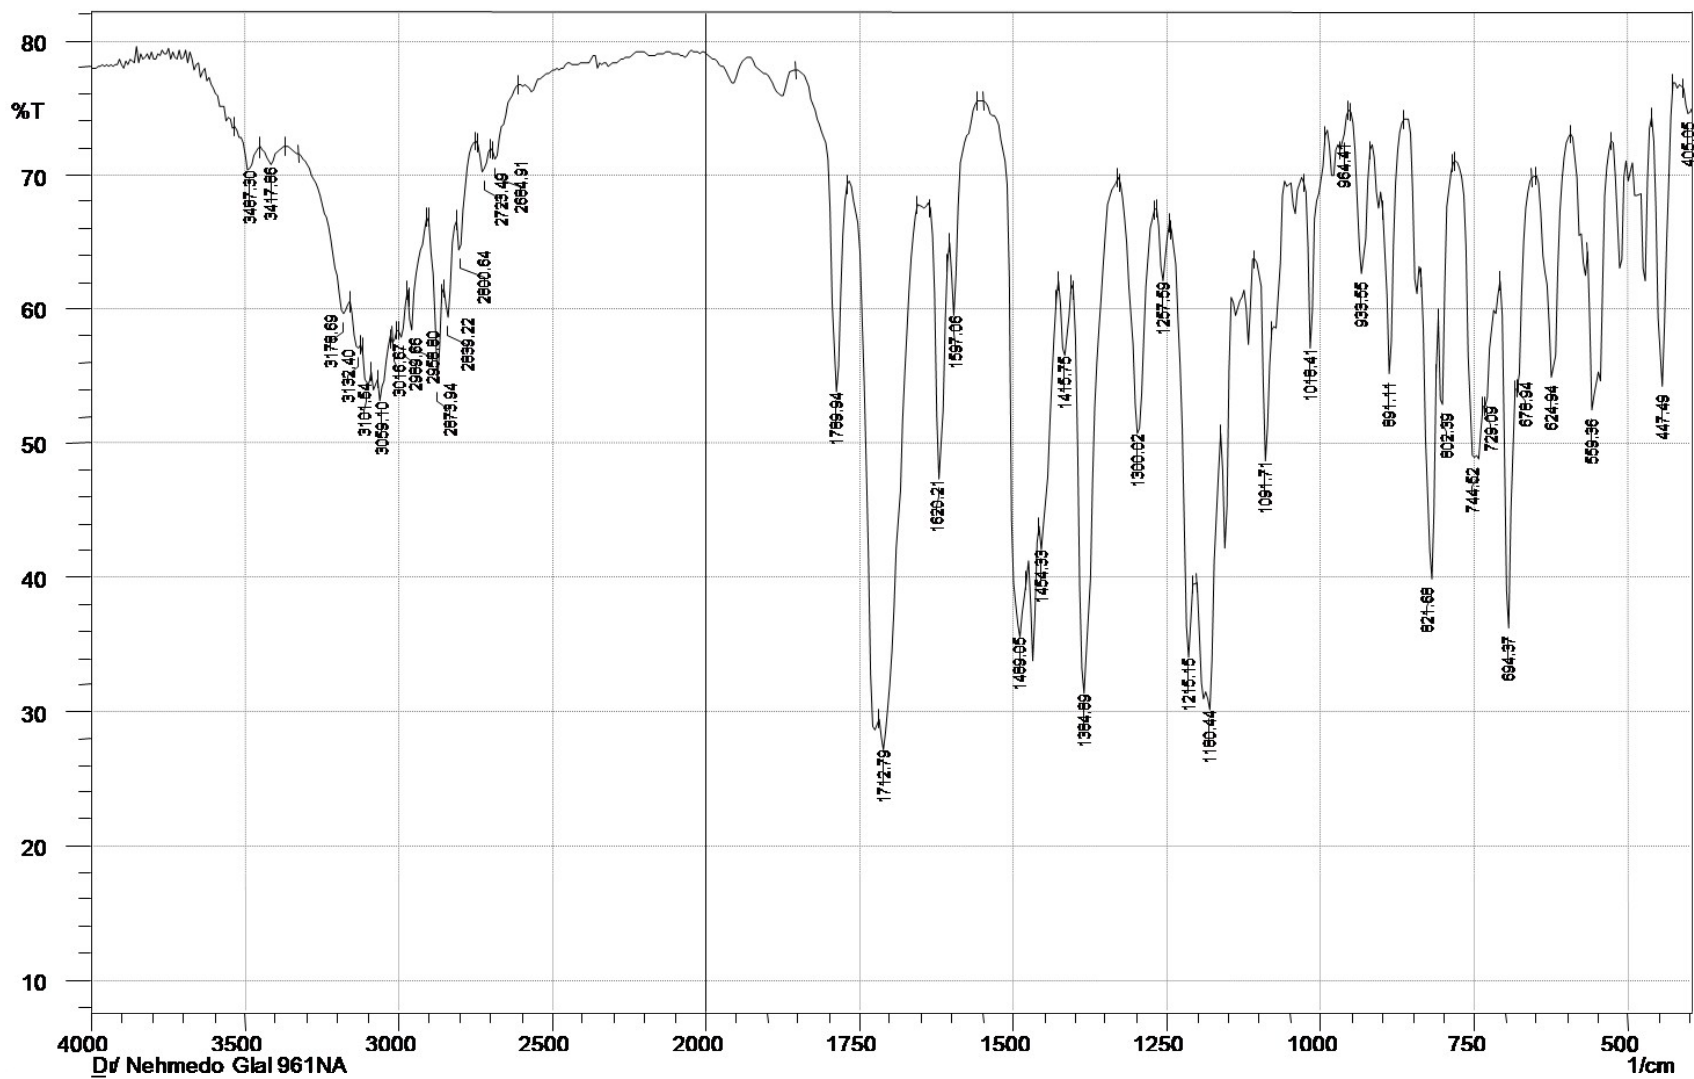

Fig. S11. IR spectrum of compound **8d** (KBr pellet).



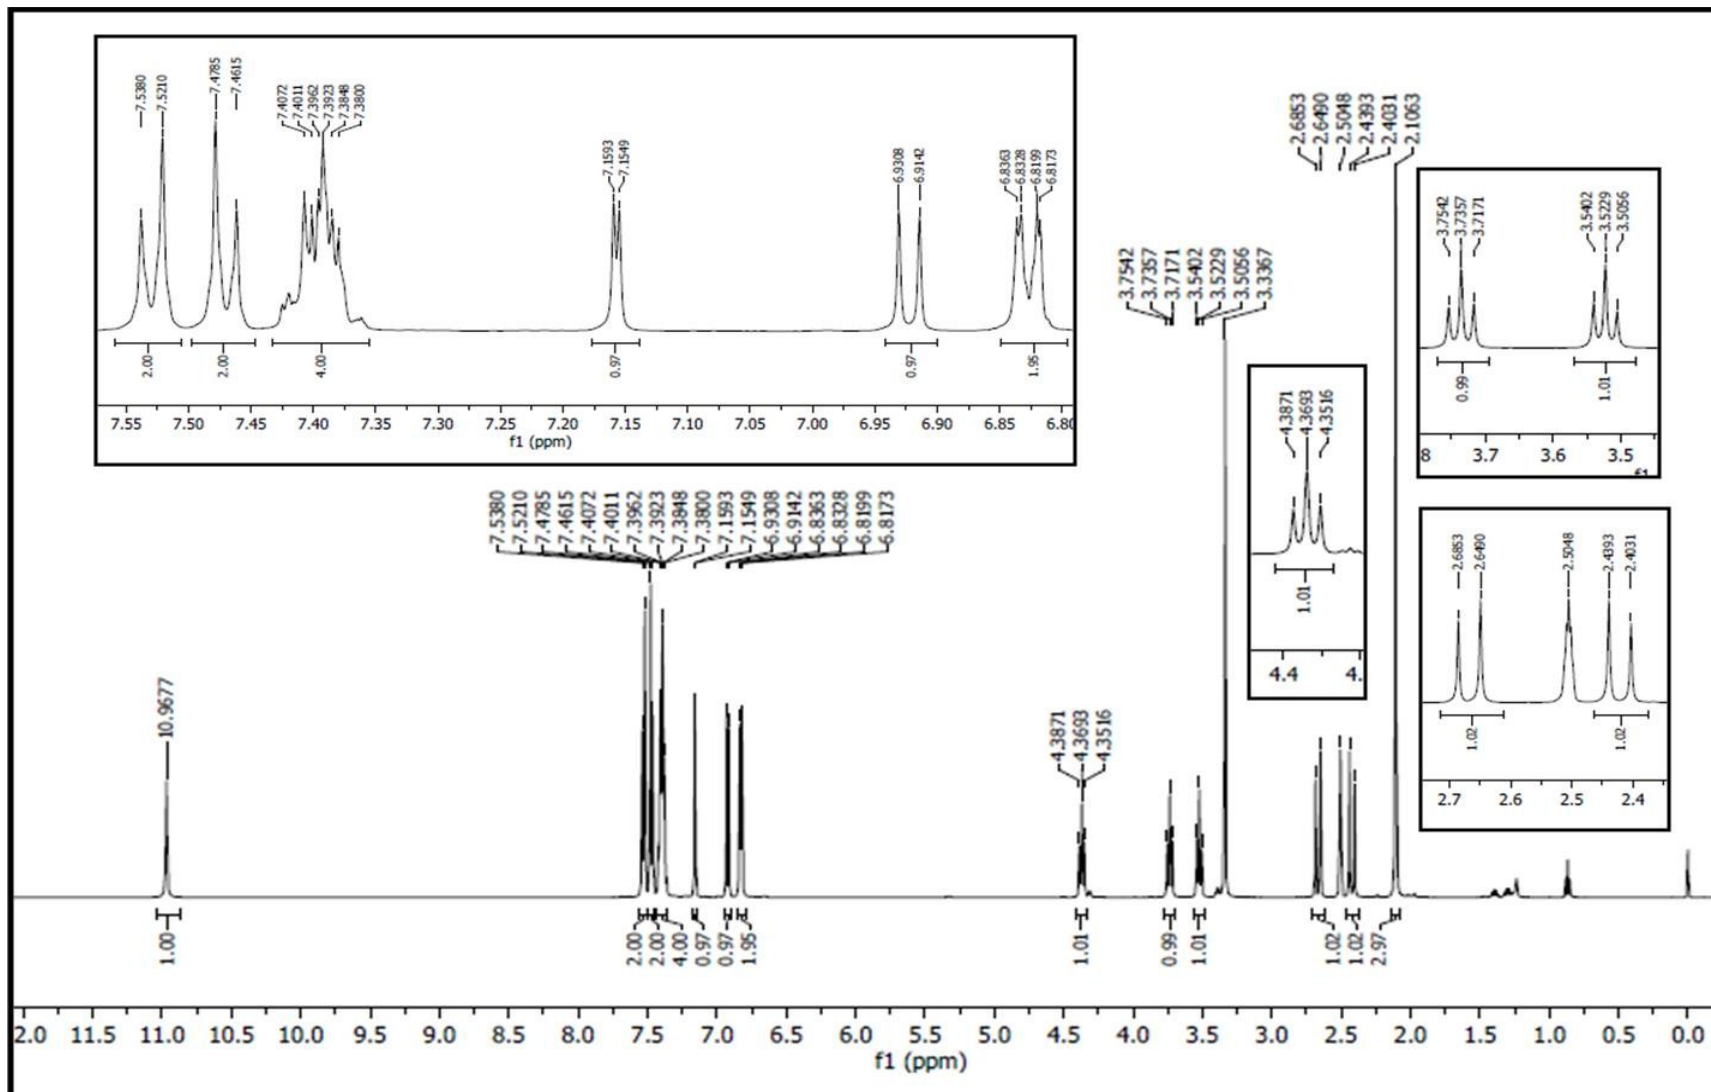

Fig. S12.  $^1\text{H-NMR}$  spectrum of compound **8d** in  $\text{DMSO-}d_6$ .

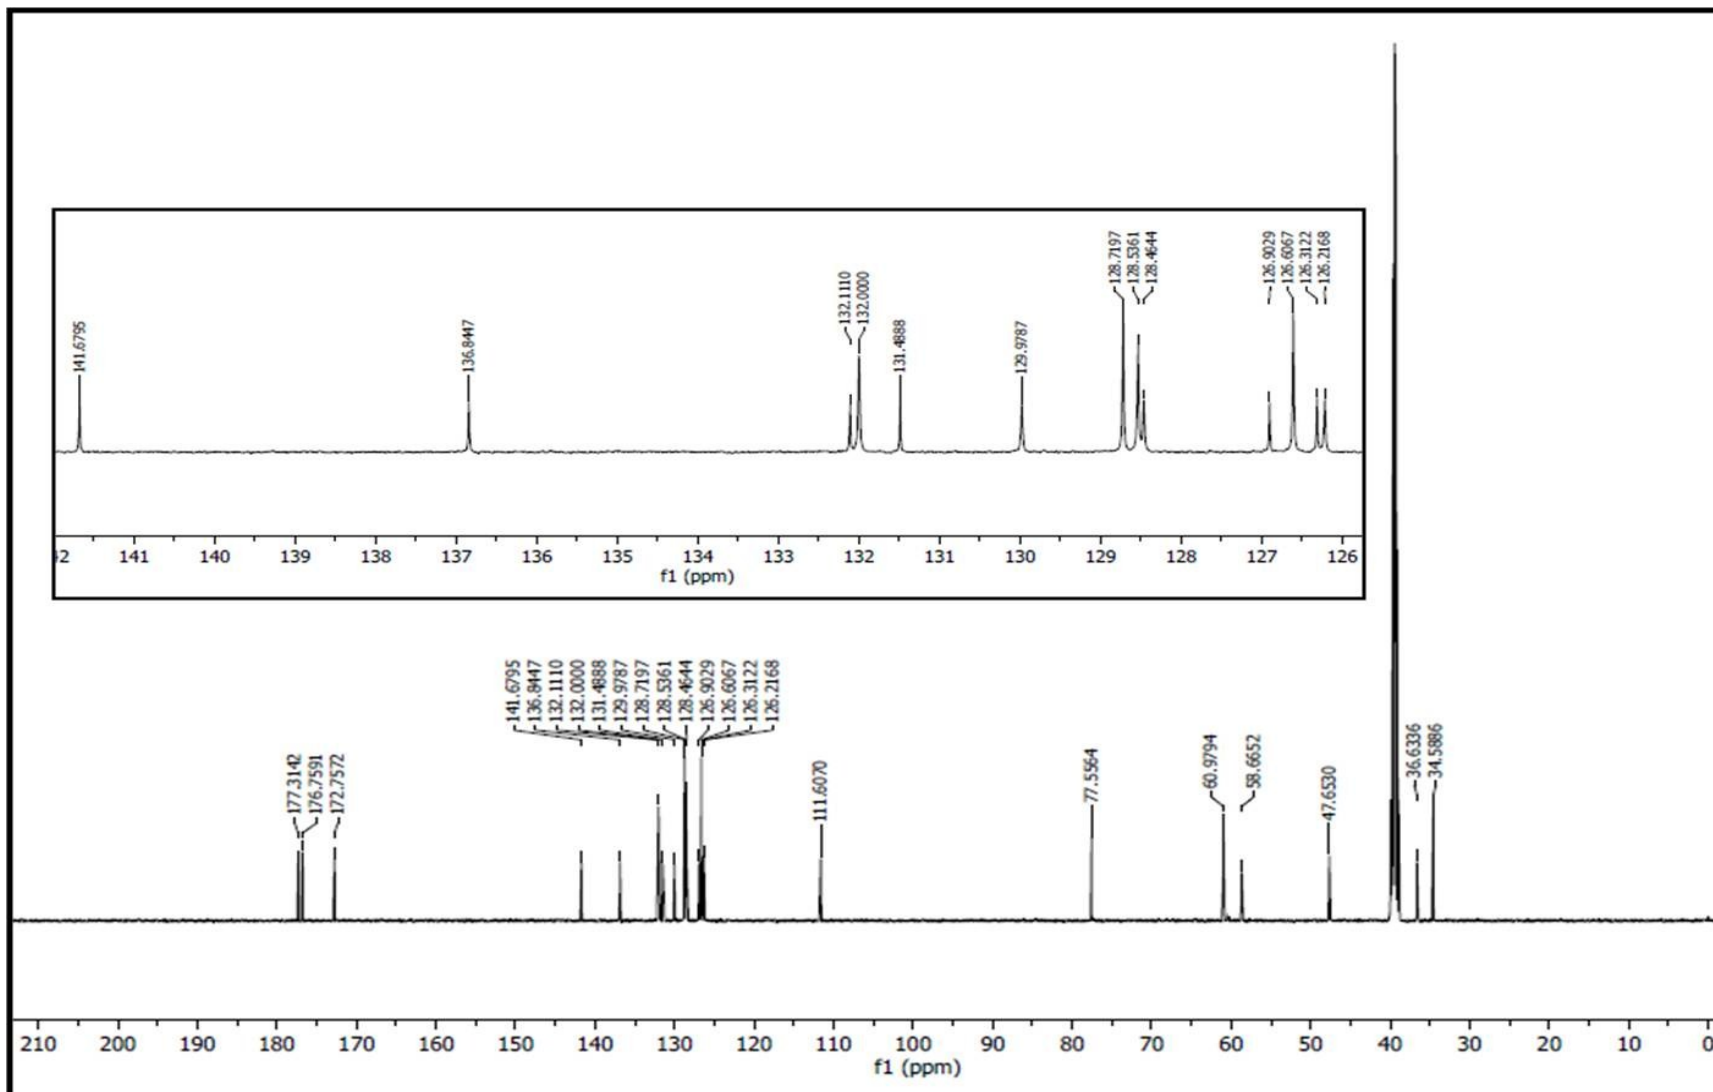

**Fig. S13.** <sup>13</sup>C-NMR spectrum of compound **8d** in DMSO-*d*<sub>6</sub>.

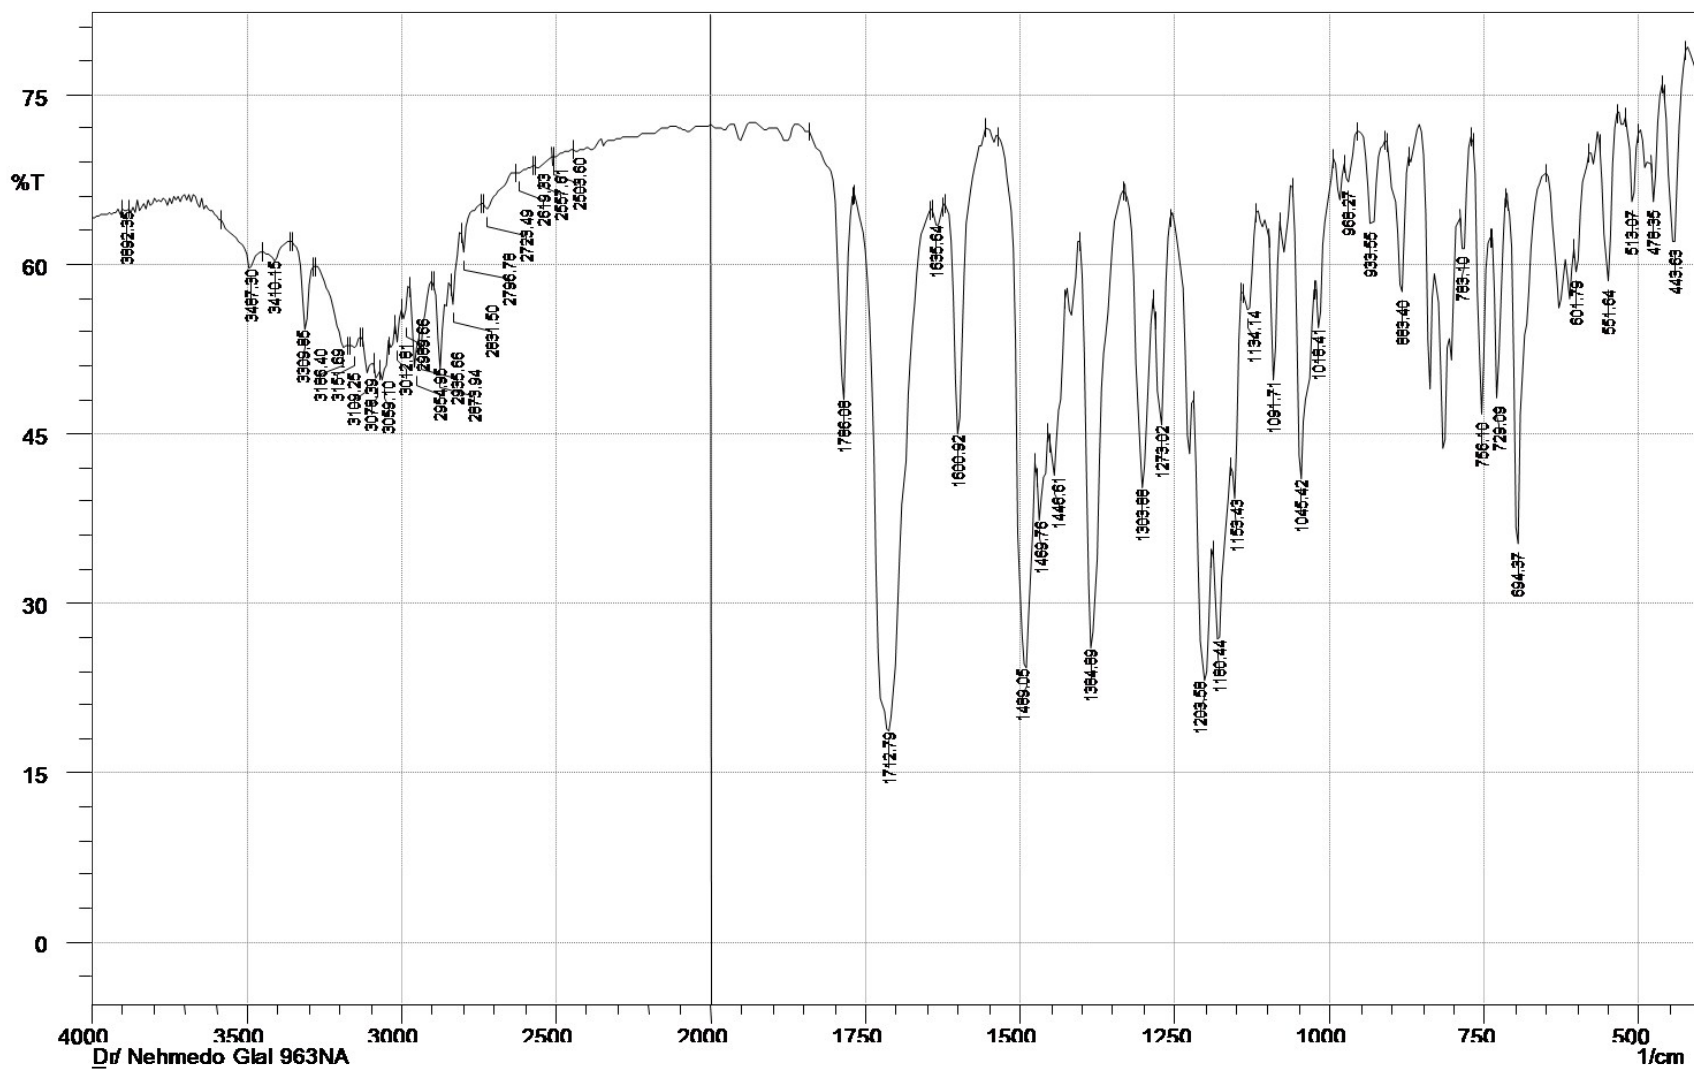

Fig. S14. IR spectrum of compound **8e** (KBr pellet).

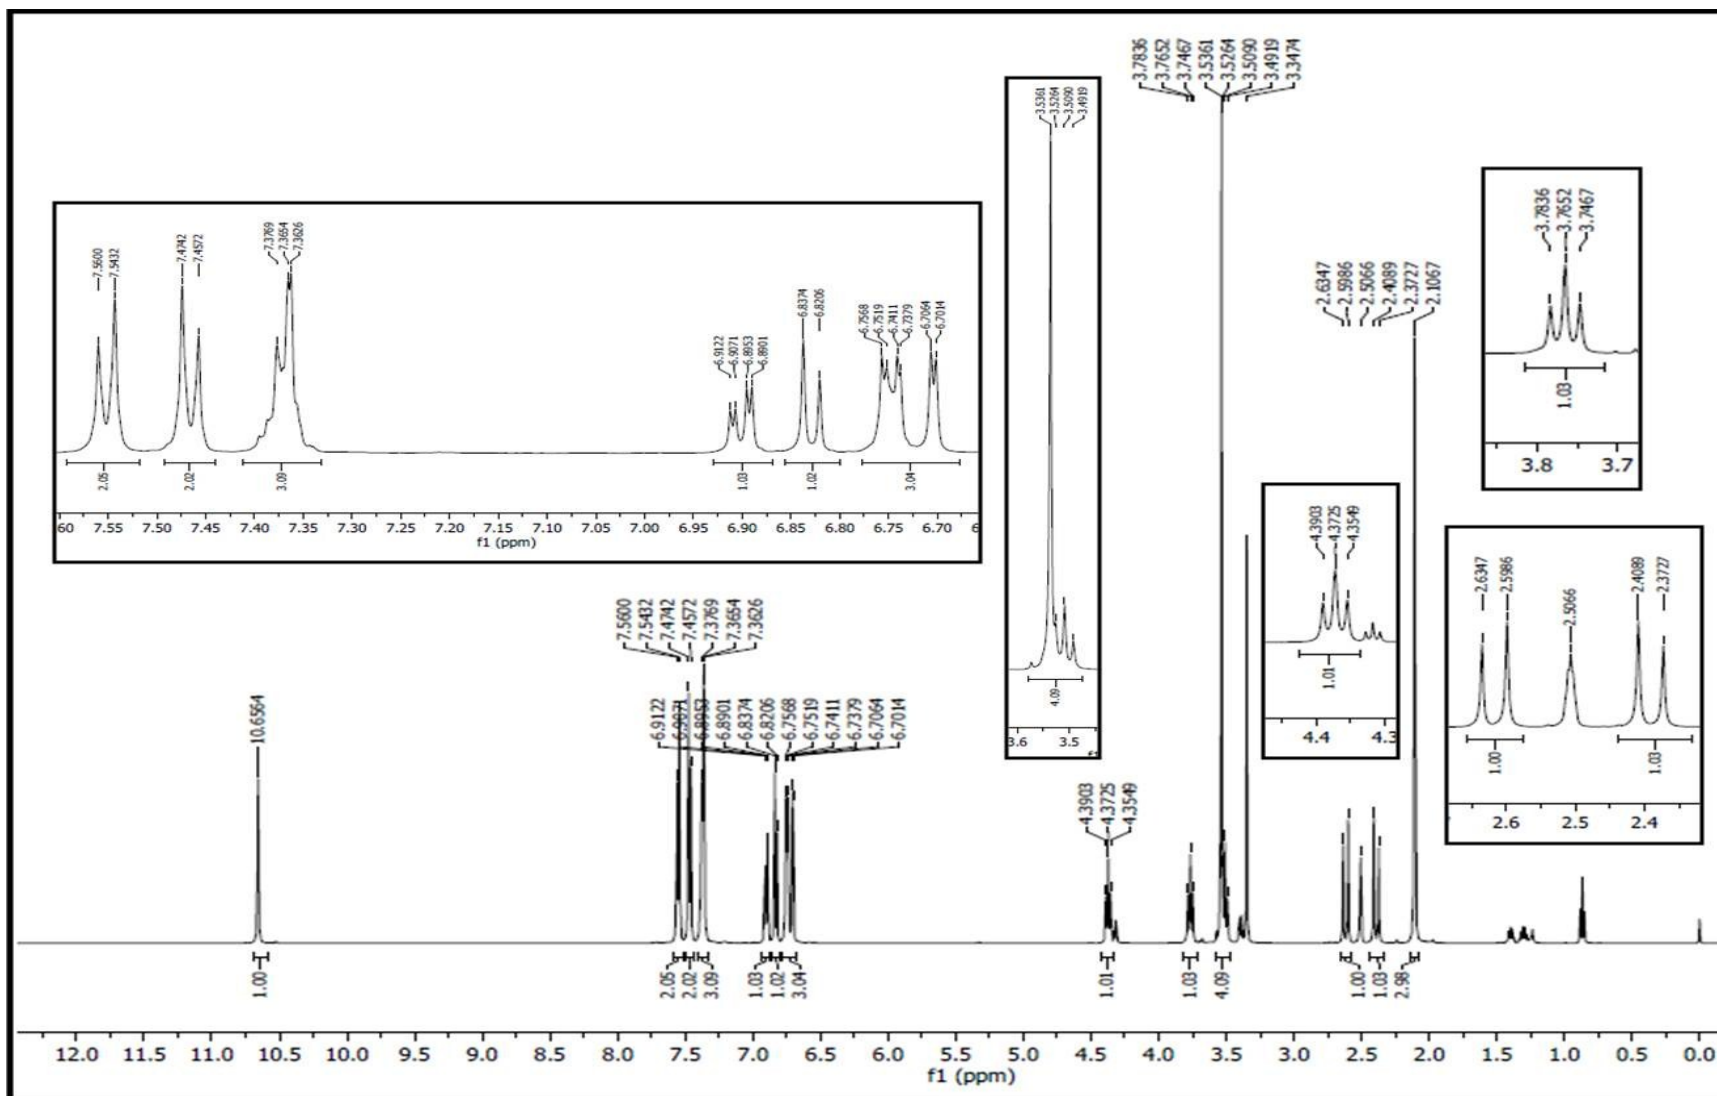

Fig. S15.  $^1\text{H-NMR}$  spectrum of compound **8e** in  $\text{DMSO-}d_6$ .

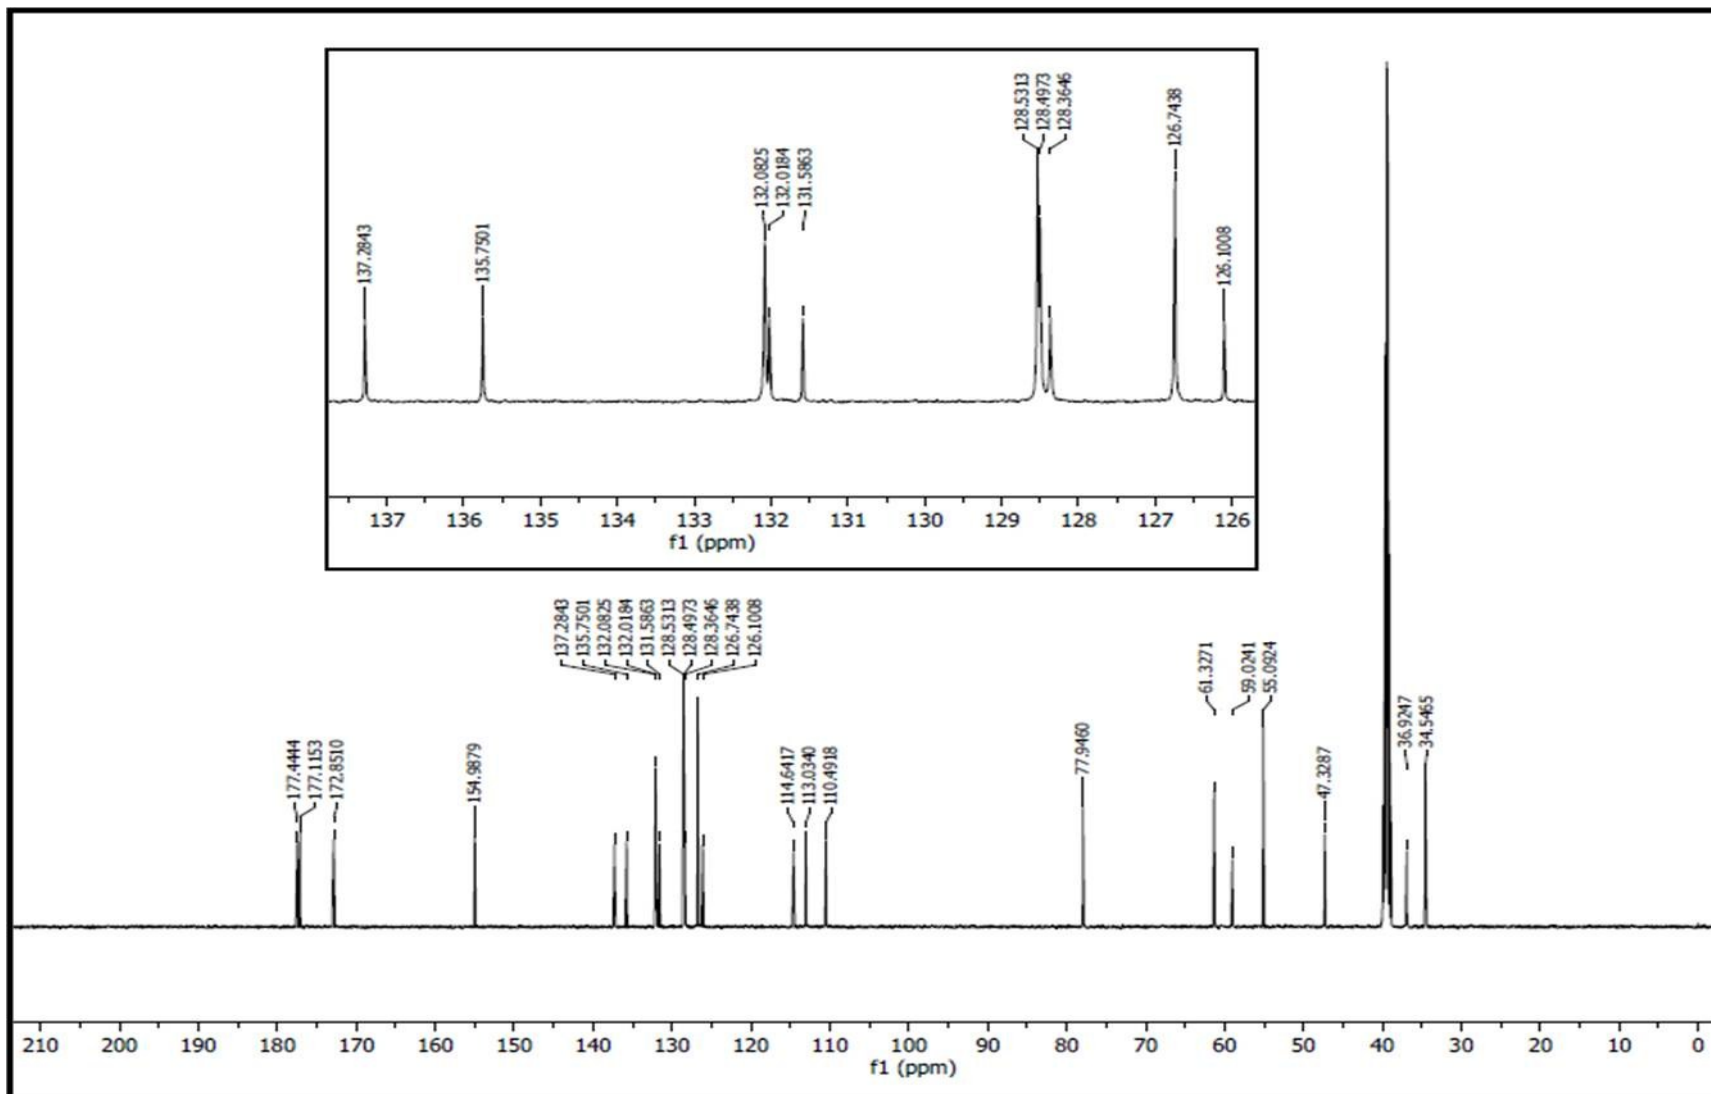

Fig. S16.  $^{13}\text{C}$ -NMR spectrum of compound **8e** in  $\text{DMSO-}d_6$ .

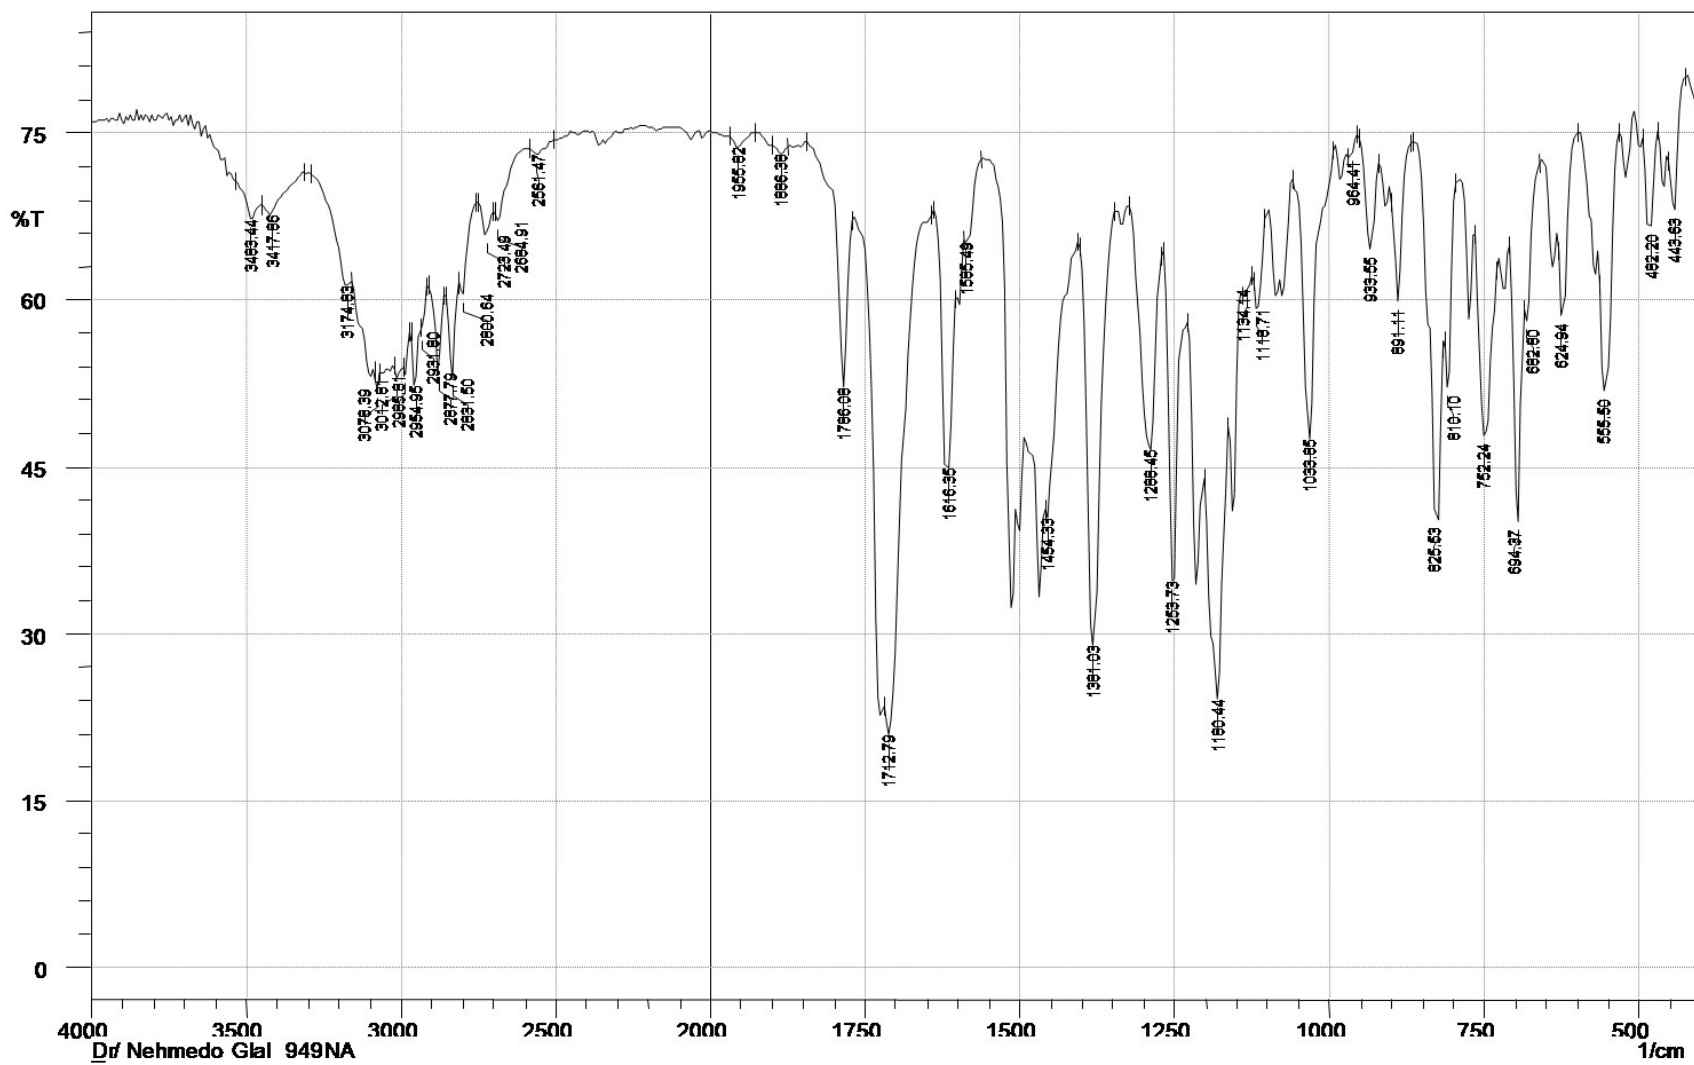

Fig. S17. IR spectrum of compound **8f** (KBr pellet).

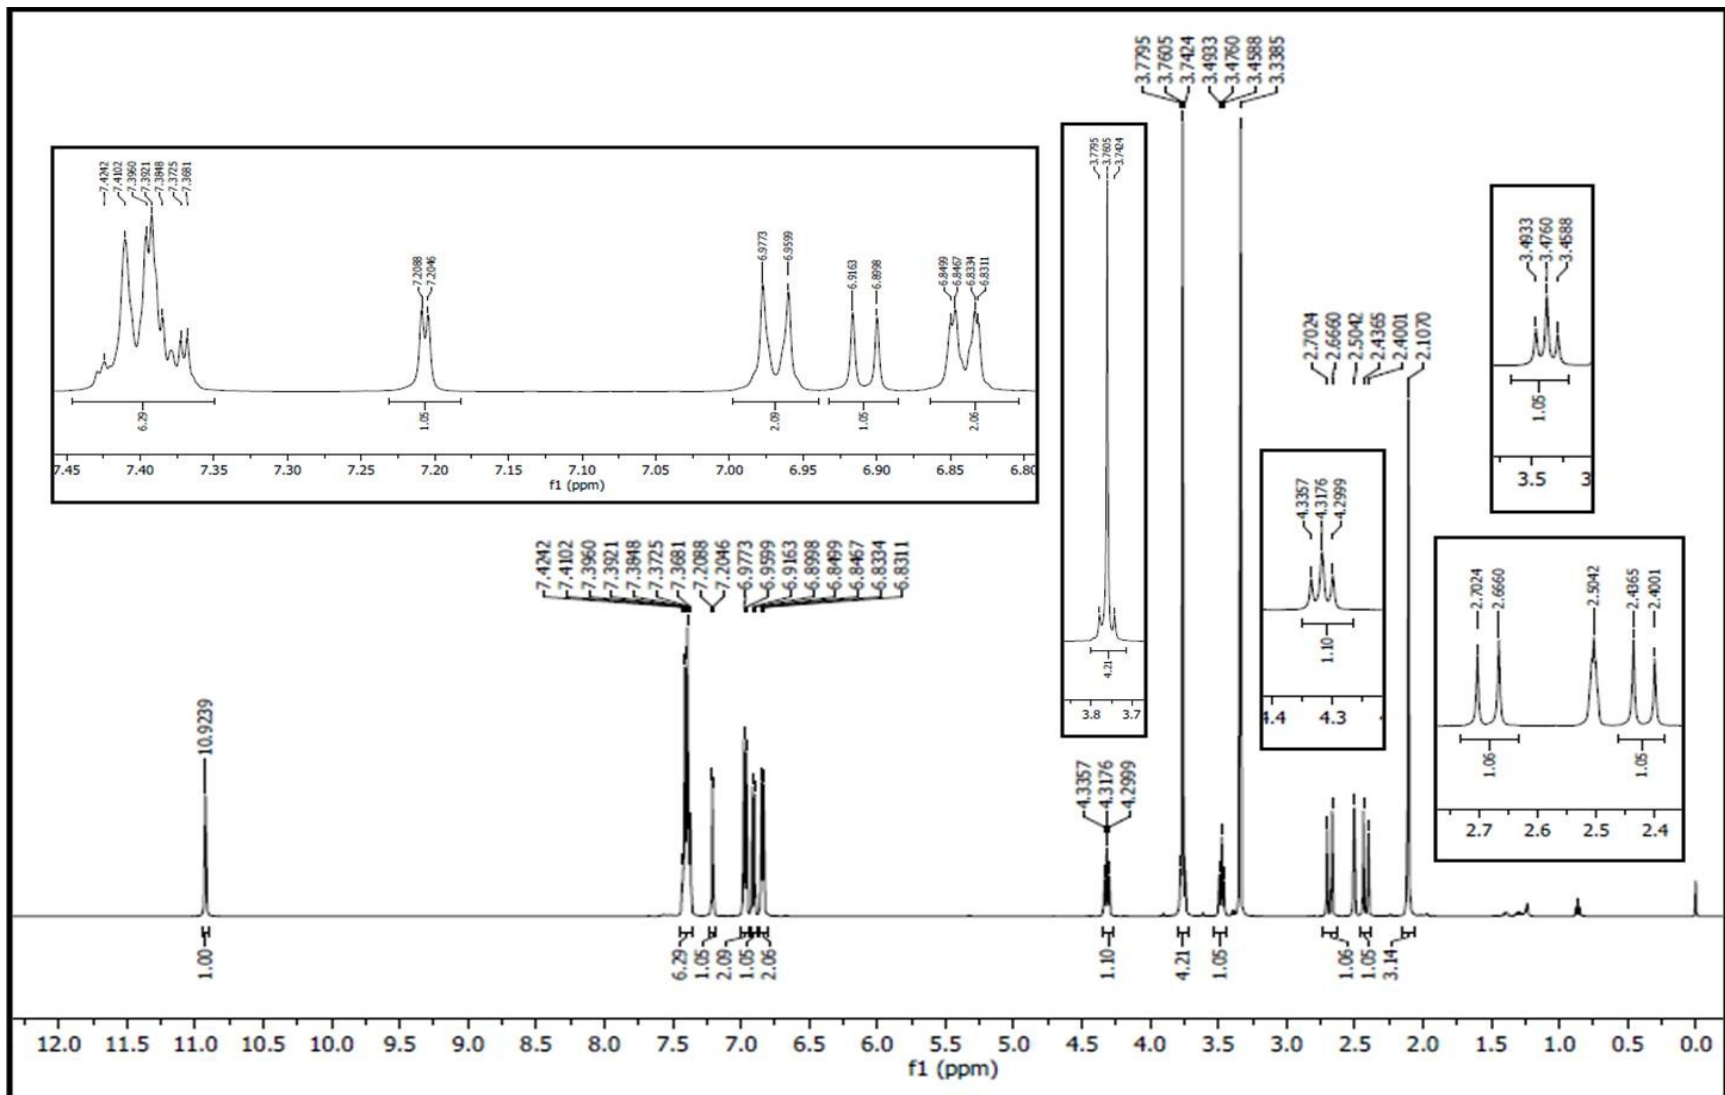

Fig. S18. <sup>1</sup>H-NMR spectrum of compound **8f** in DMSO-*d*<sub>6</sub>.

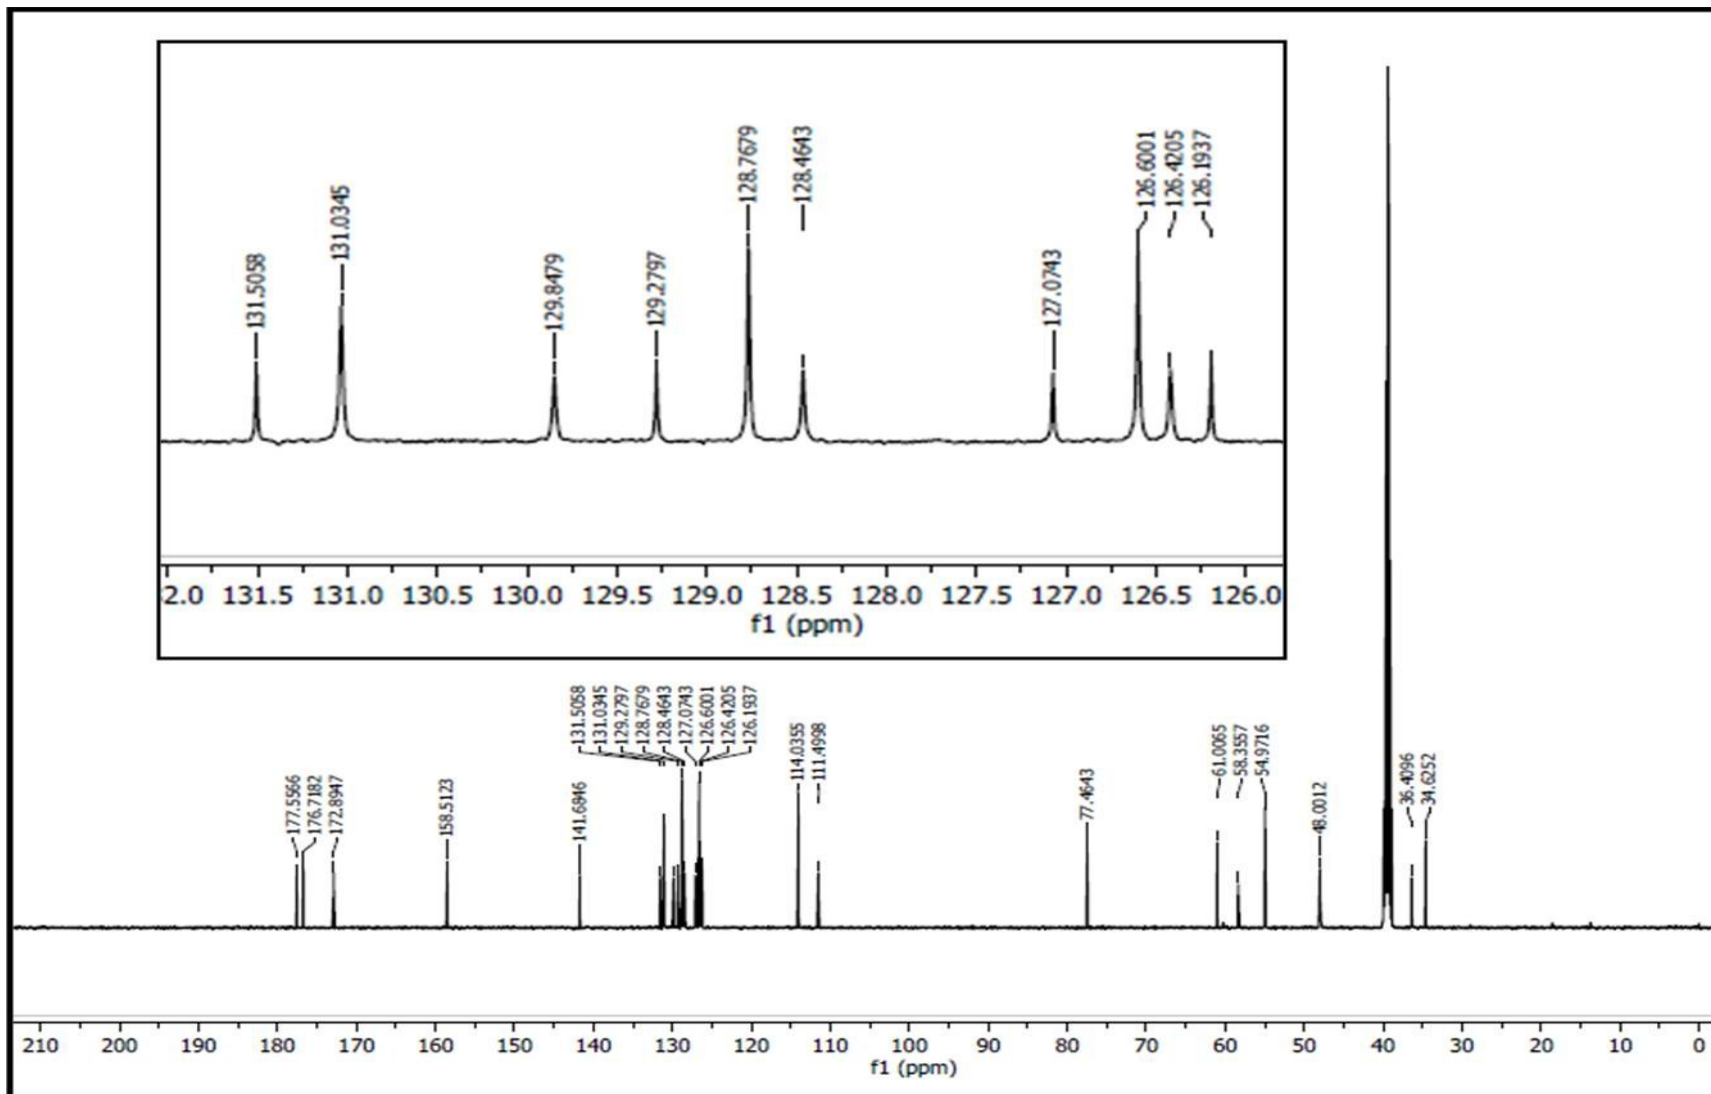

Fig. S19. <sup>13</sup>C-NMR spectrum of compound **8f** in DMSO-*d*<sub>6</sub>.



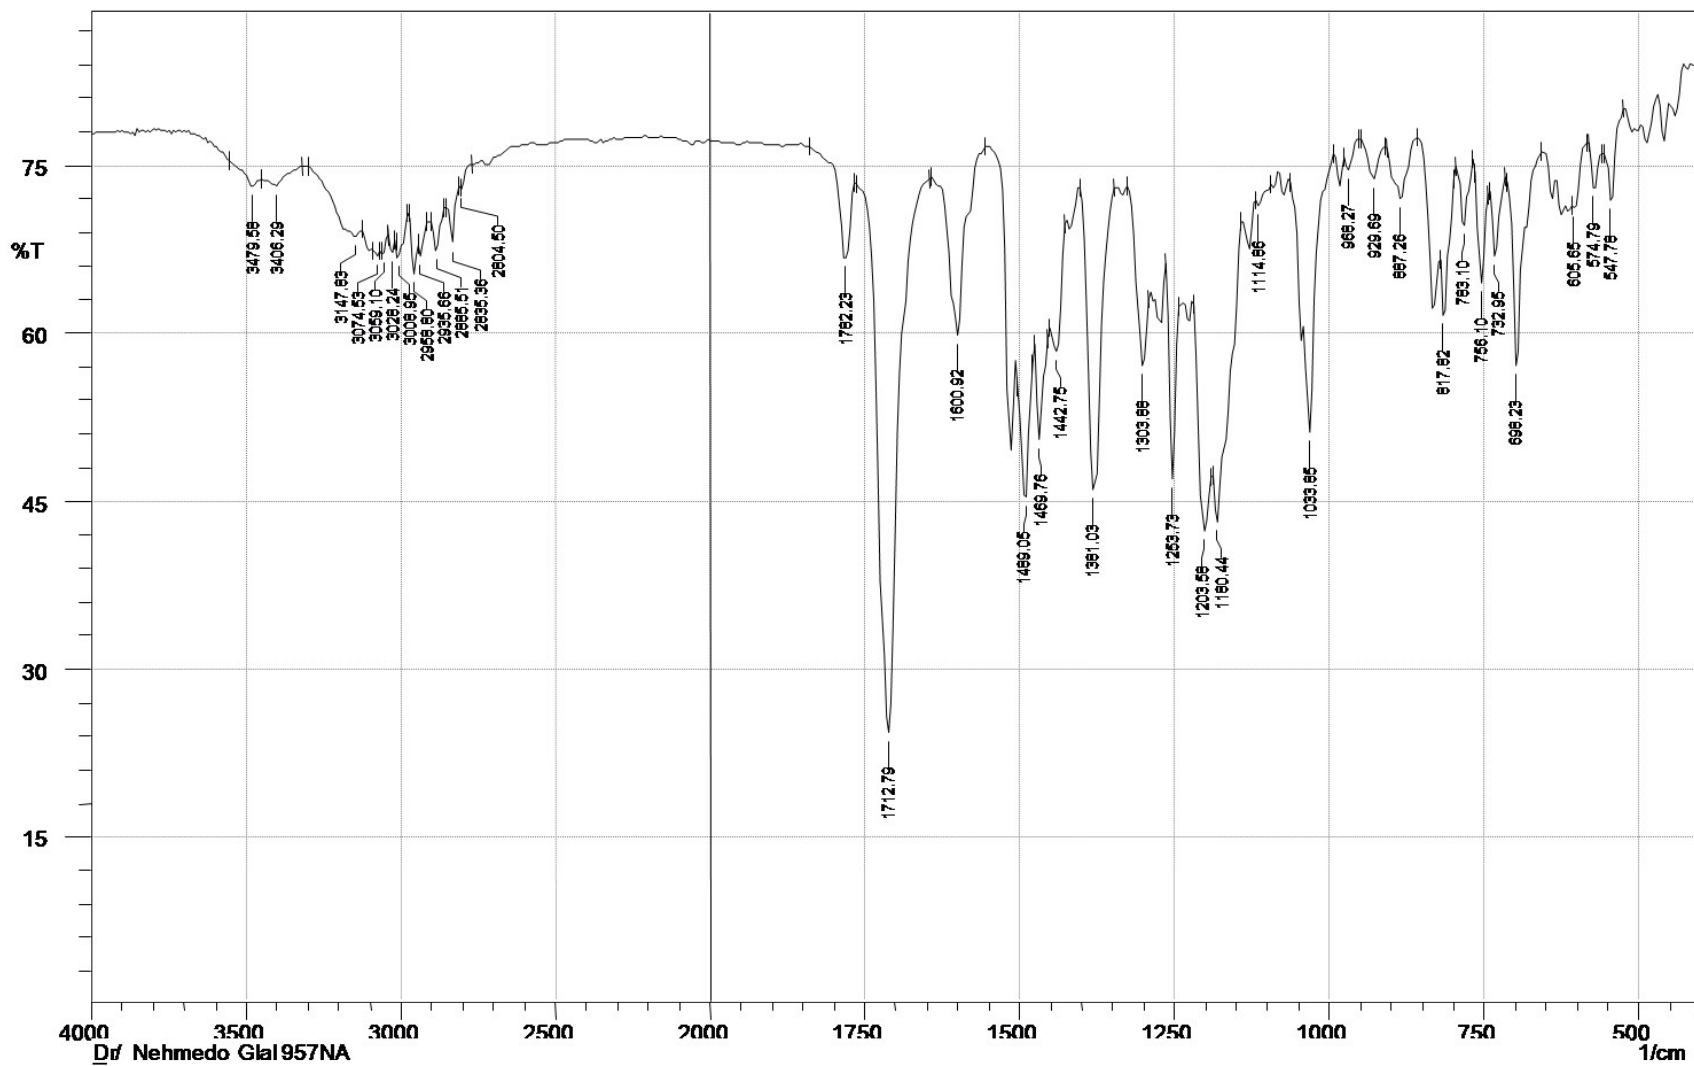

Fig. S20. IR spectrum of compound **8g** (KBr pellet).

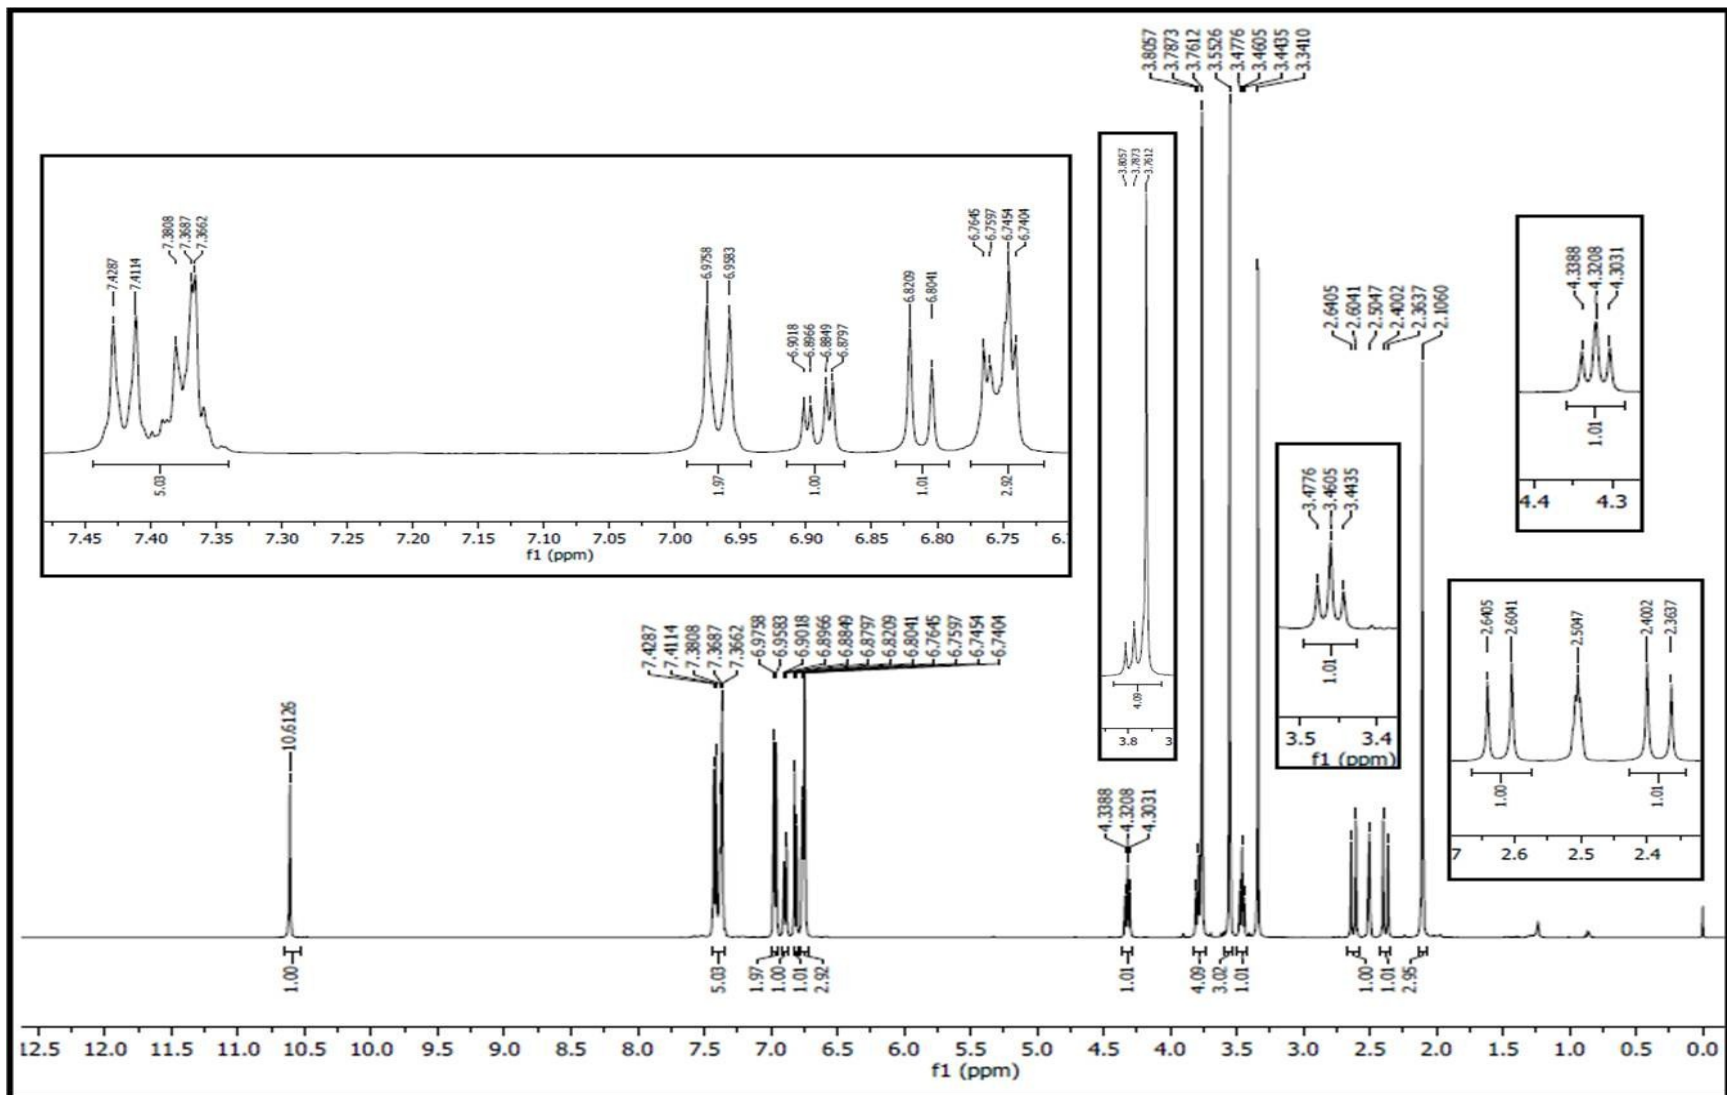

Fig. S21.  $^1\text{H-NMR}$  spectrum of compound **8g** in  $\text{DMSO-}d_6$ .

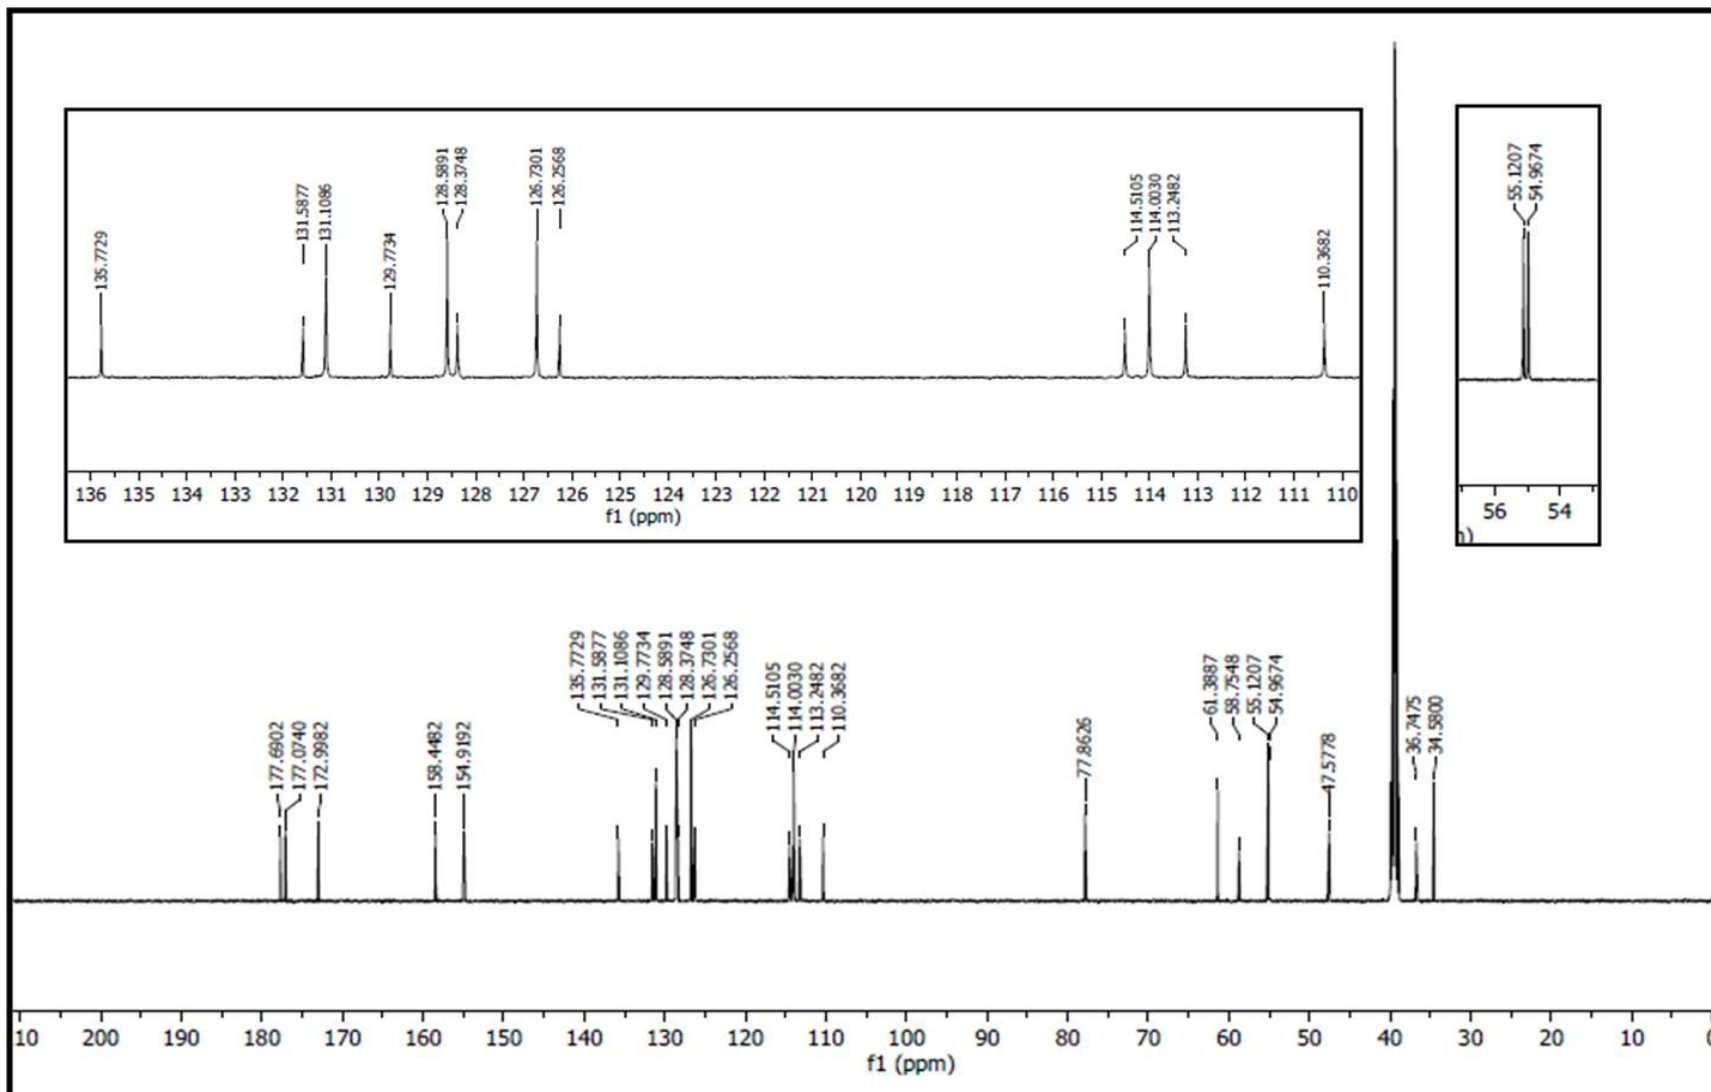

Fig. S22.  $^{13}\text{C}$ -NMR spectrum of compound **8g** in  $\text{DMSO-}d_6$ .

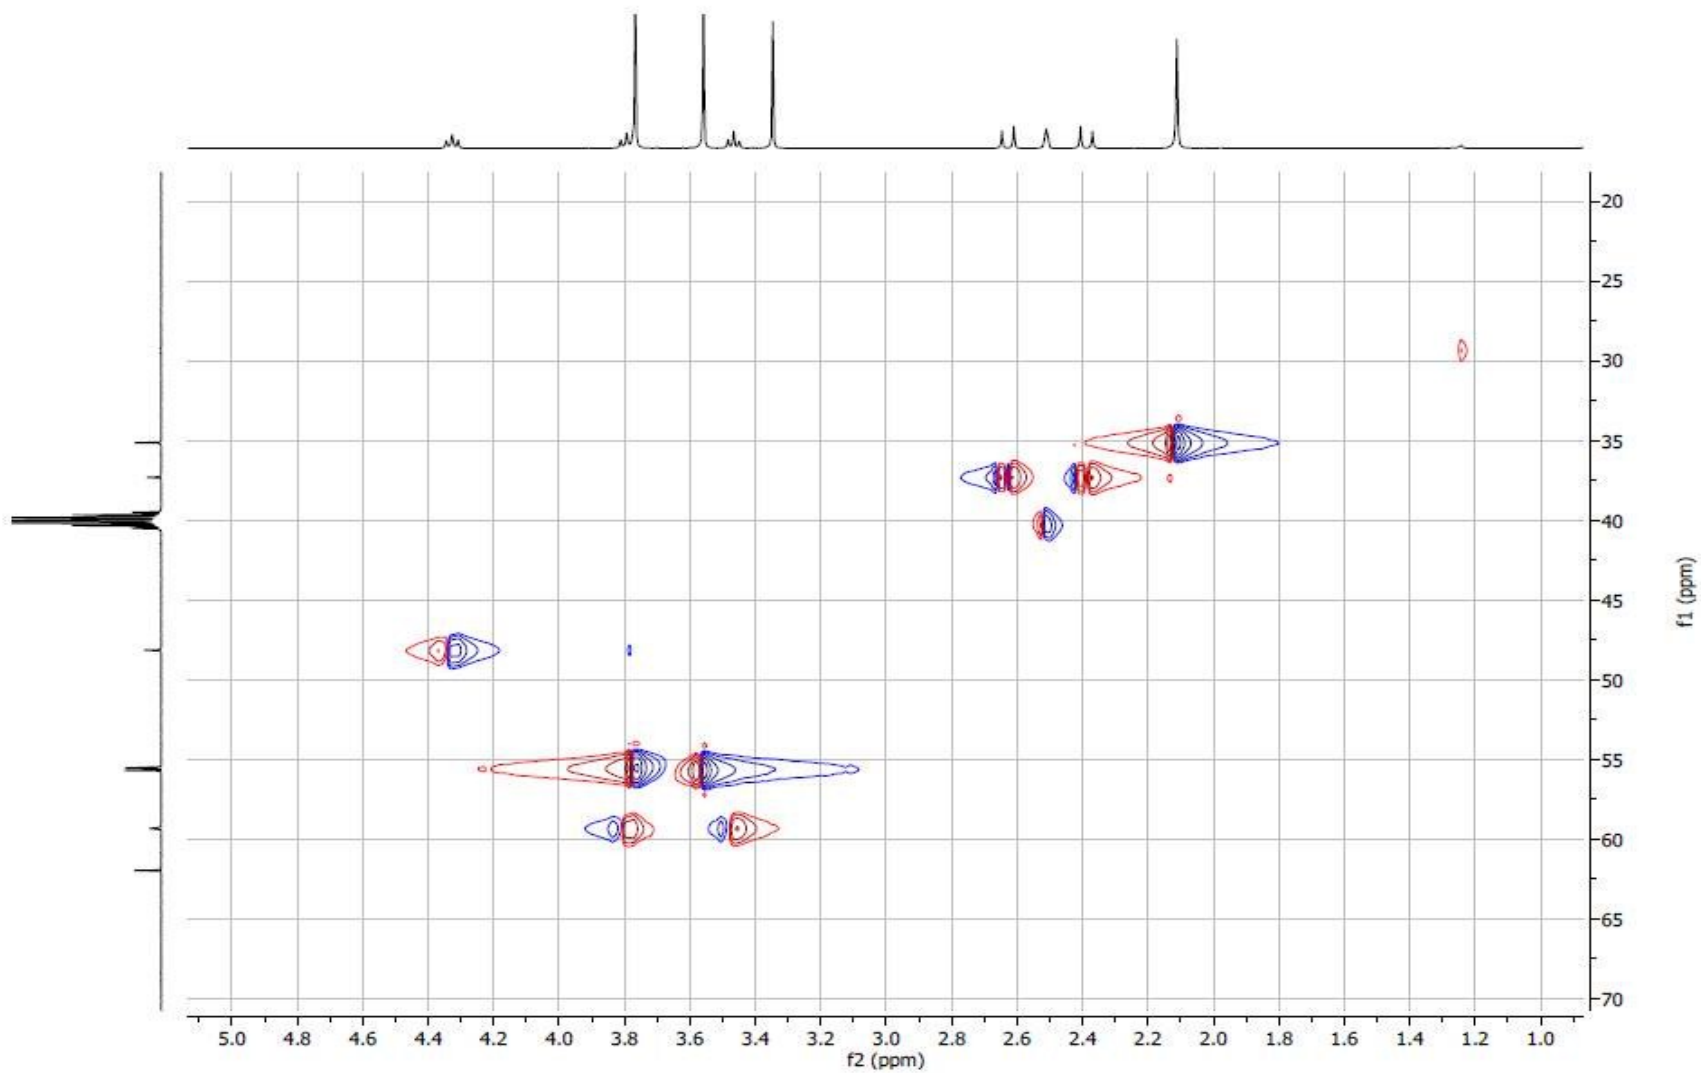

**Fig. S23.** HSQC spectrum of compound **8g** in  $\text{DMSO-}d_6$ .

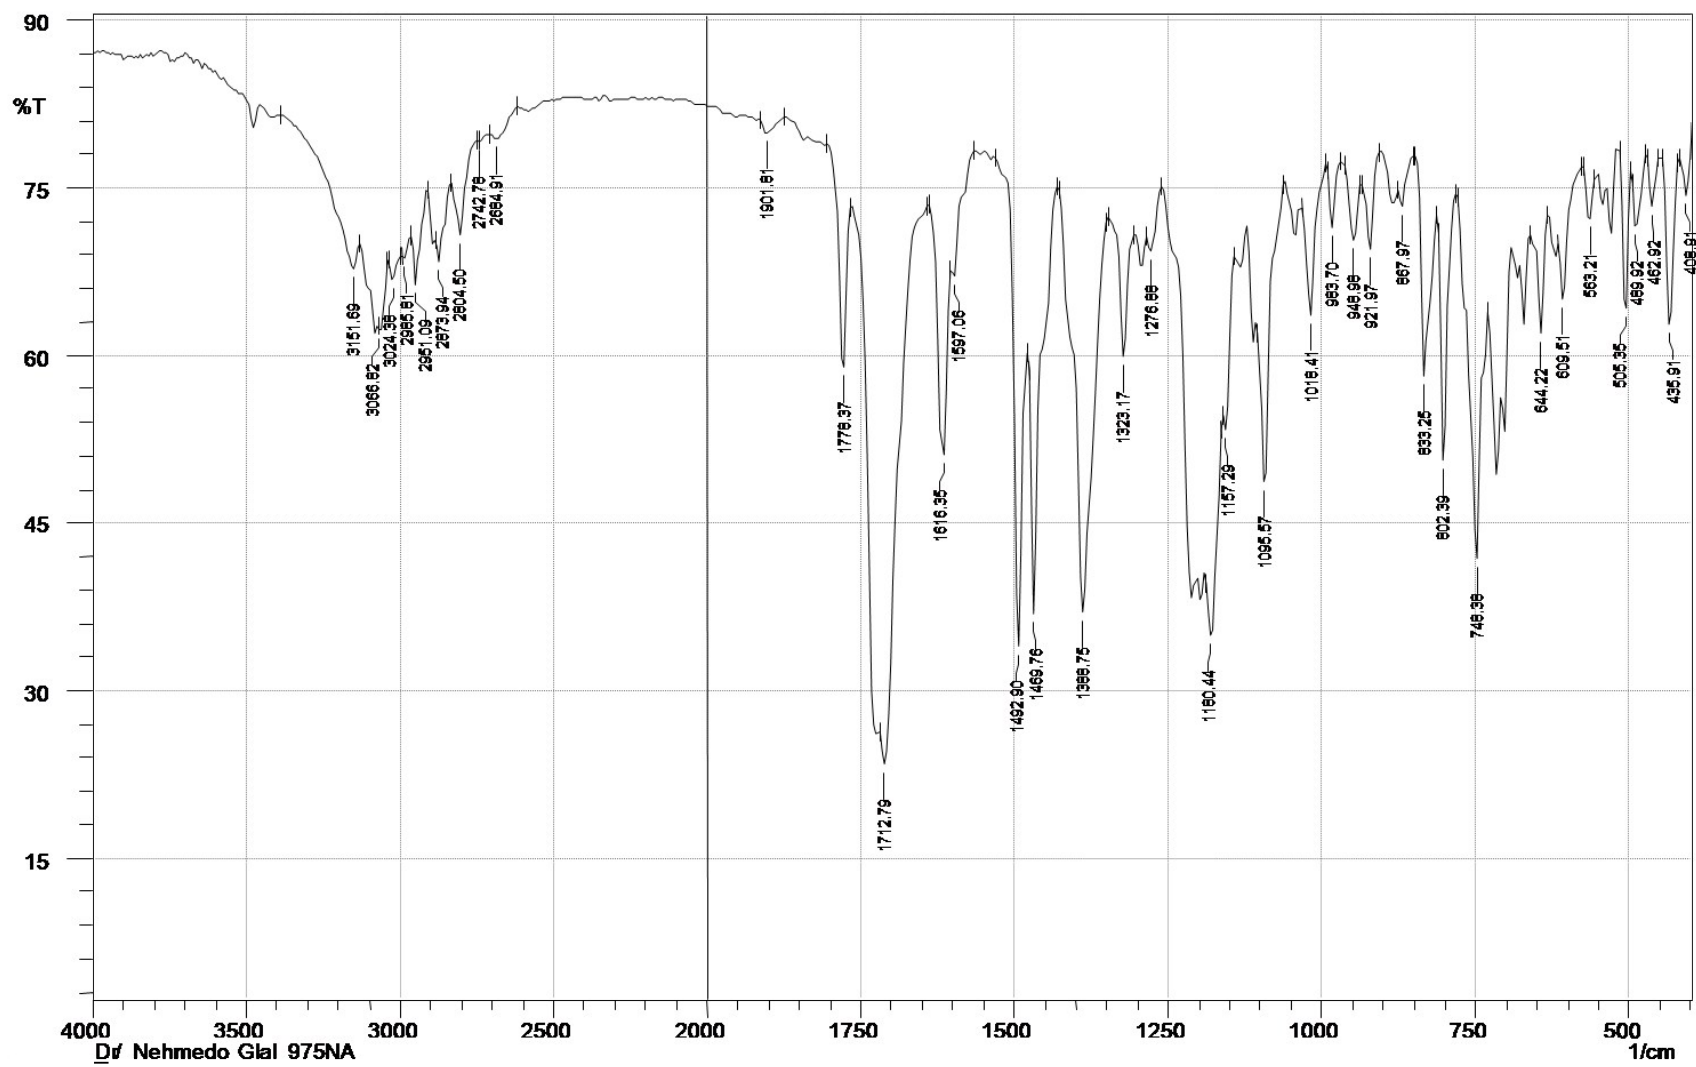

Fig. S24. IR spectrum of compound **8h** (KBr pellet).

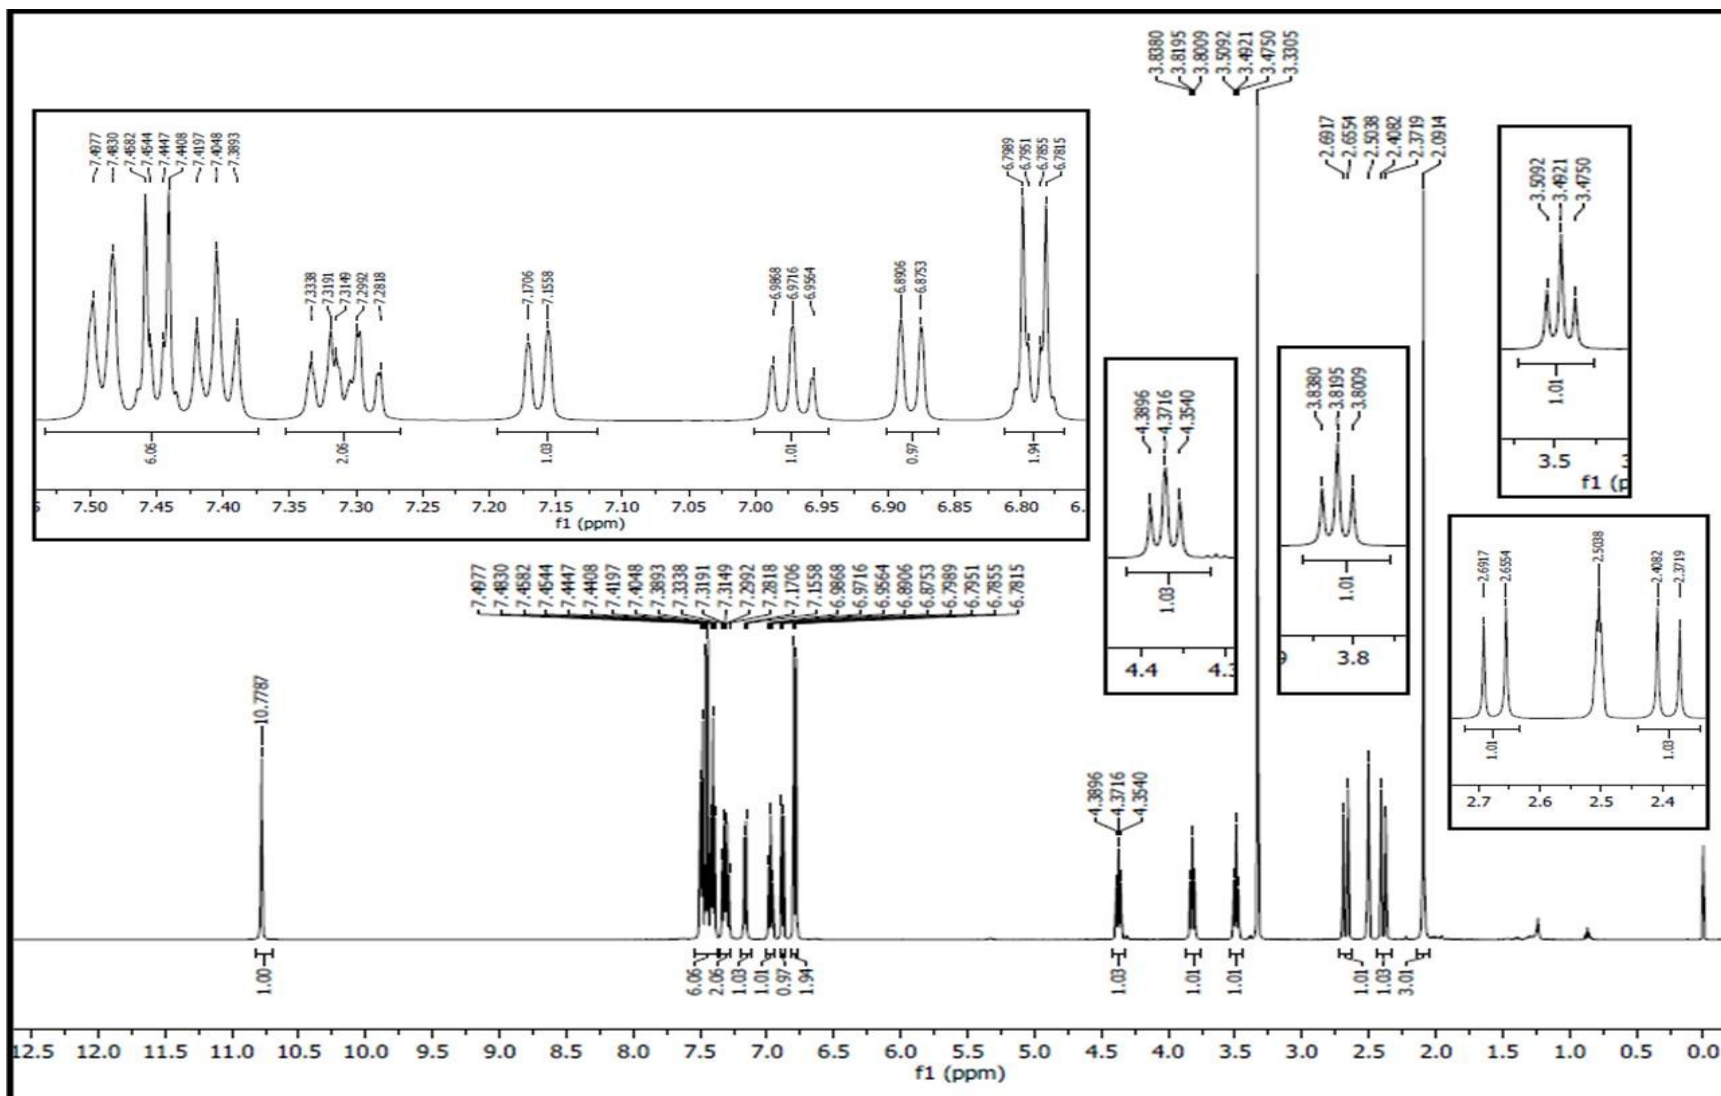

Fig. S25.  $^1\text{H-NMR}$  spectrum of compound **8h** in  $\text{DMSO-}d_6$ .

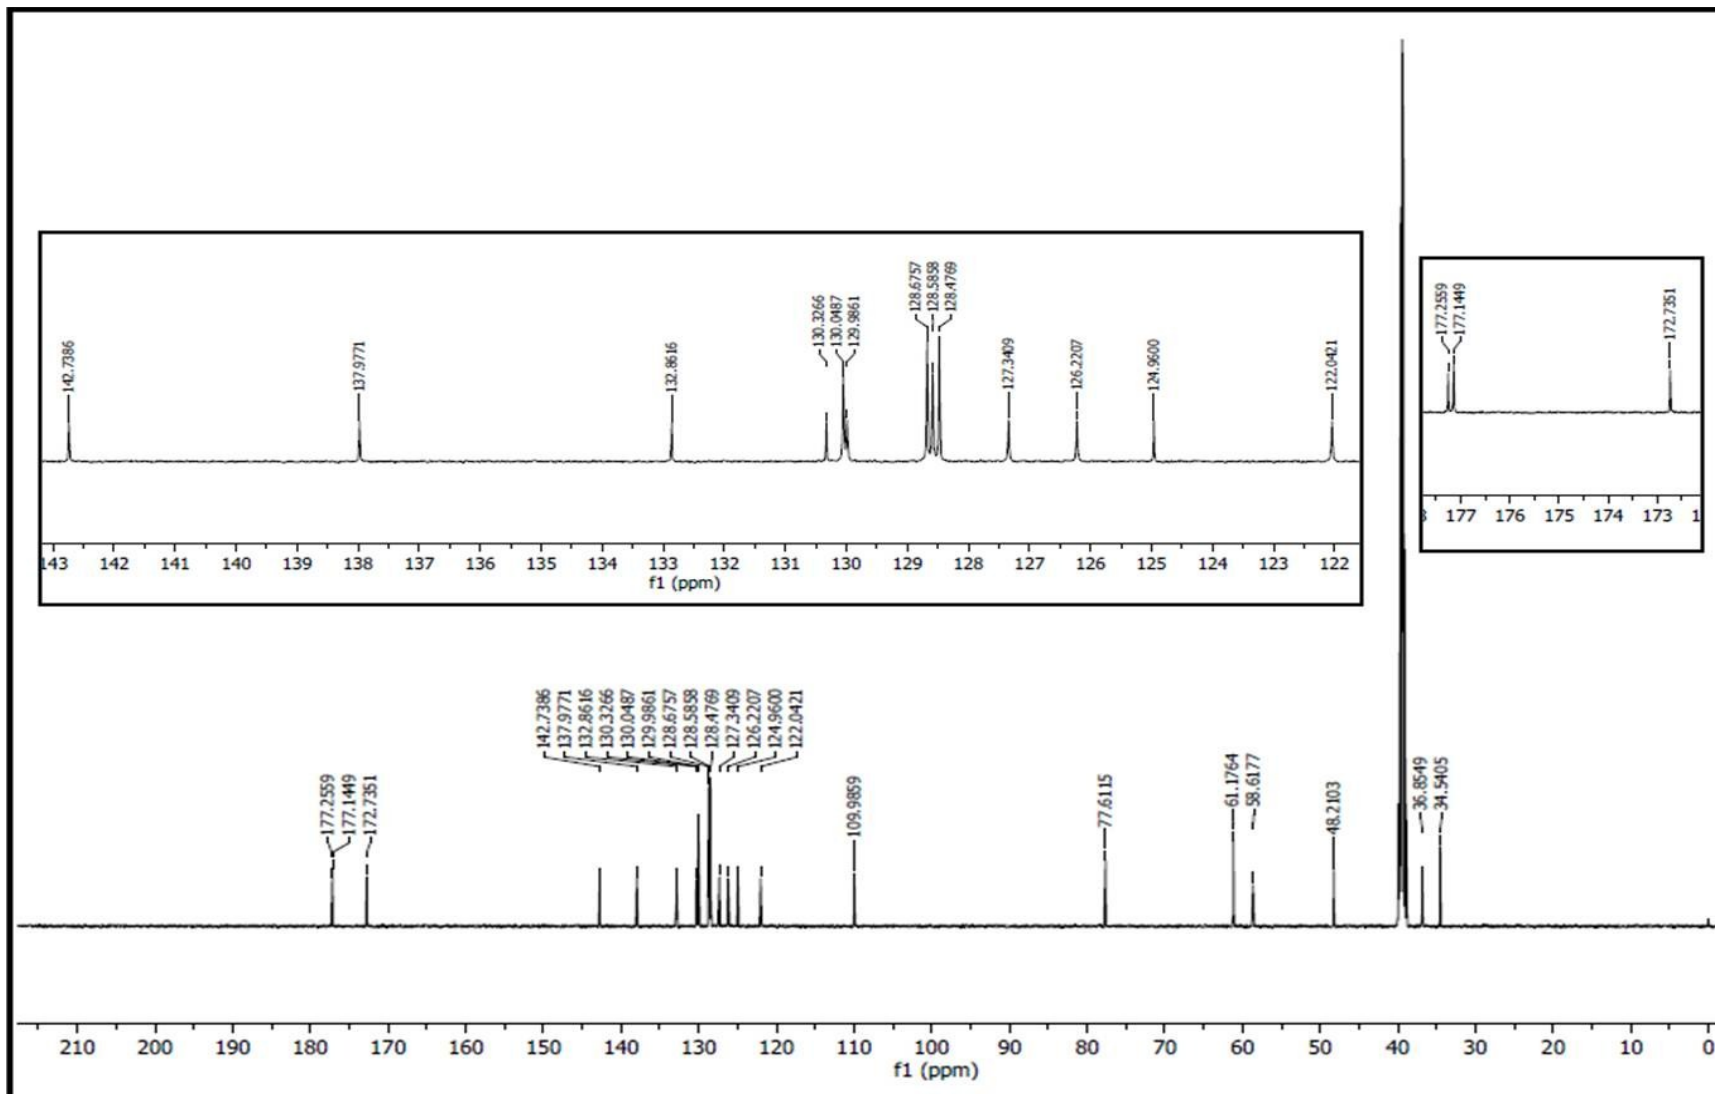

**Fig. S26.**  $^{13}\text{C}$ -NMR spectrum of compound **8h** in  $\text{DMSO-}d_6$ .

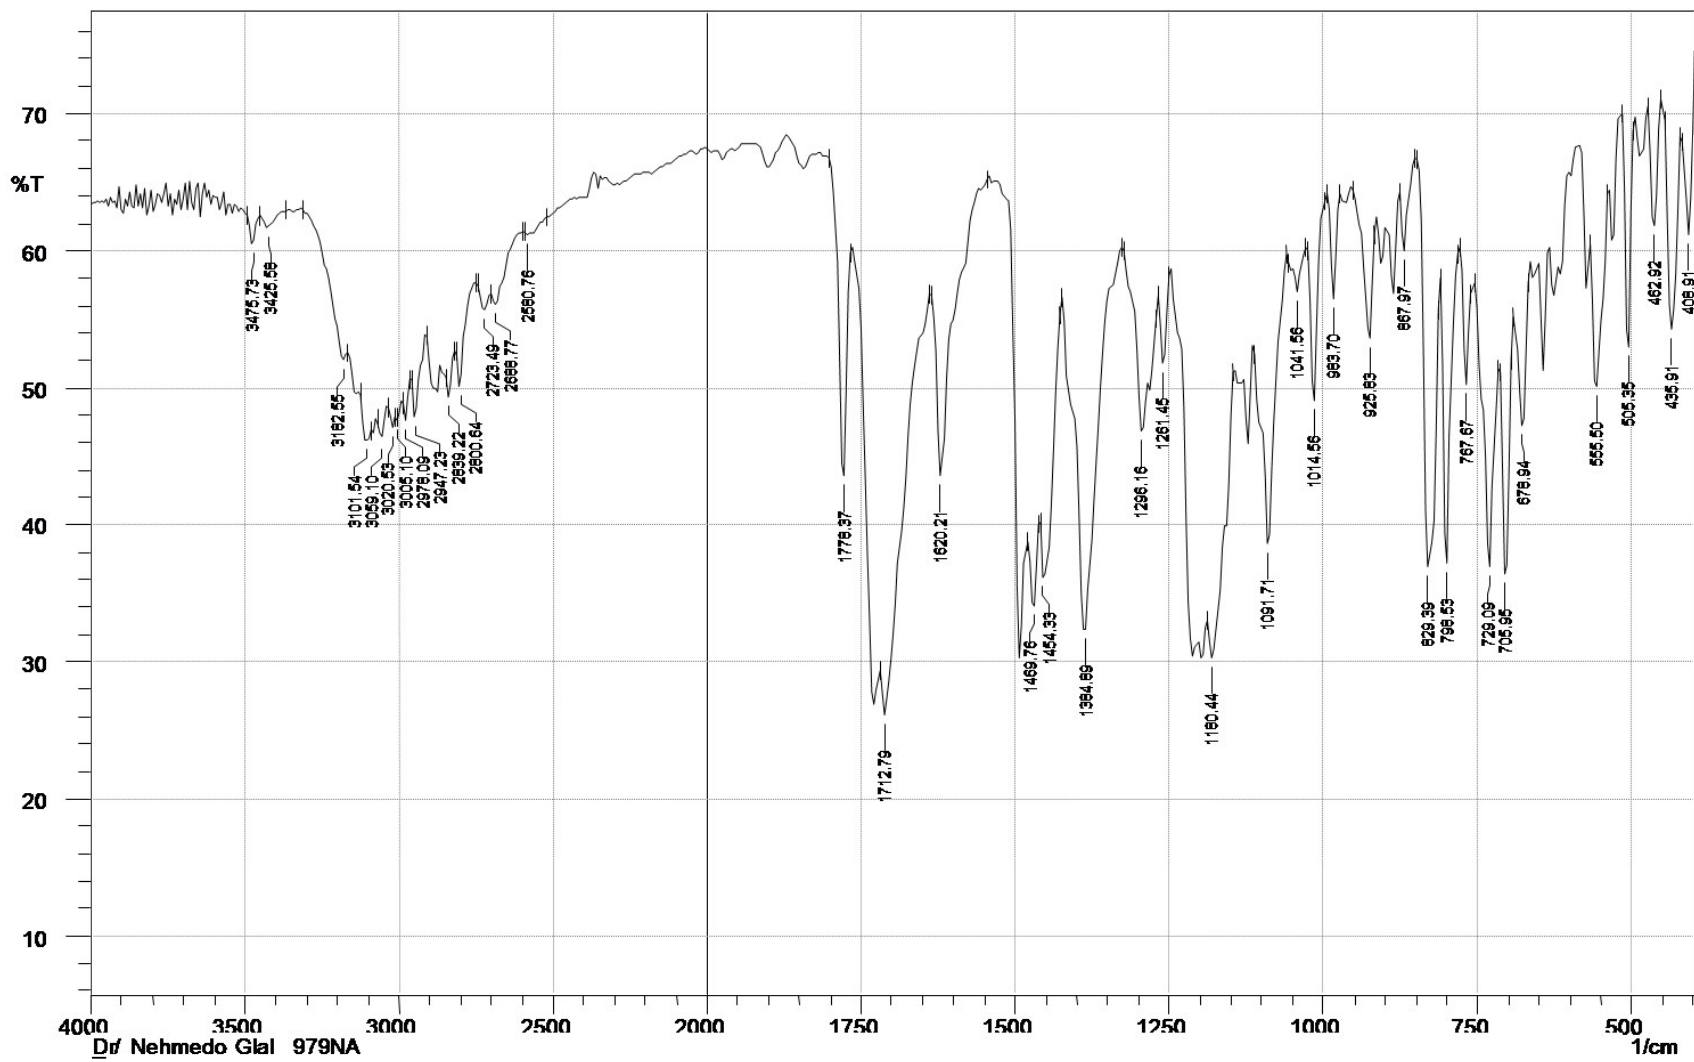

Fig. S27. IR spectrum of compound **8i** (KBr pellet).



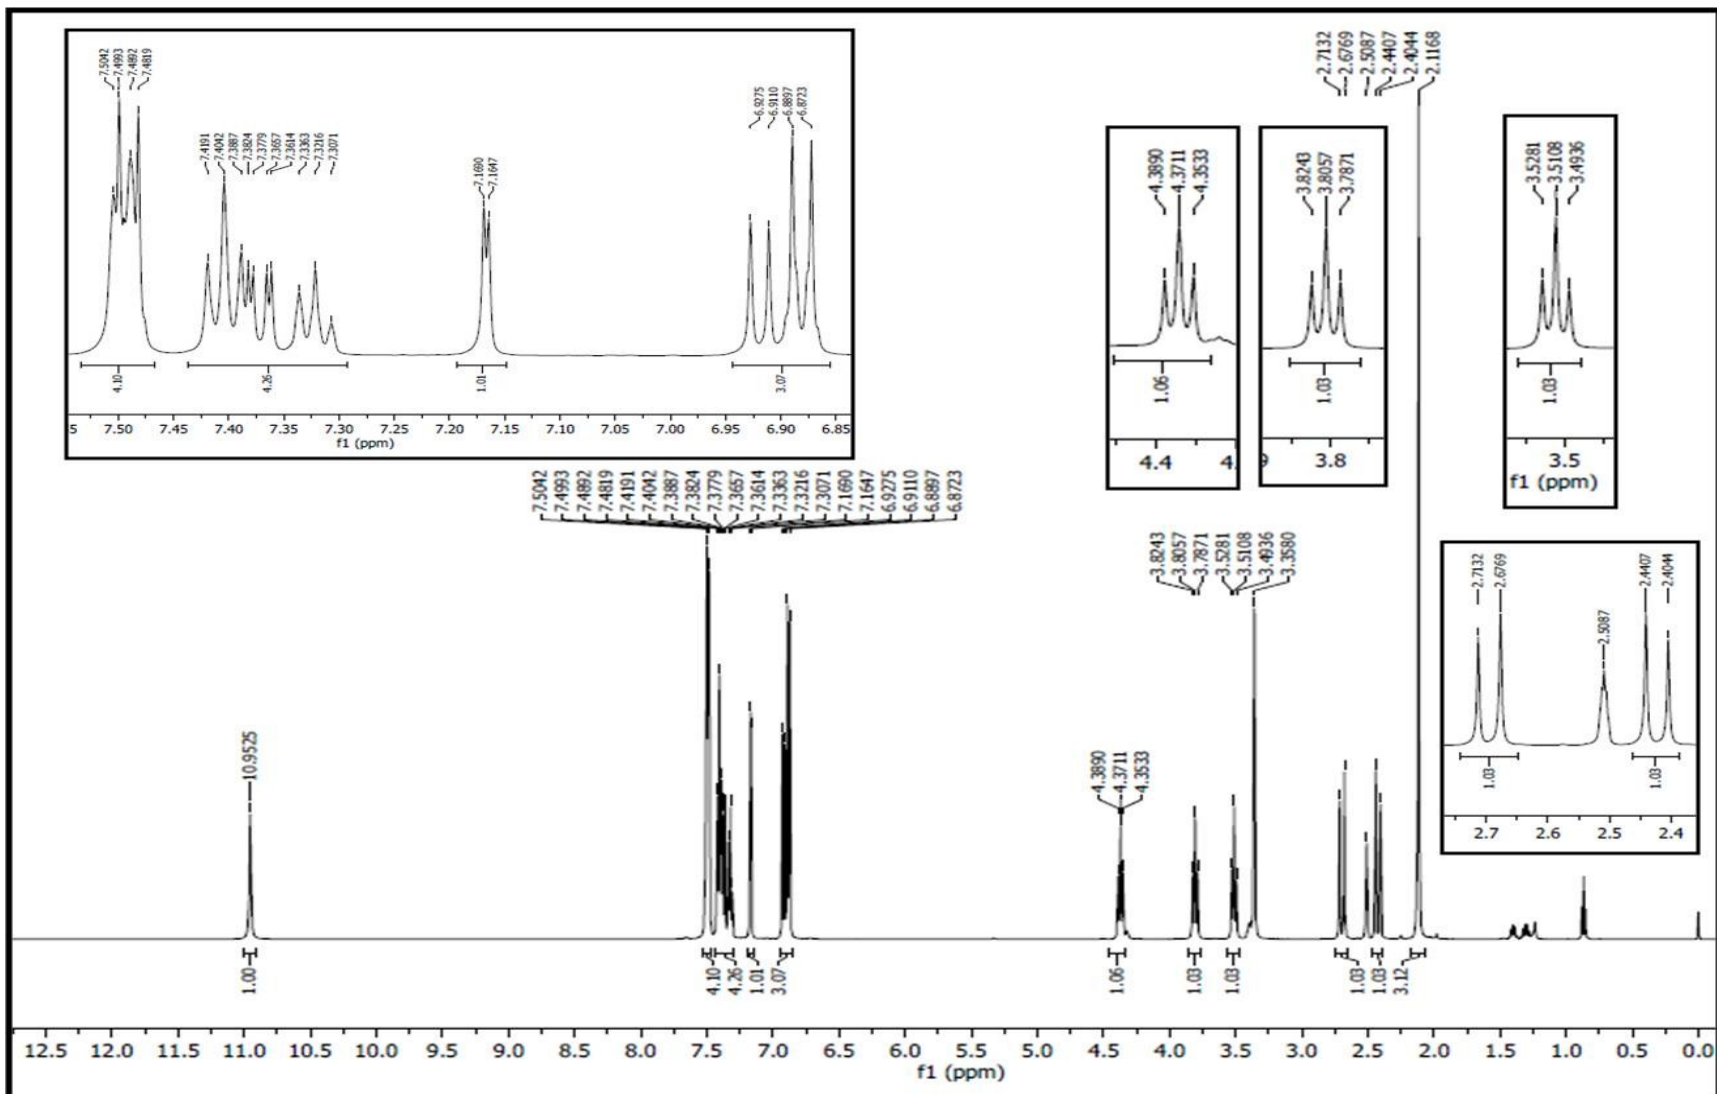

Fig. S28. <sup>1</sup>H-NMR spectrum of compound **8i** in DMSO-*d*<sub>6</sub>.

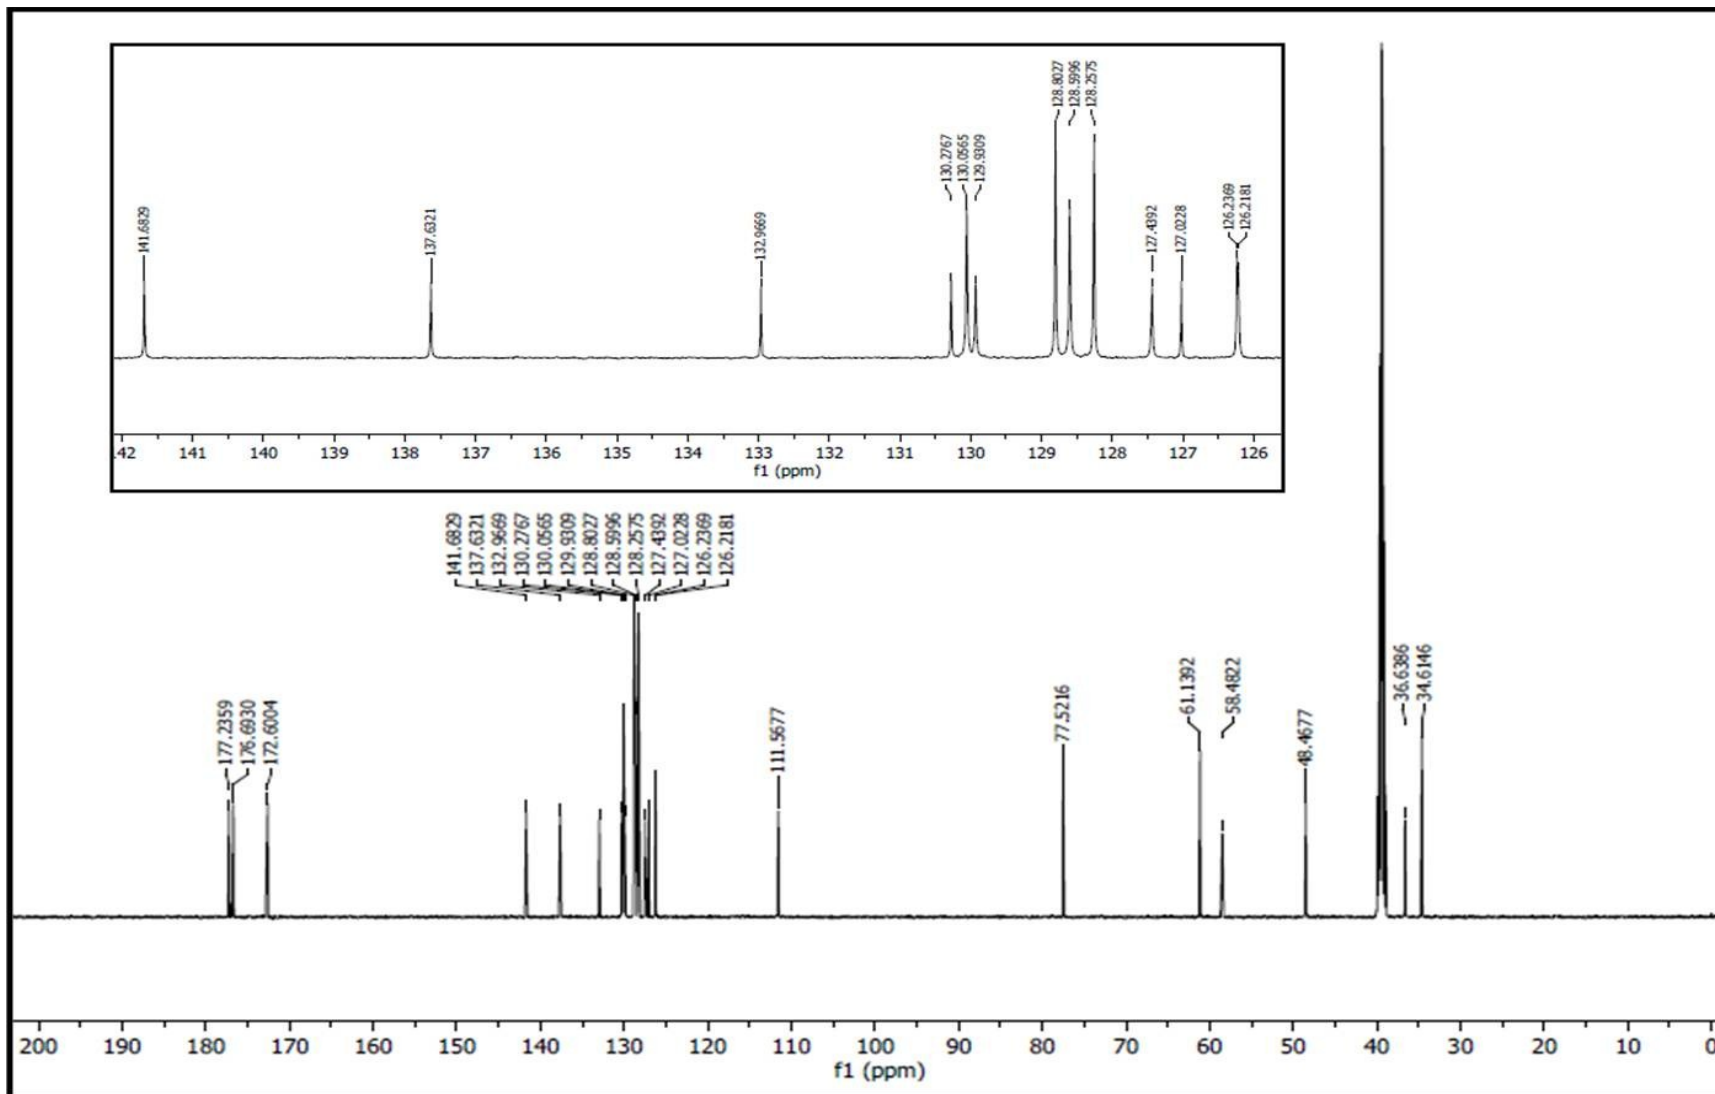

Fig. S29.  $^{13}\text{C}$ -NMR spectrum of compound **8i** in  $\text{DMSO-}d_6$ .

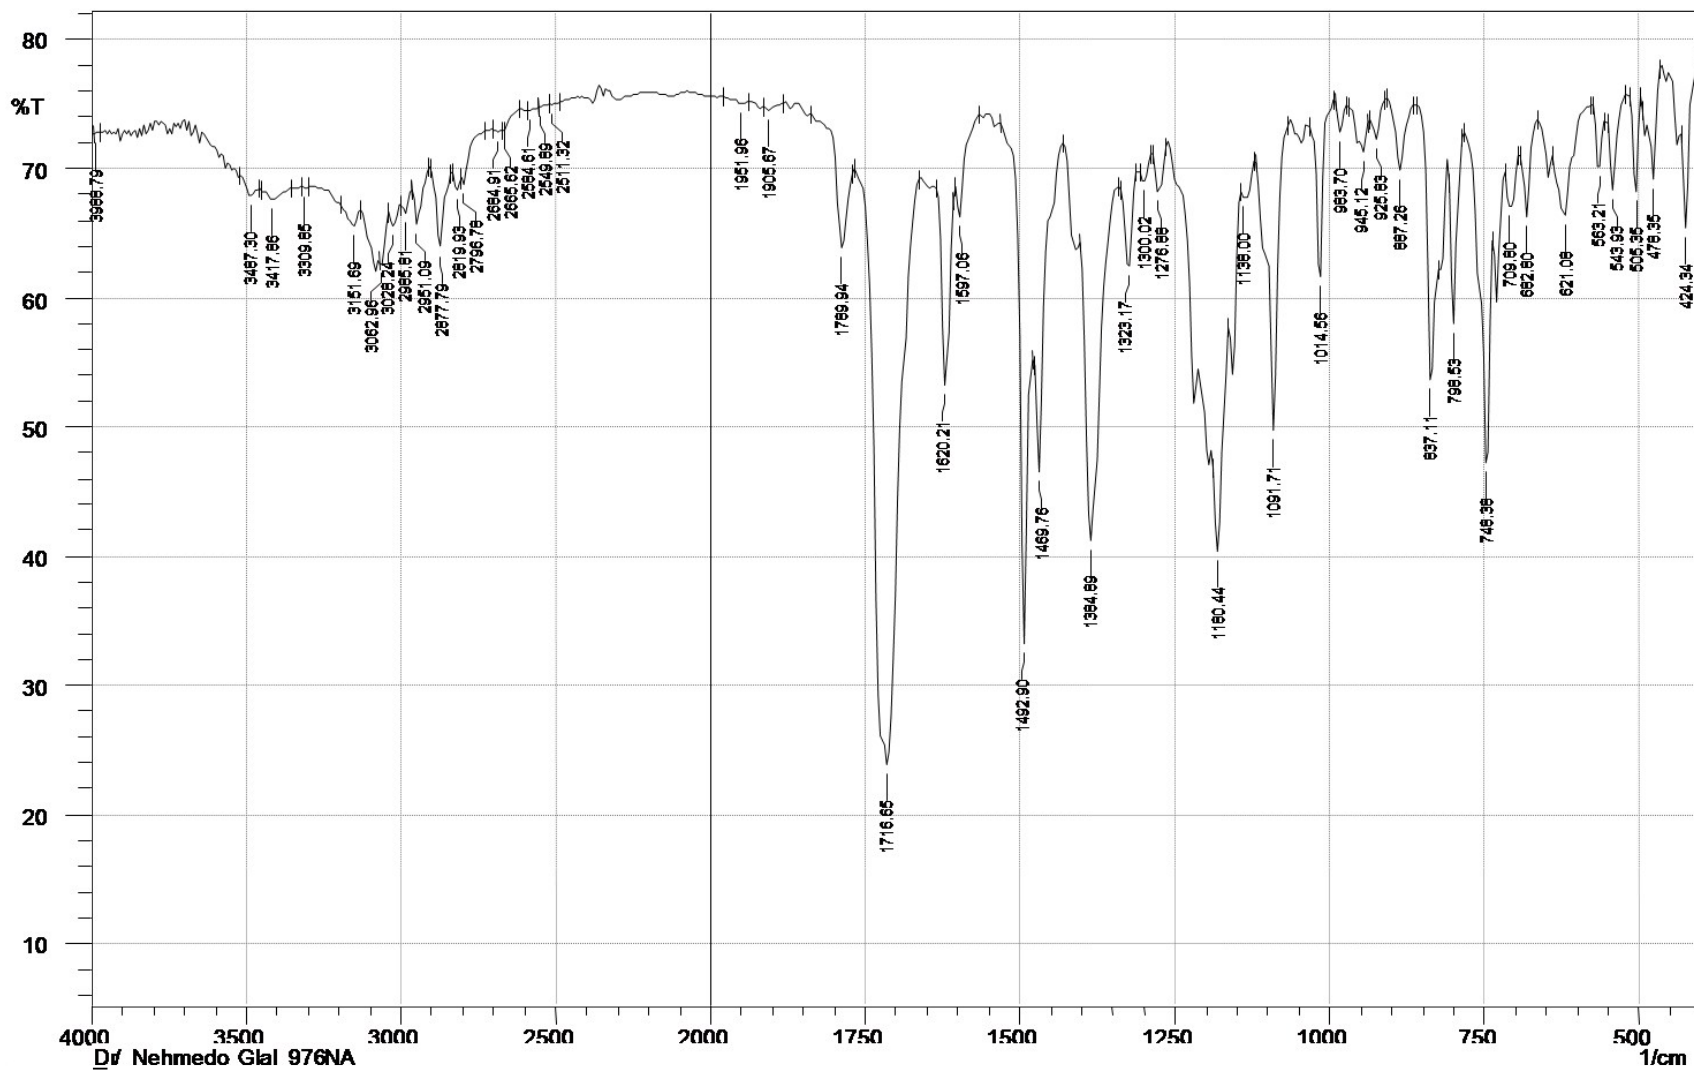

Fig. S30. IR spectrum of compound **8j** (KBr pellet).

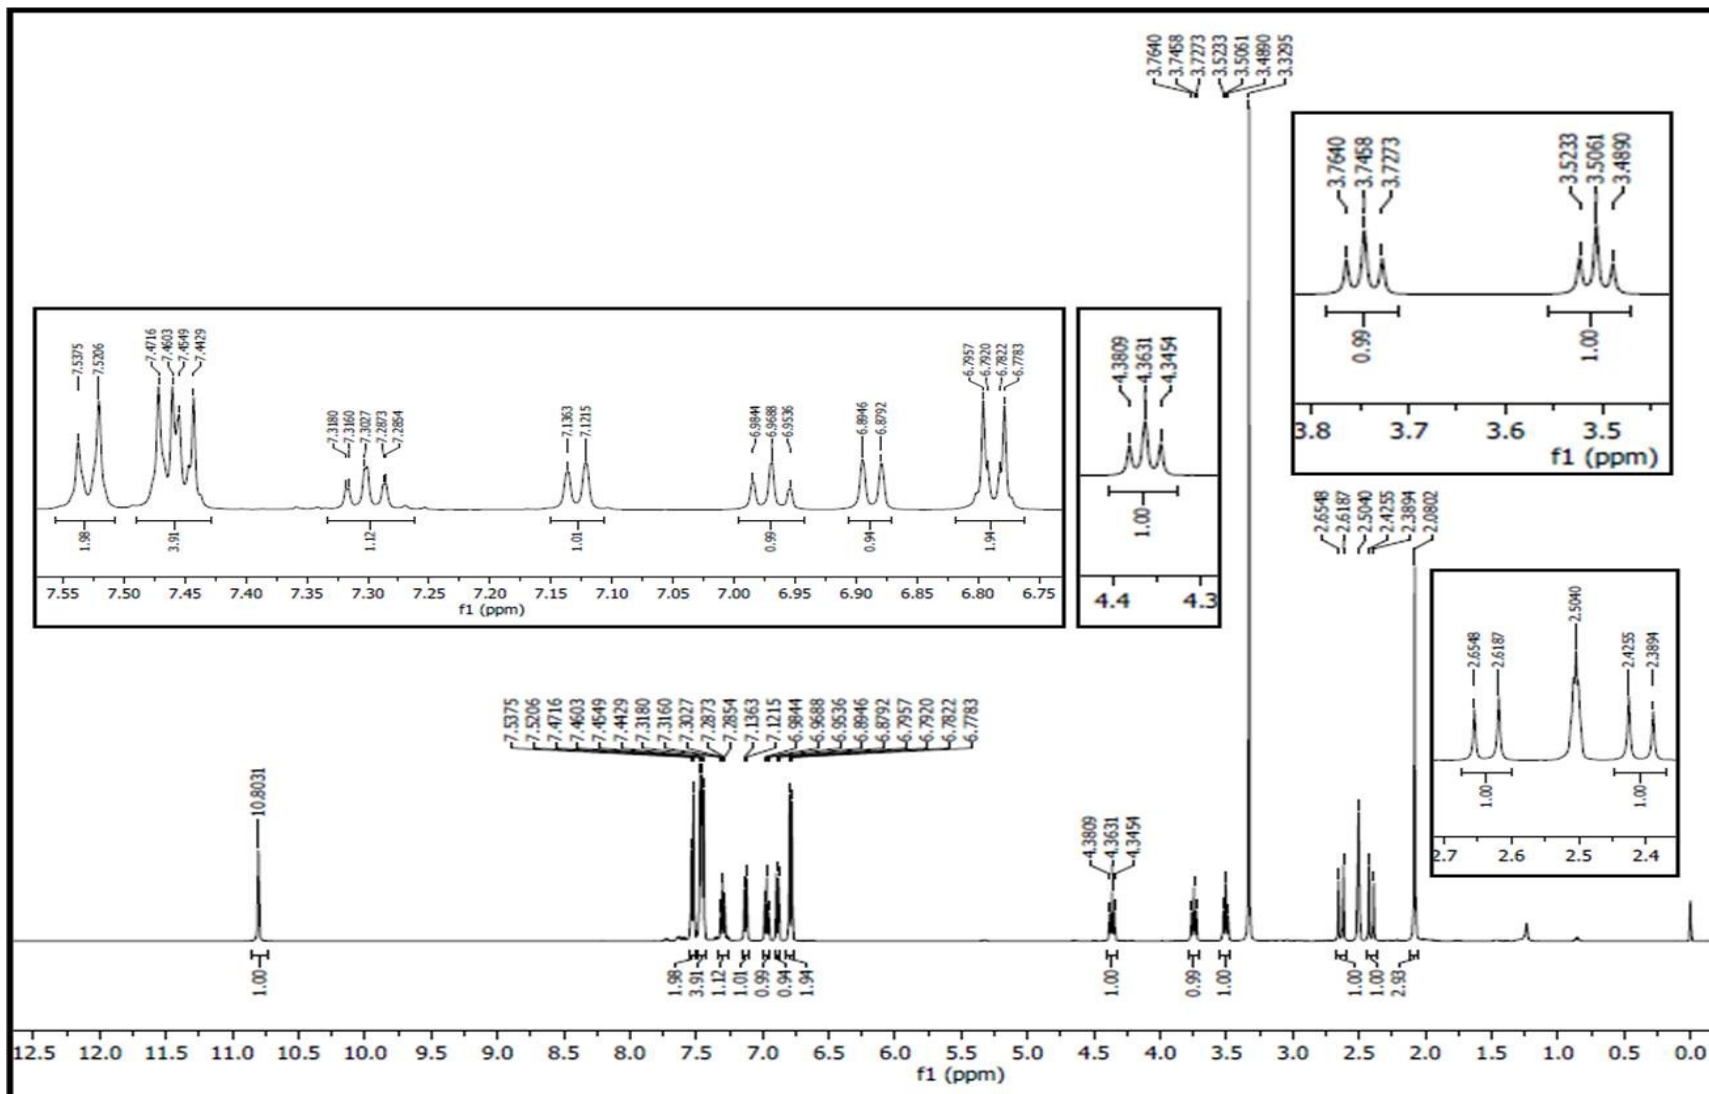

Fig. S31.  $^1\text{H-NMR}$  spectrum of compound **8j** in  $\text{DMSO-}d_6$ .

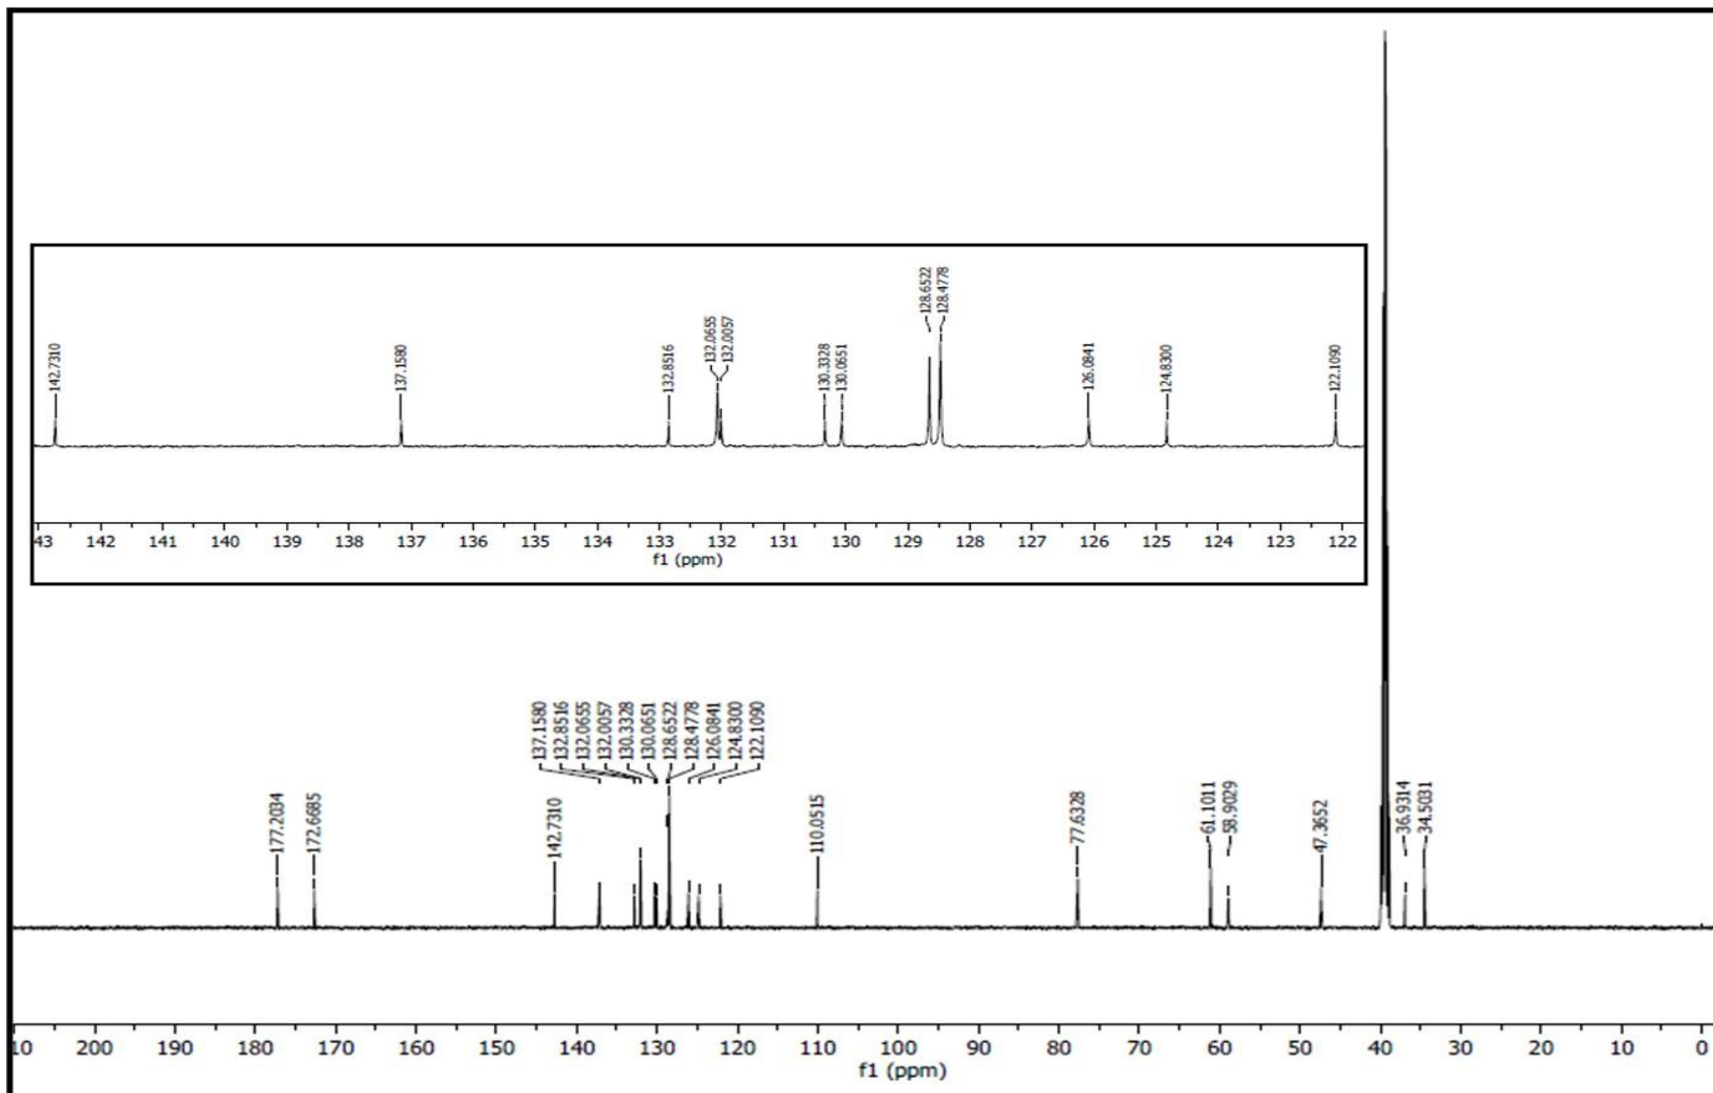

**Fig. S32.**  $^{13}\text{C}$ -NMR spectrum of compound **8j** in  $\text{DMSO-}d_6$ .

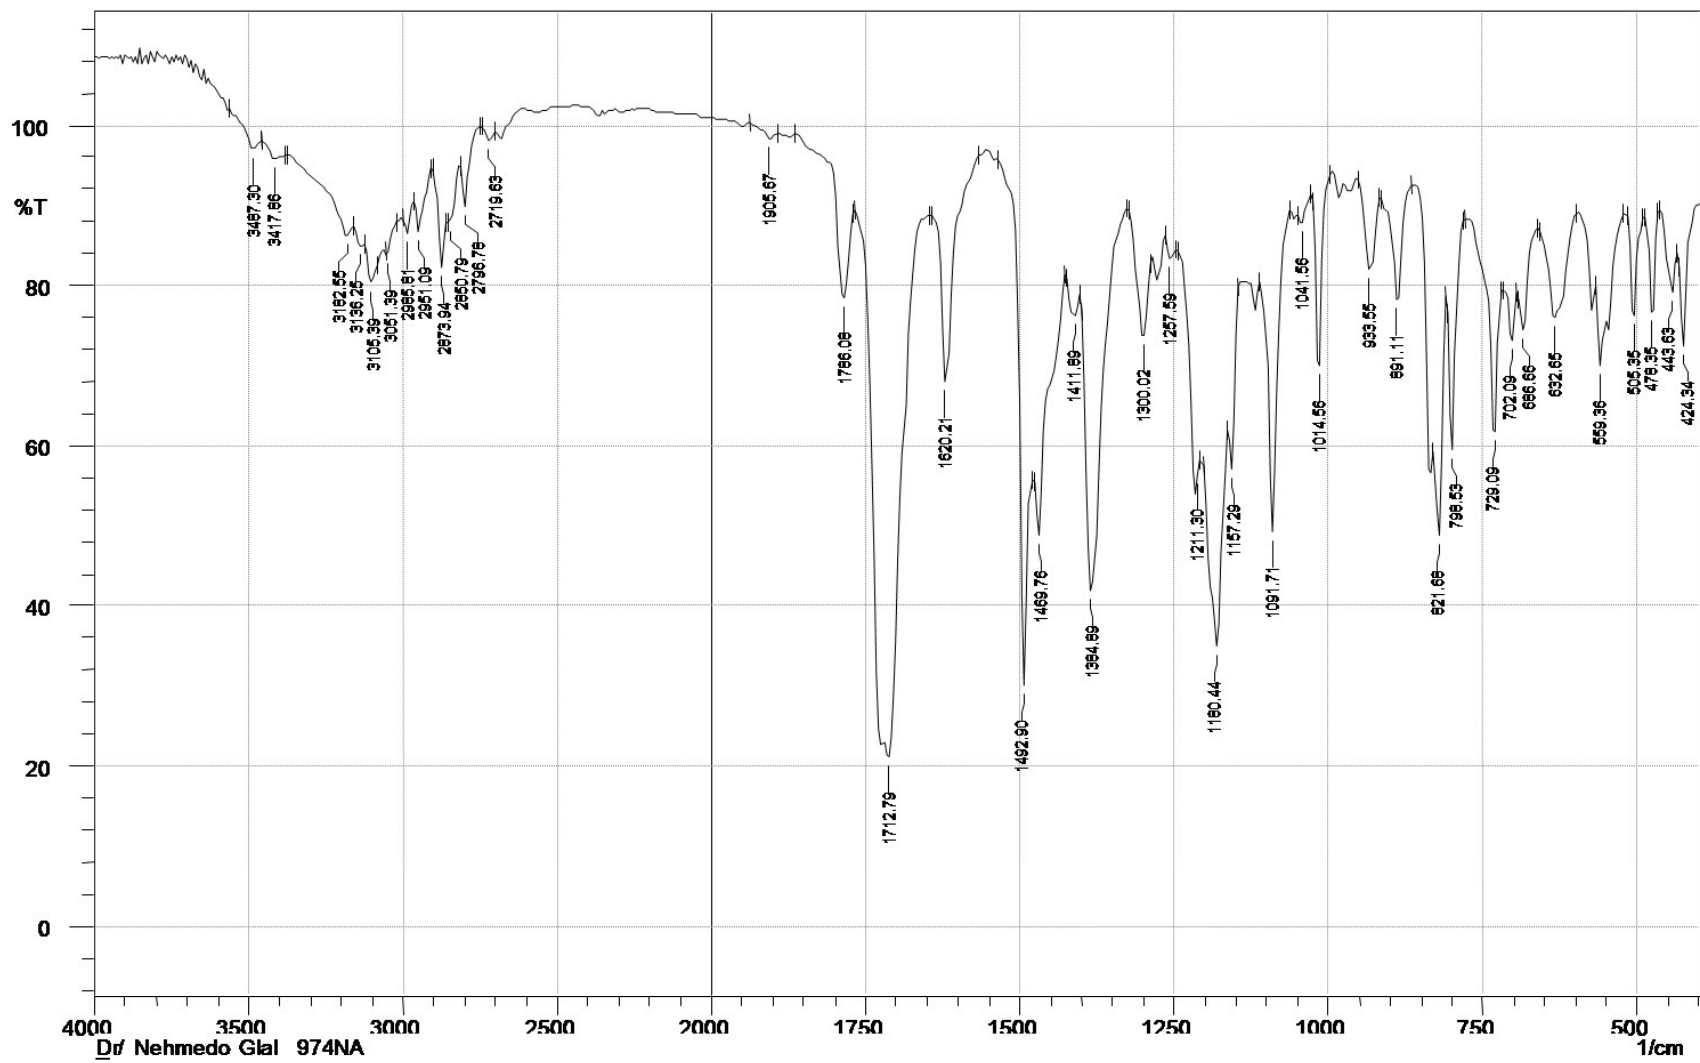

Fig. S33. IR spectrum of compound **8k** (KBr pellet).

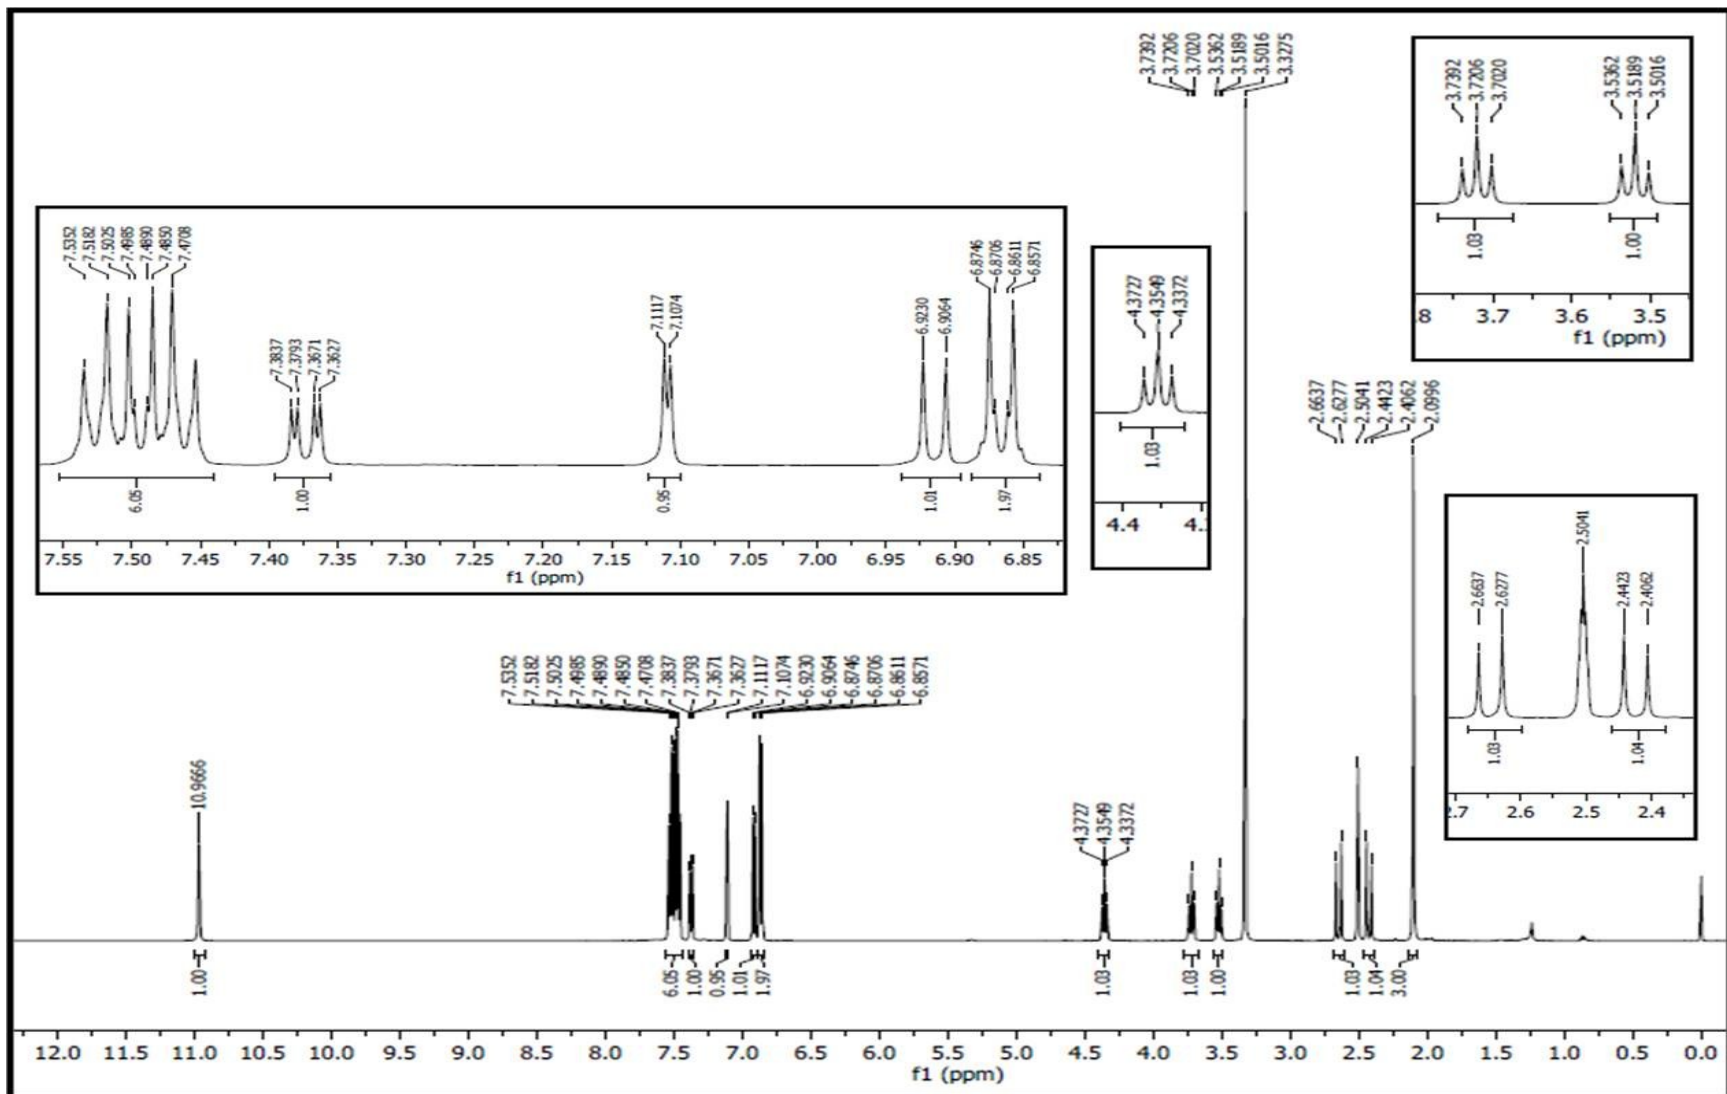

Fig. S34.  $^1\text{H-NMR}$  spectrum of compound **8k** in  $\text{DMSO-}d_6$ .

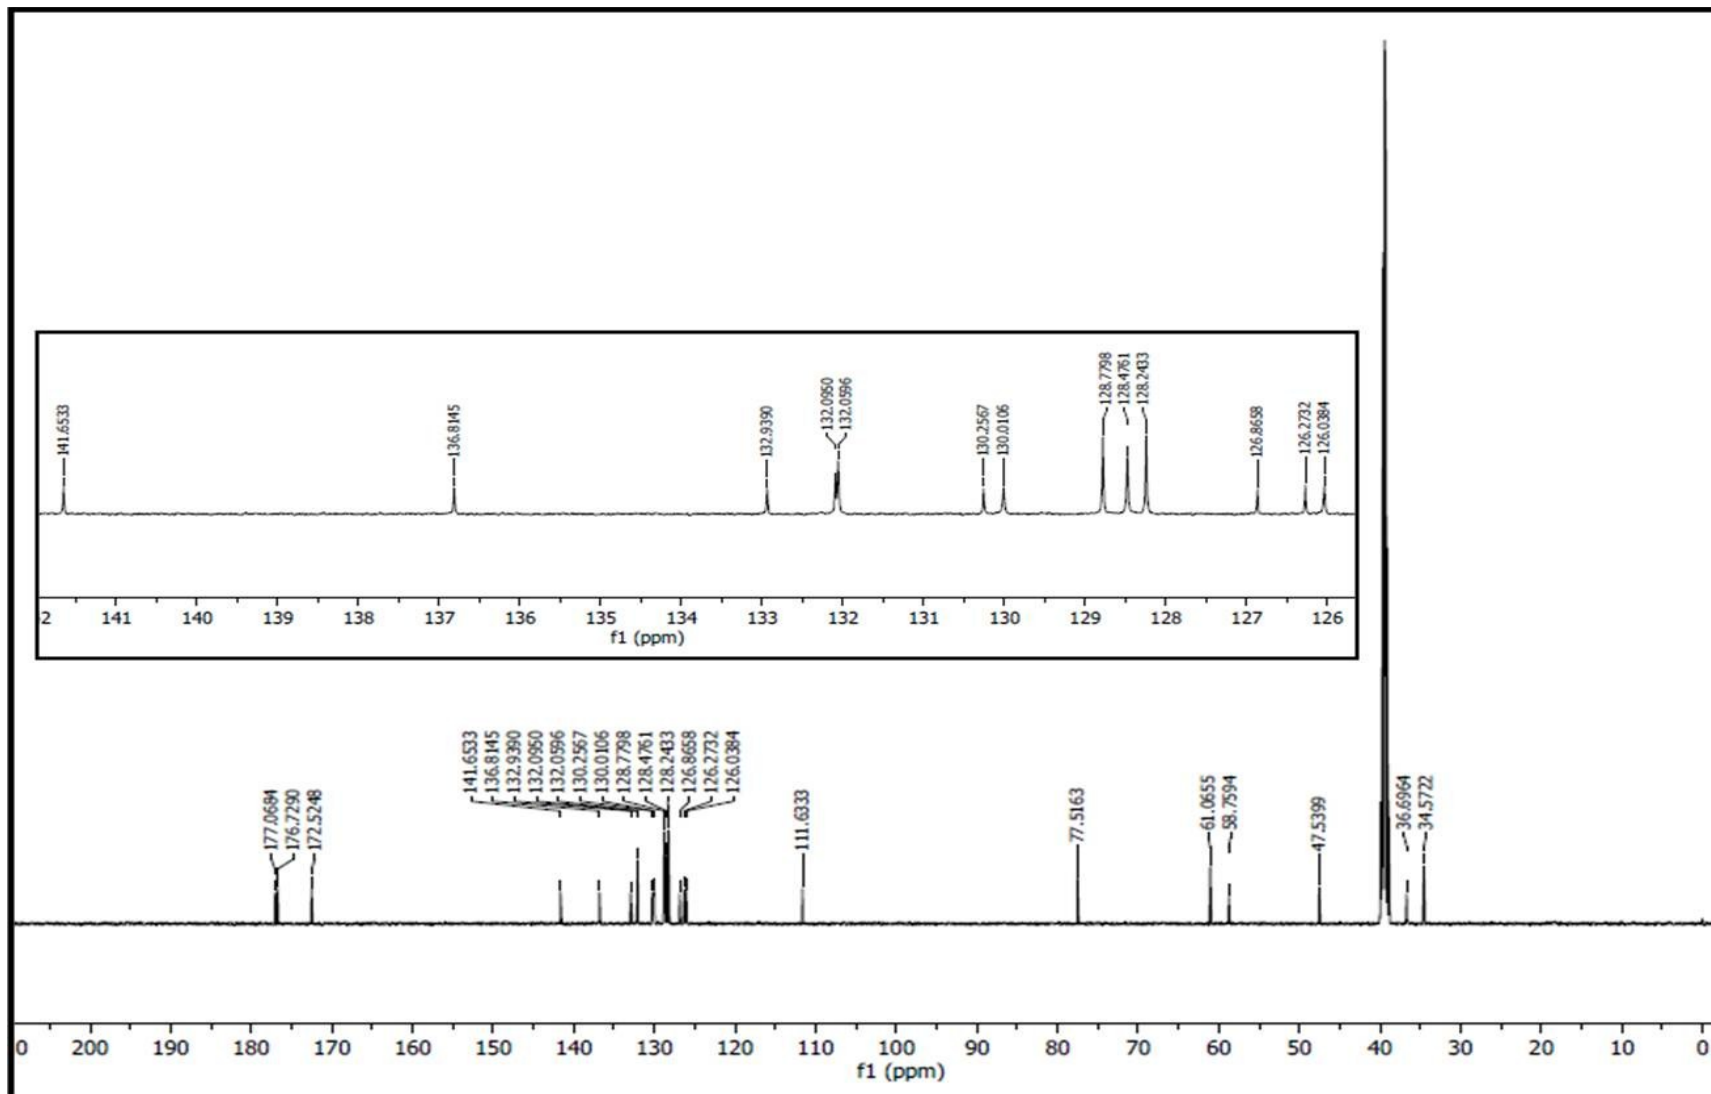

Fig. S35. <sup>13</sup>C-NMR spectrum of compound **8k** in DMSO-*d*<sub>6</sub>.



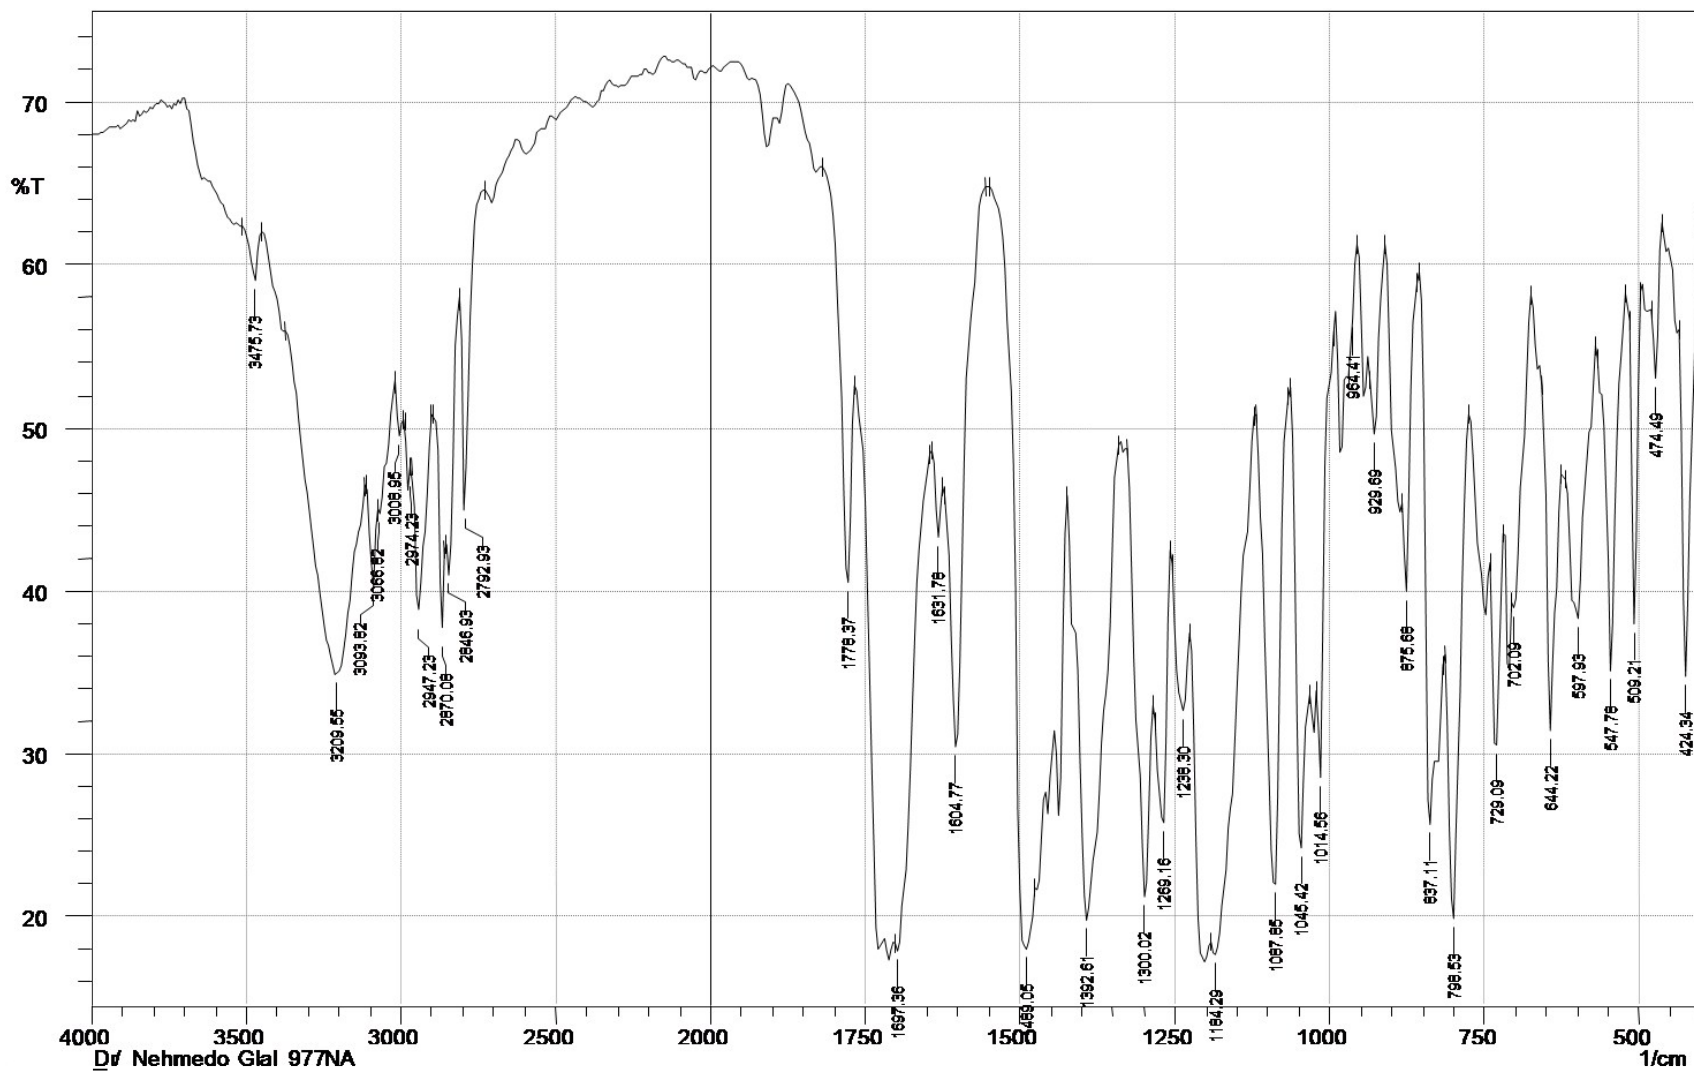

Fig. S36. IR spectrum of compound 81 (KBr pellet).

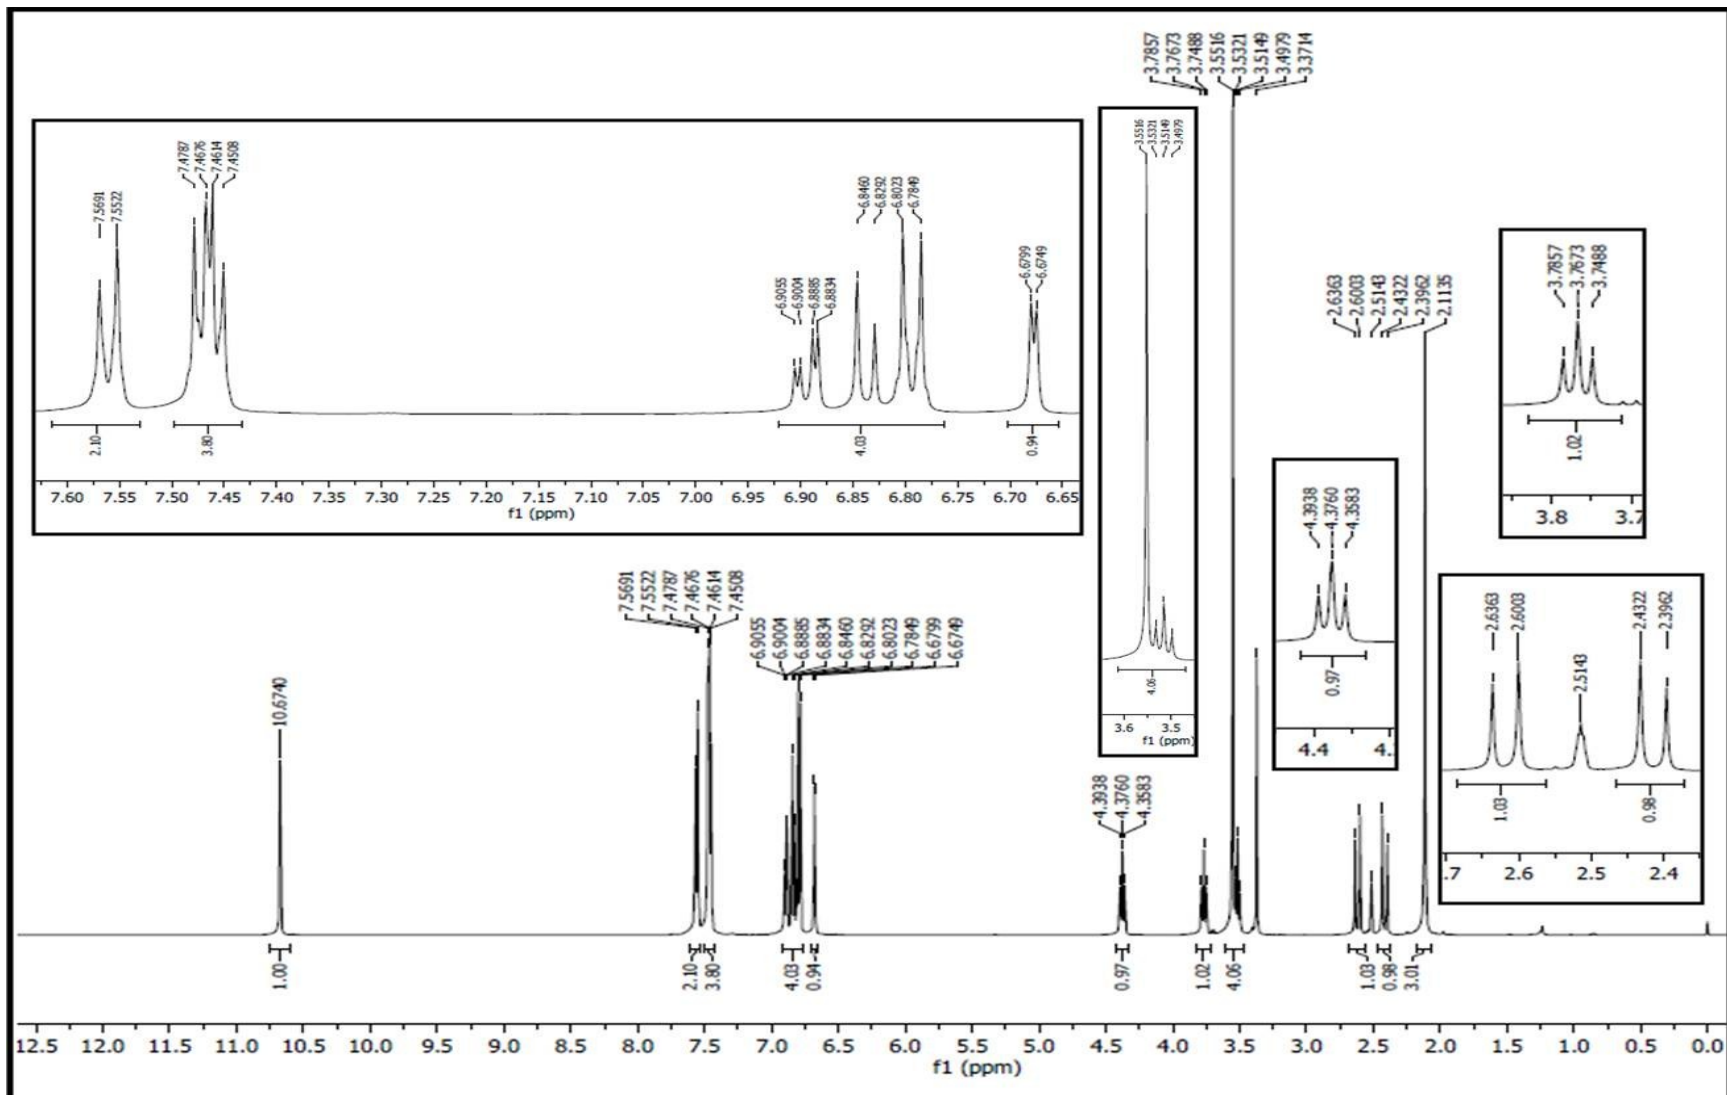

Fig. S37.  $^1\text{H-NMR}$  spectrum of compound **8I** in  $\text{DMSO-}d_6$ .

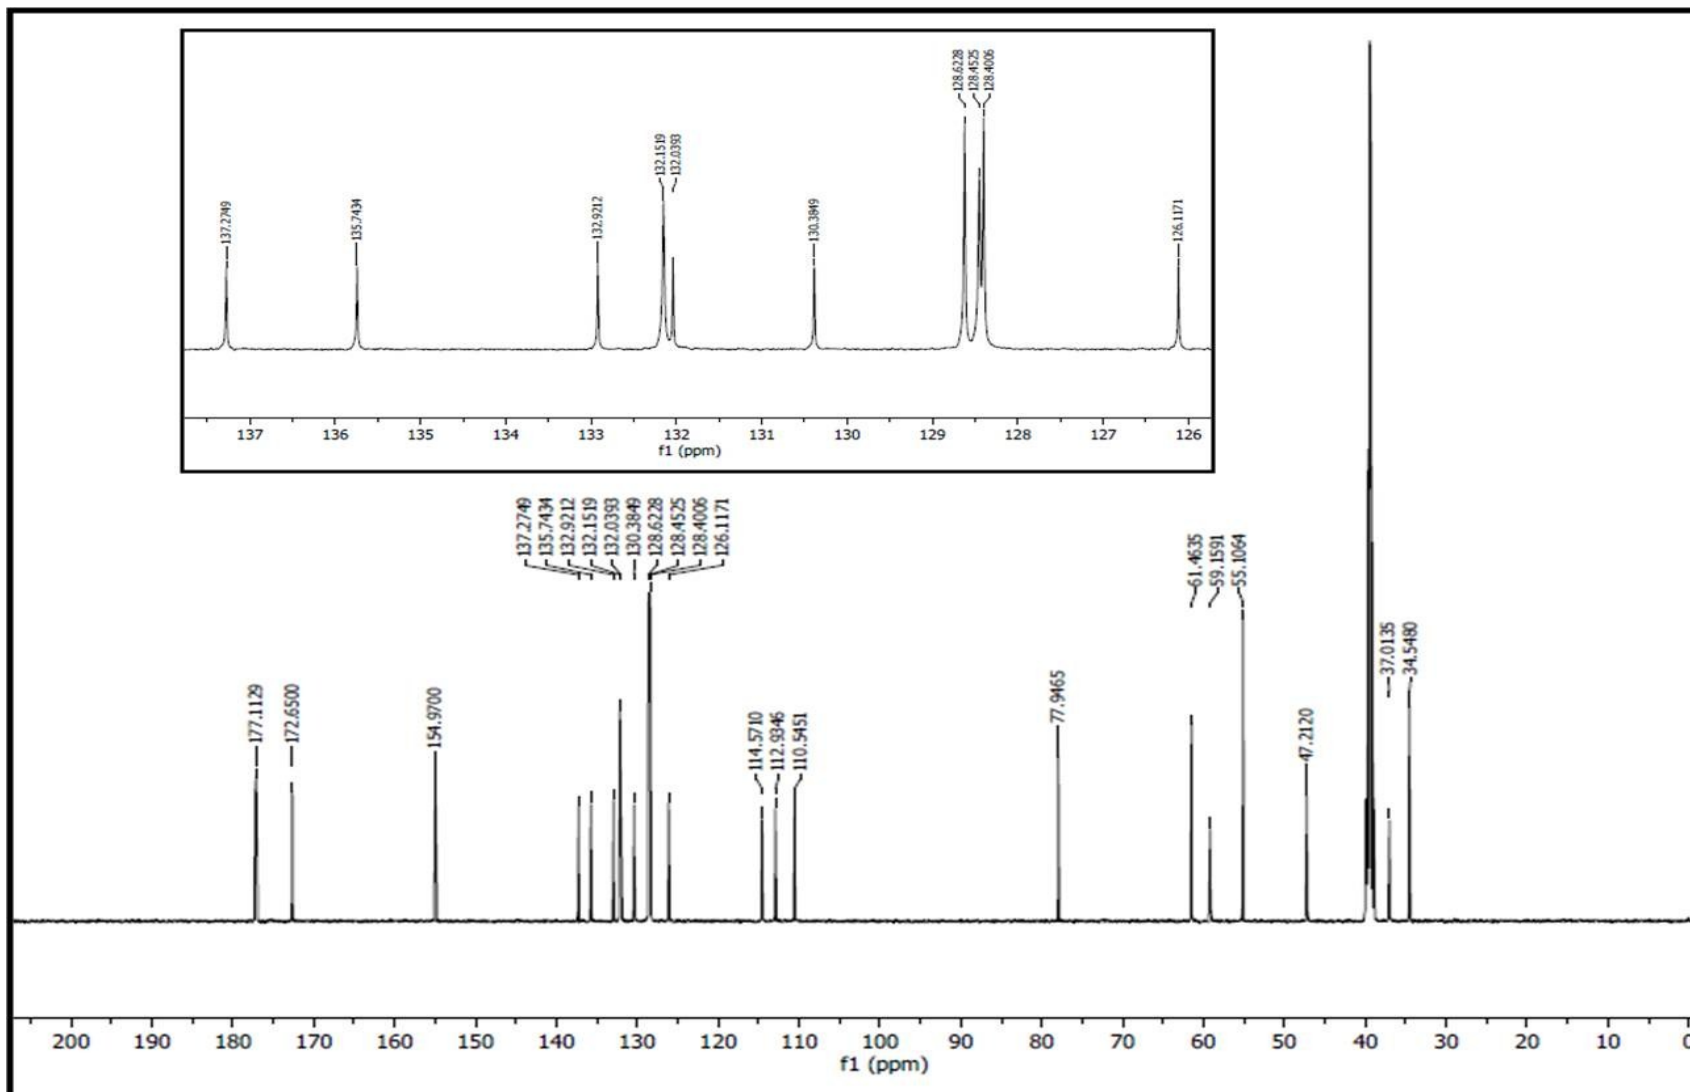

Fig. S38. <sup>13</sup>C-NMR spectrum of compound **8I** in DMSO-*d*<sub>6</sub>.

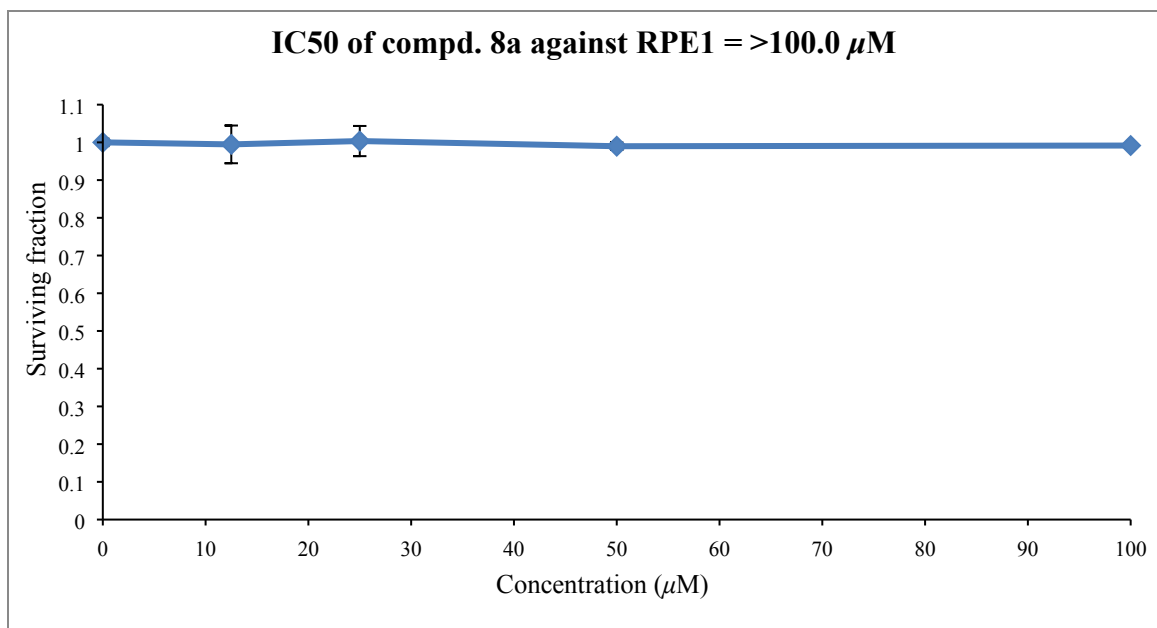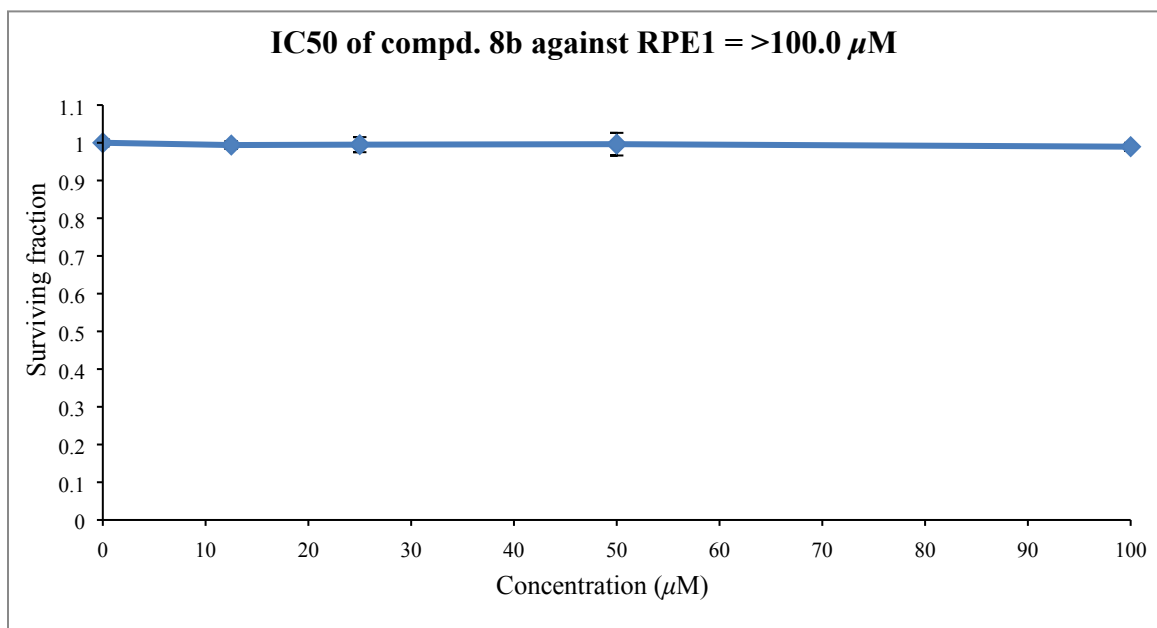

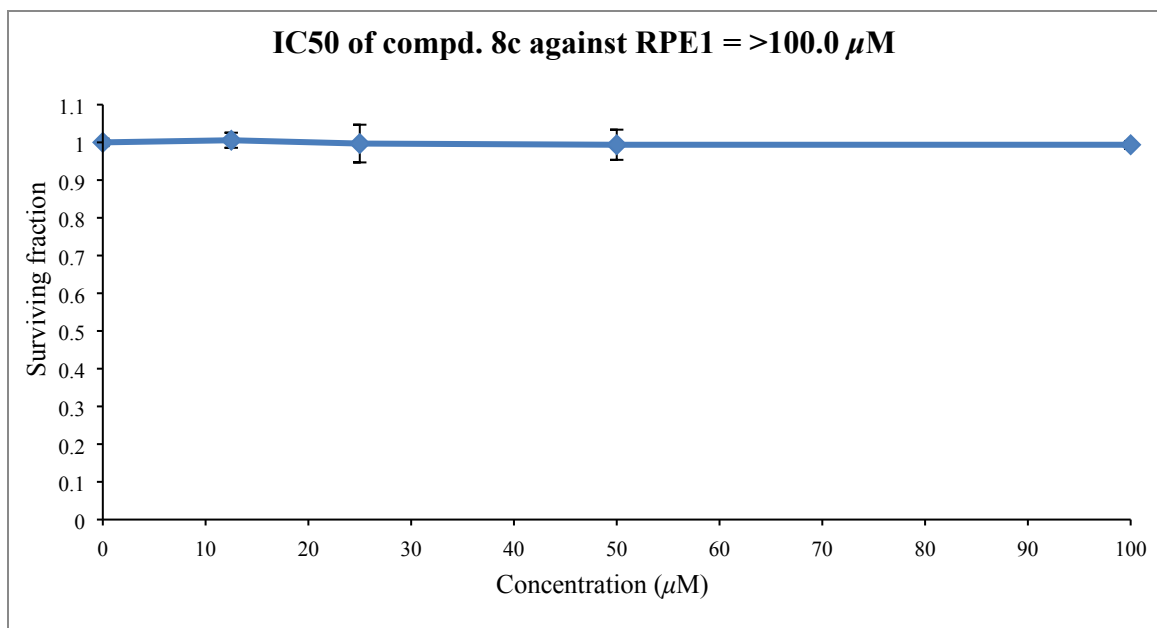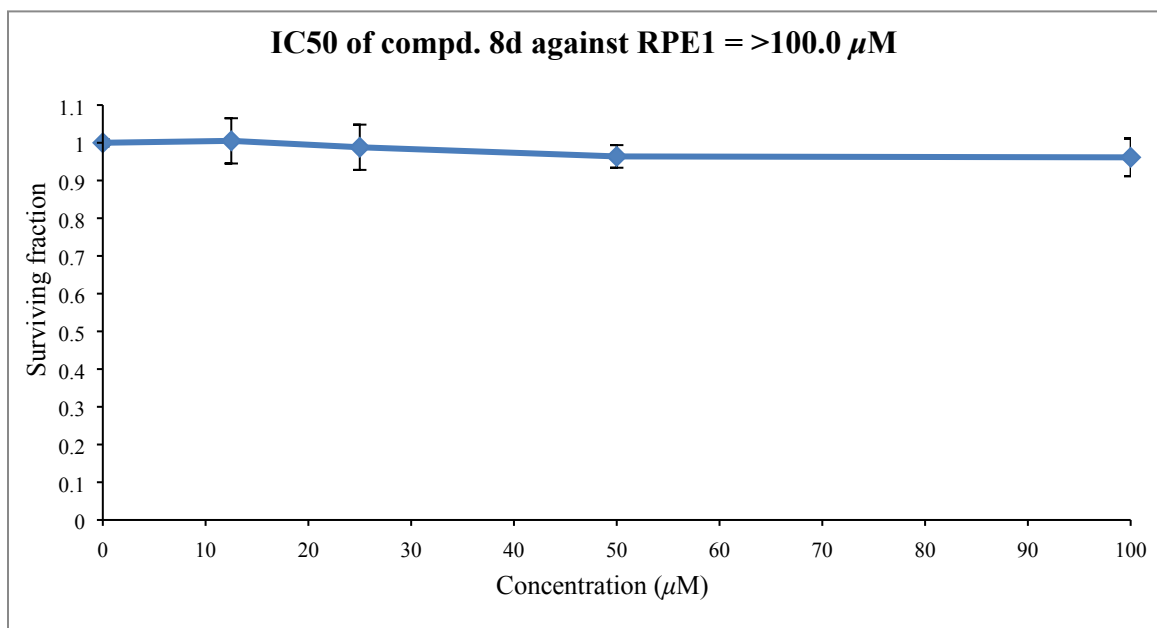

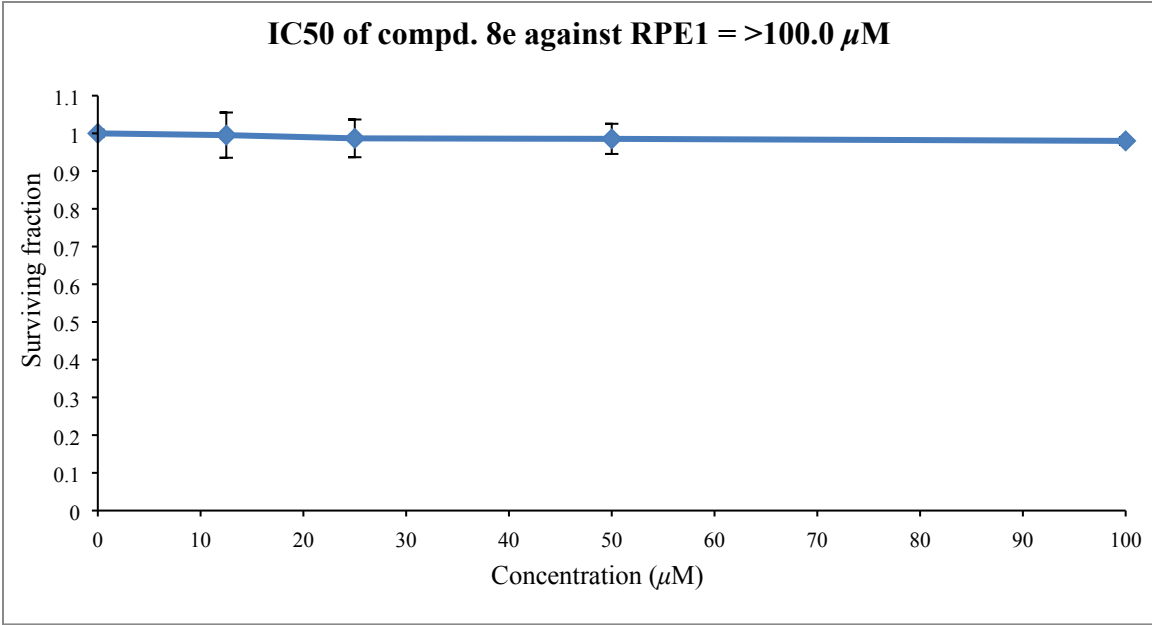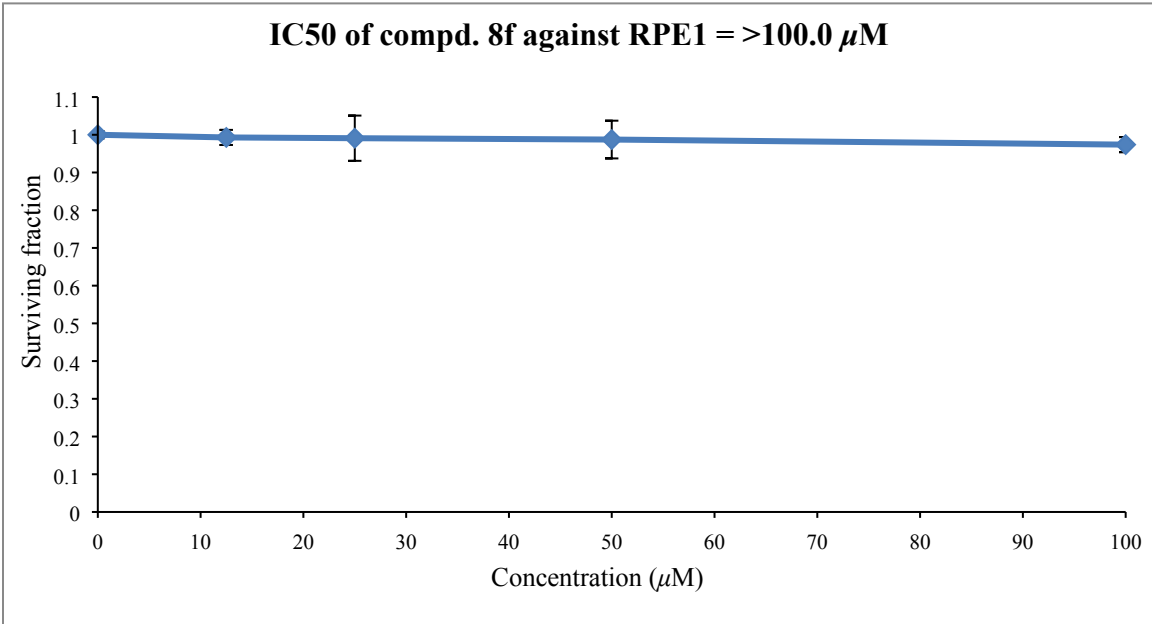

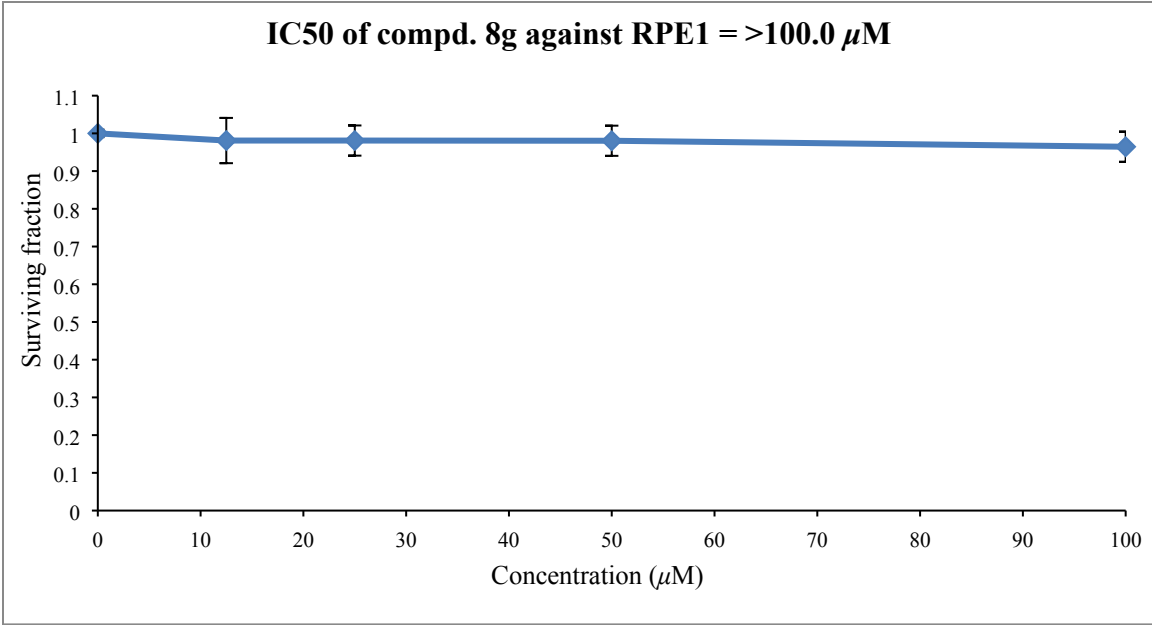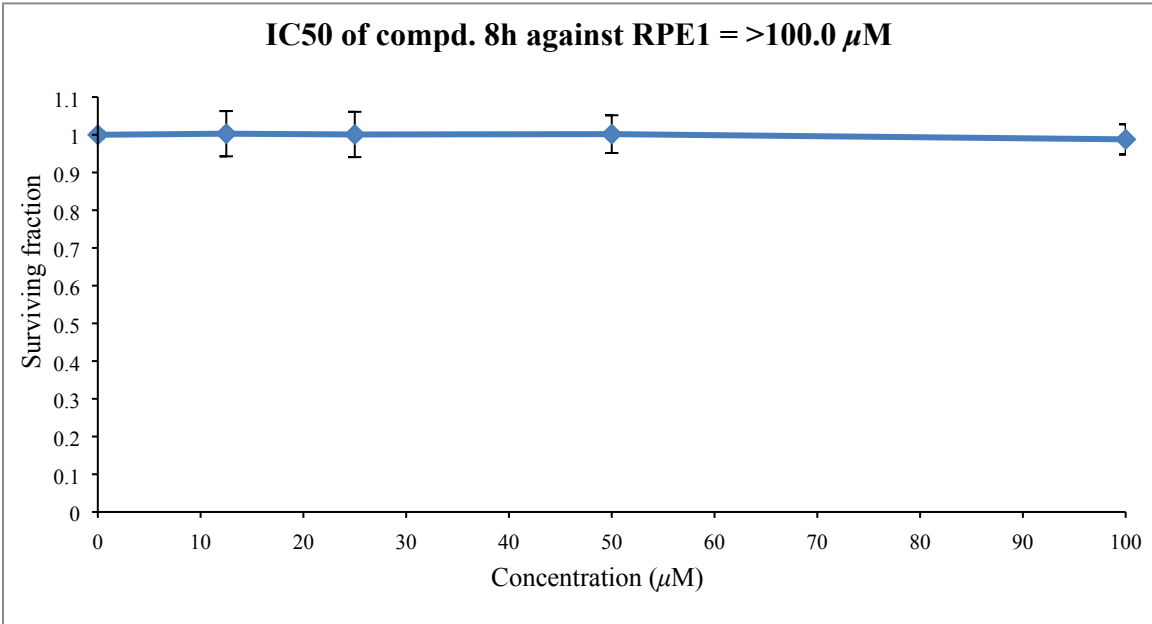

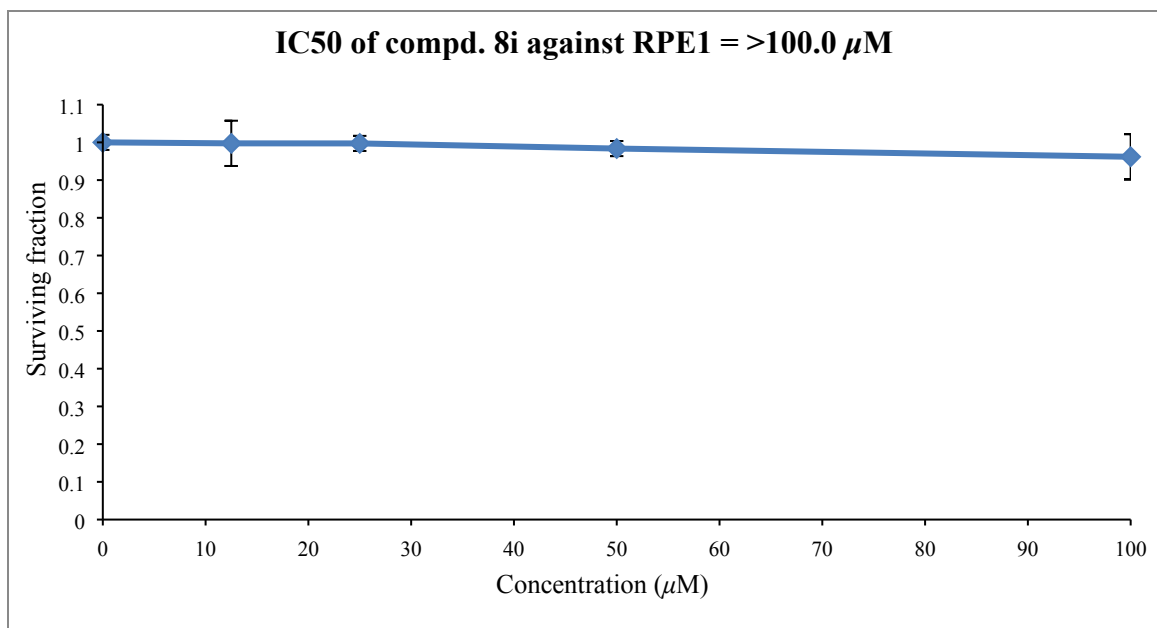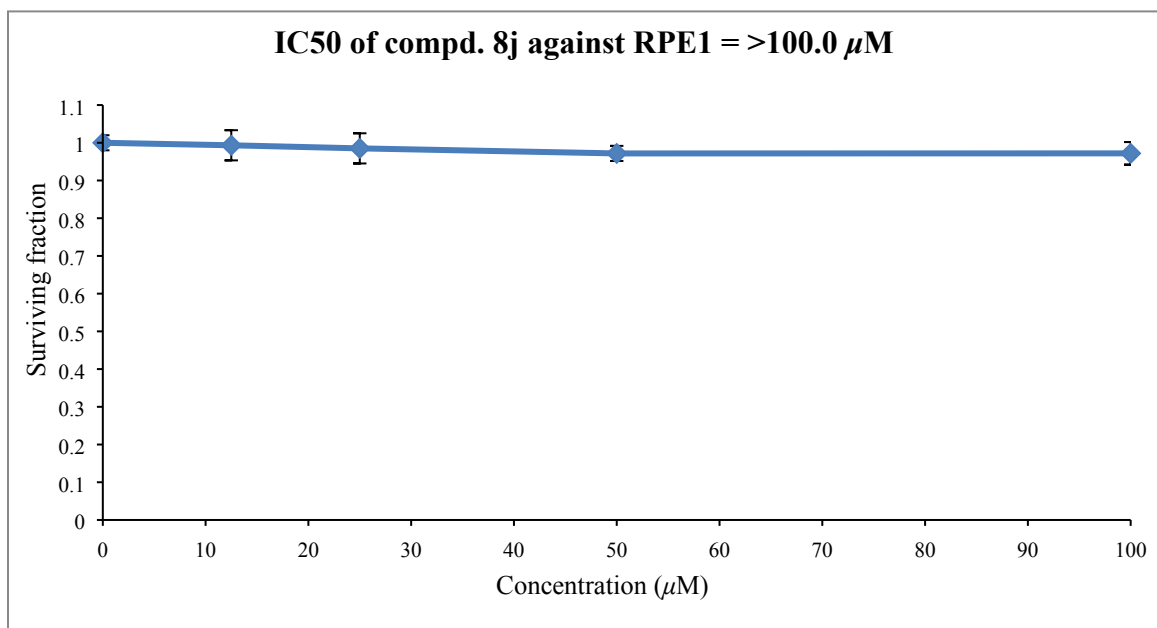



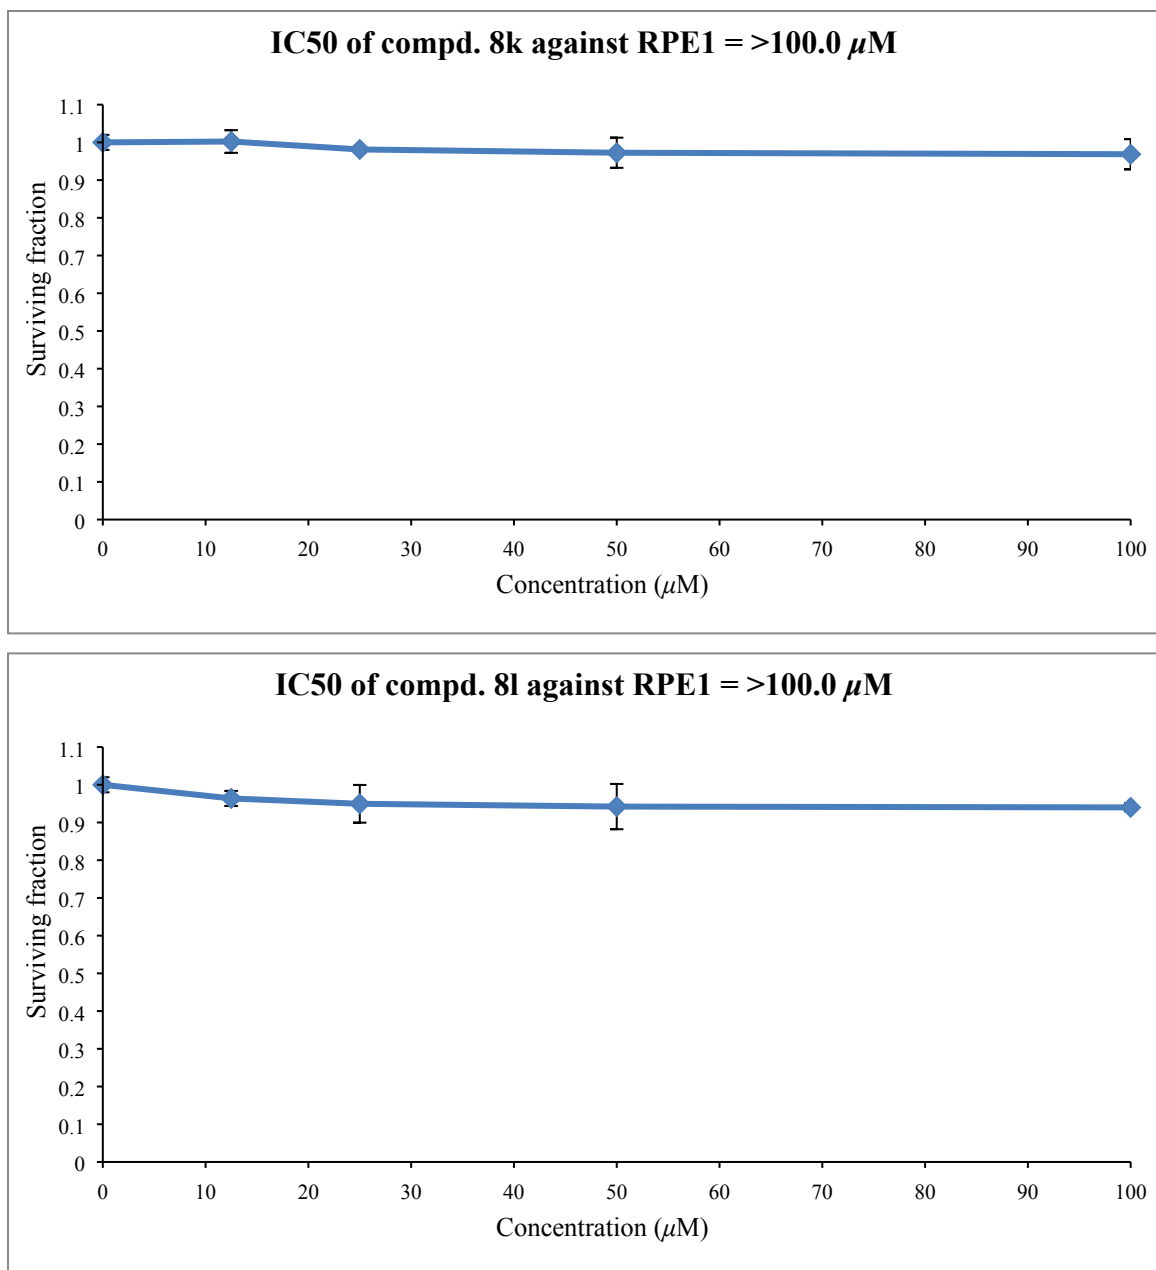

**Fig. S39.** Dose-response curve for the tested compounds against RPE1 (retinal pigment epithelium) cell line.

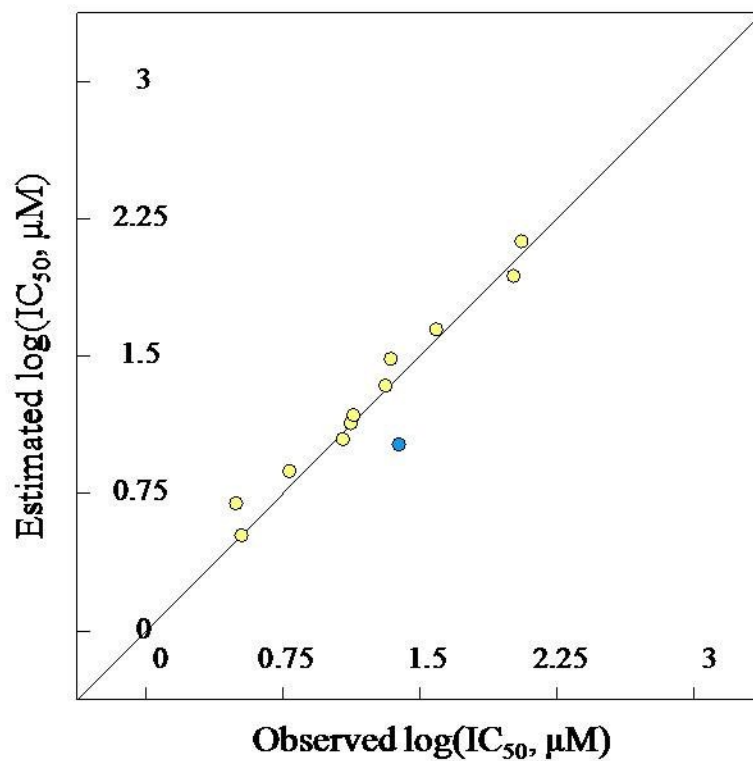

**Fig. S40.** BMLR-QSAR model plot of correlations representing the observed vs. predicted  $\log(\text{IC}_{50}, \mu\text{M})$  values for the tested compounds as AChE inhibitor (compound **8d** is an outlier).

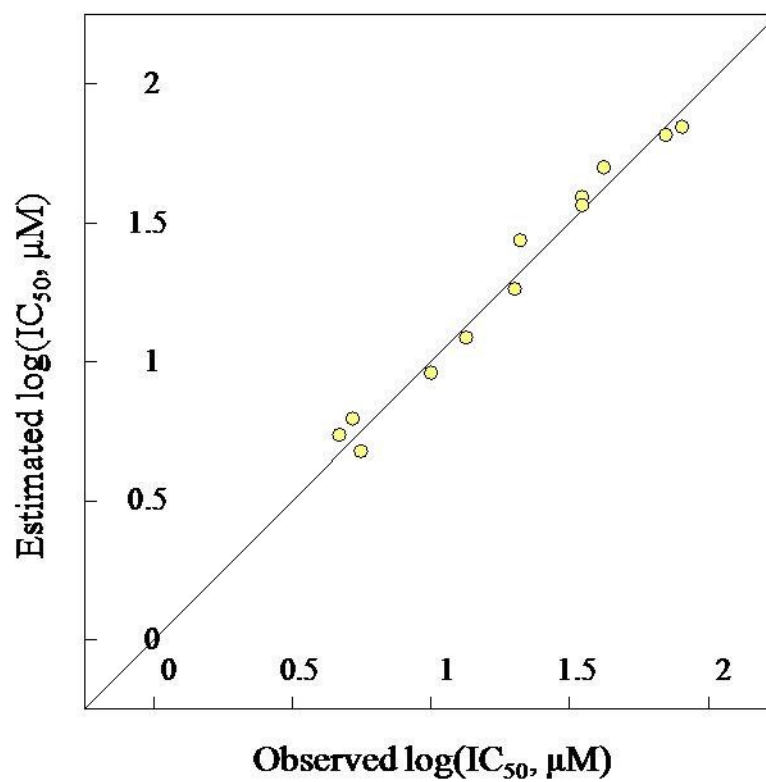

**Fig. S41.** BMLR-QSAR model plot of correlations representing the observed vs. predicted log( $IC_{50}$ ,  $\mu M$ ) values for the tested compounds as BChE inhibitor.

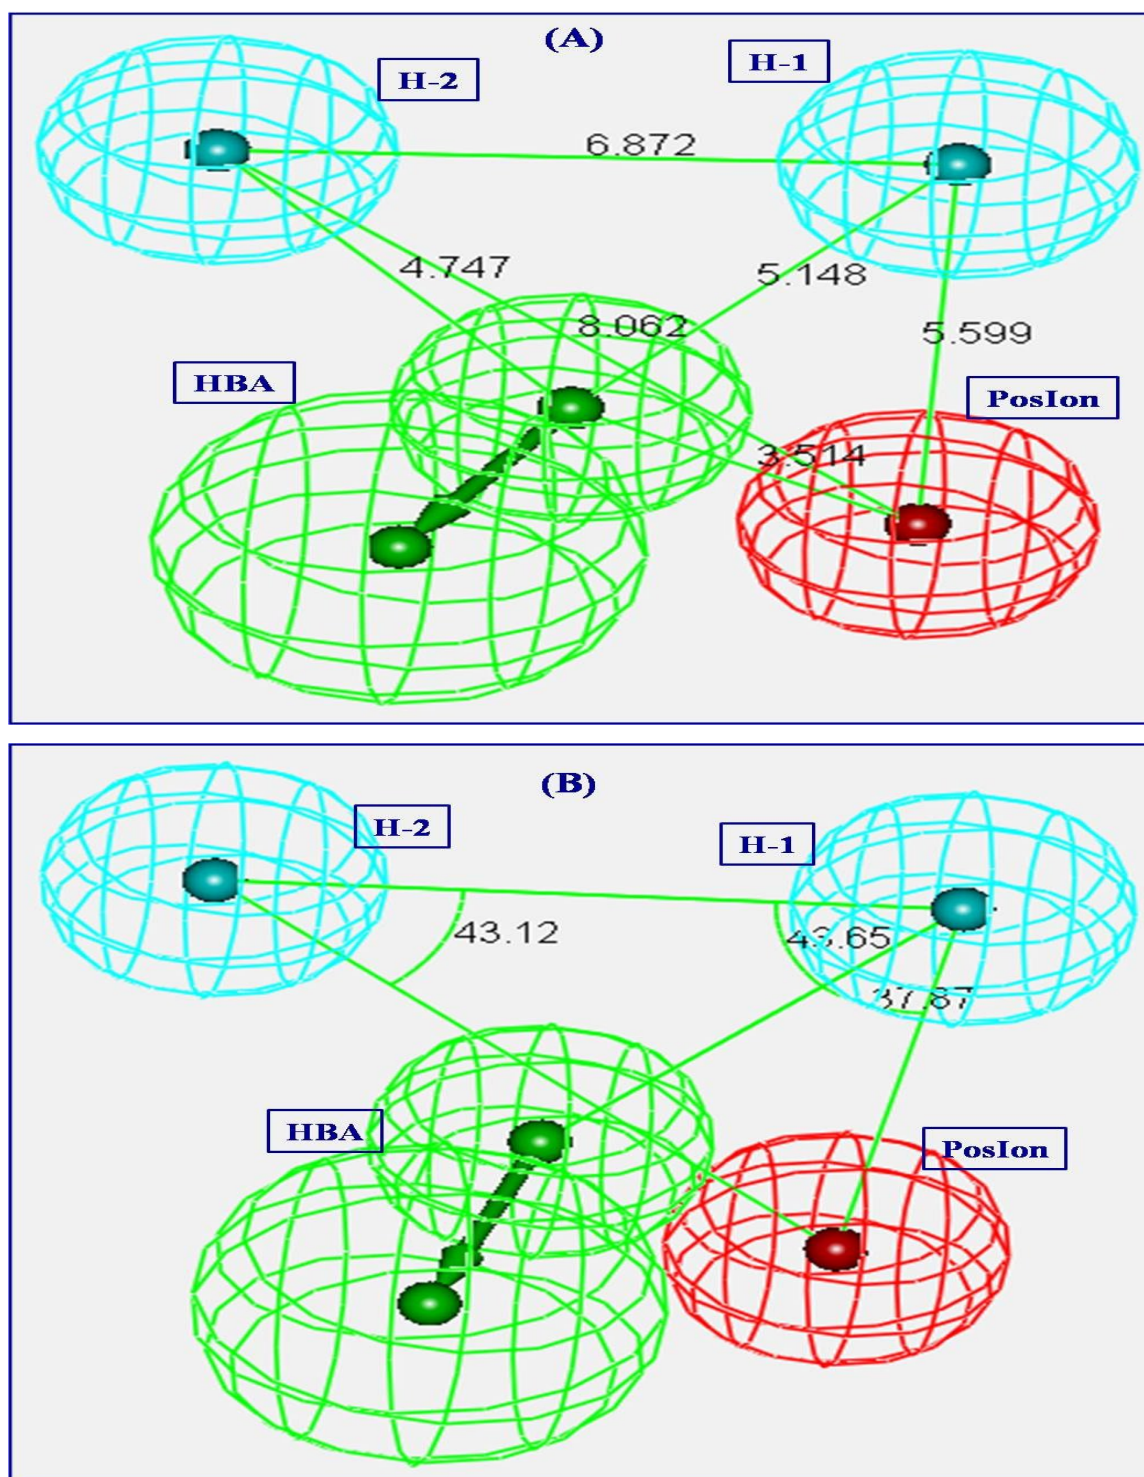

**Fig. S42.** (A) Constraint distances “H-1 – H-2 = 6.872, H-1 – PosIon = 5.599, H-1 – HBA = 5.148, H-2 – HBA = 4.747, H-2 – PosIon = 8.062, HBA – PosIon = 3.514 Å”; (B) Constraint angles “H-1 – H-2 – PosIon = 43.12, H-2 – H-1 – HBA = 43.65, HBA – H-1 – PosIon = 37.87 °” of the generated 3D-pharmacophore for the tested compounds **8a–l** as AChE inhibitor which contains two hydrophobics (H-1, H-2; light blue), one hydrogen bonding acceptor (HBA; green) and one positive ionizable (PosIon; red).

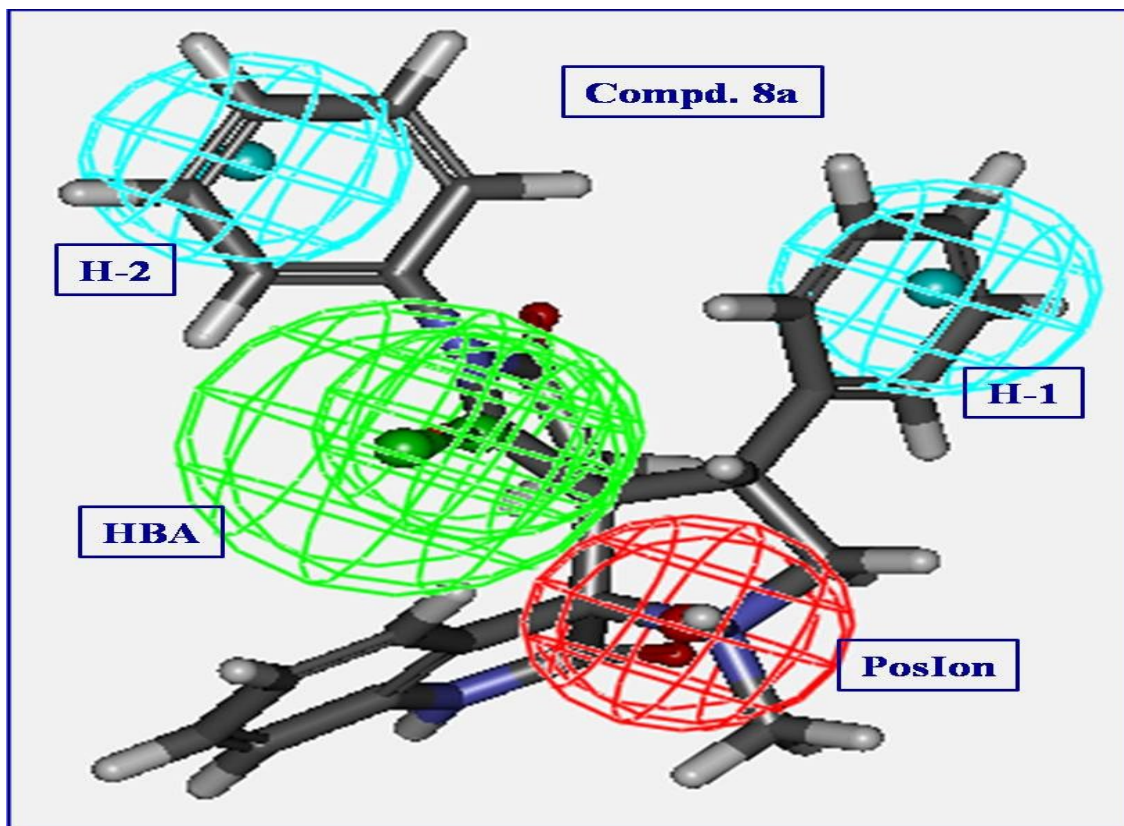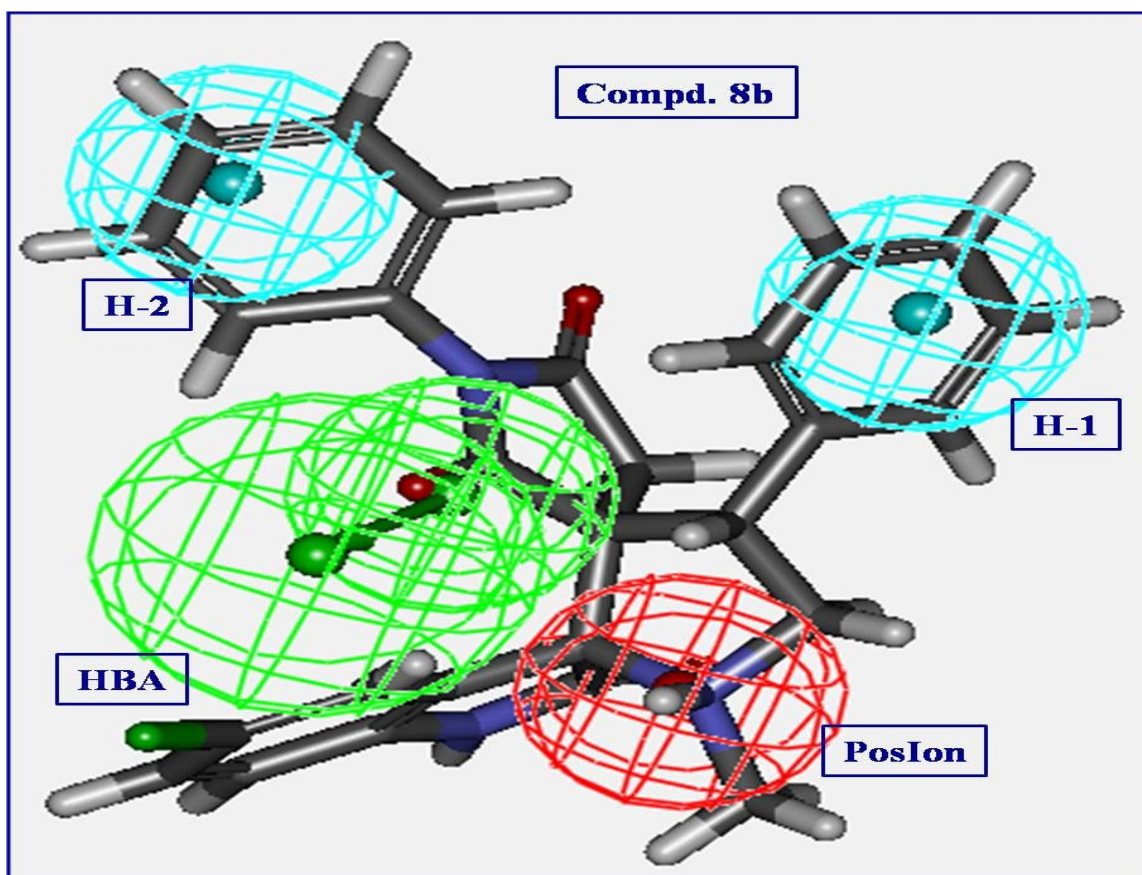



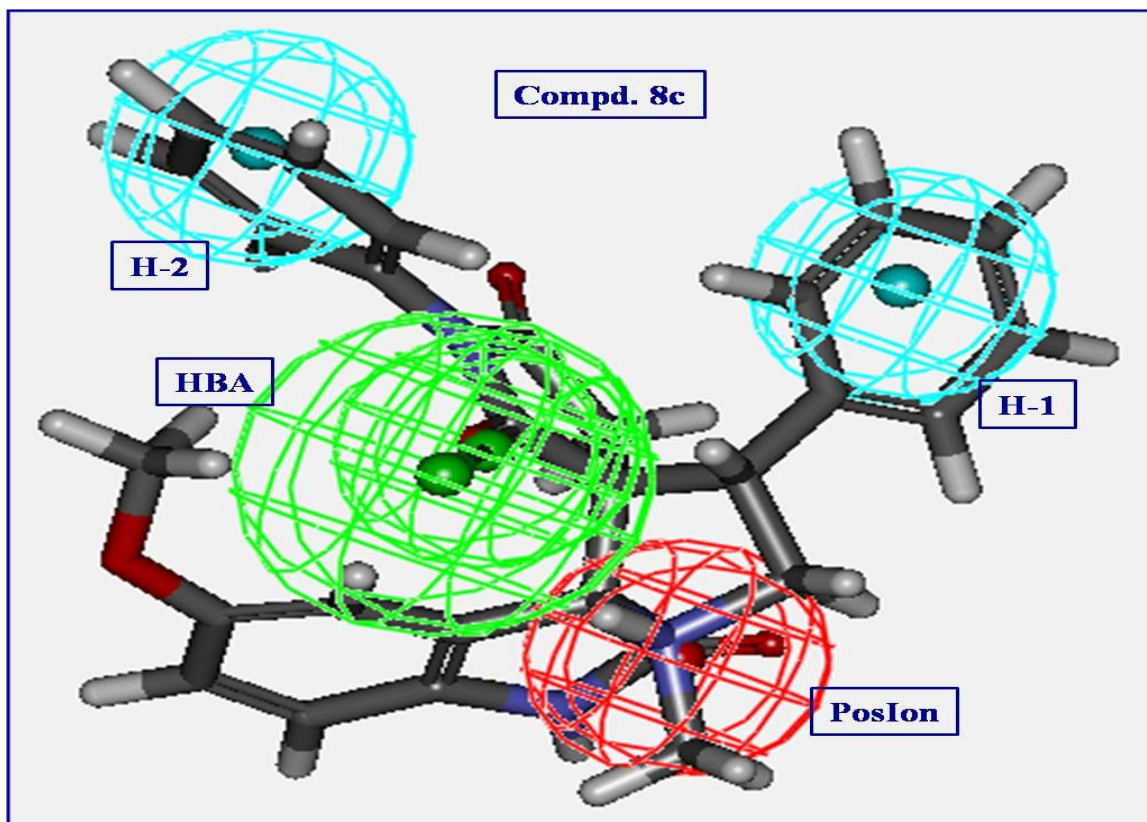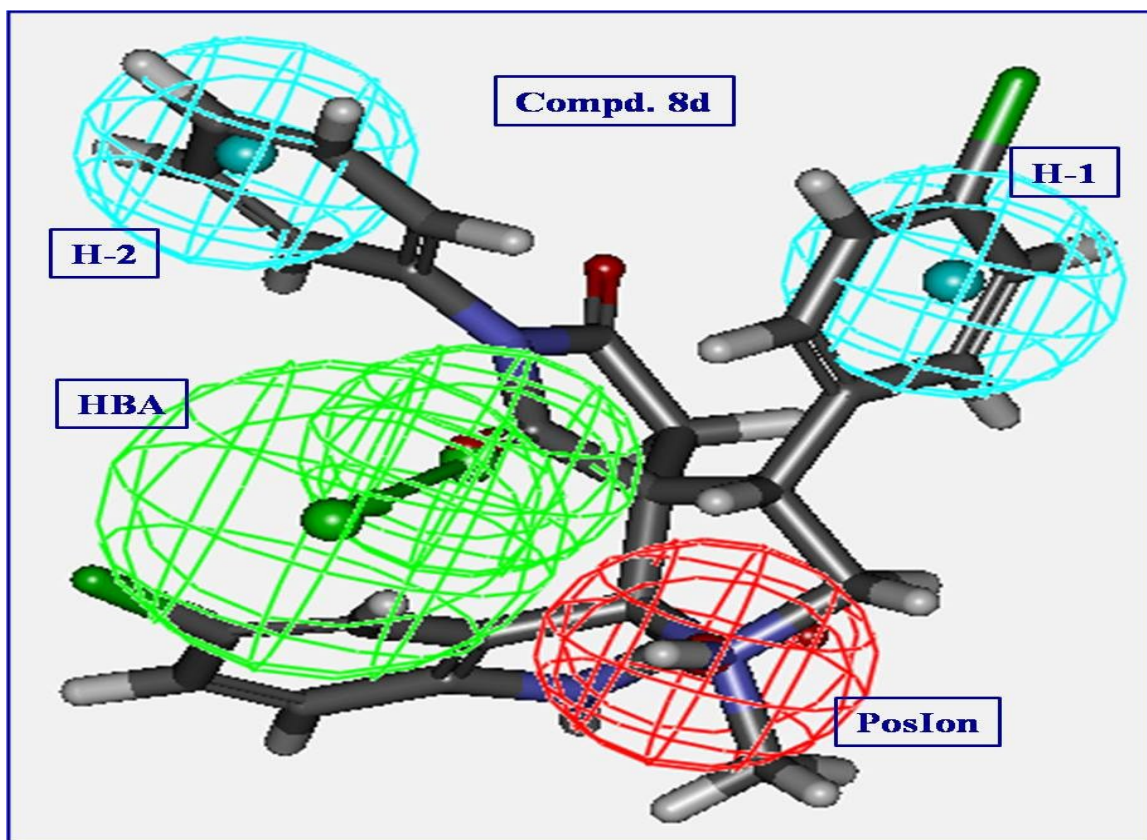

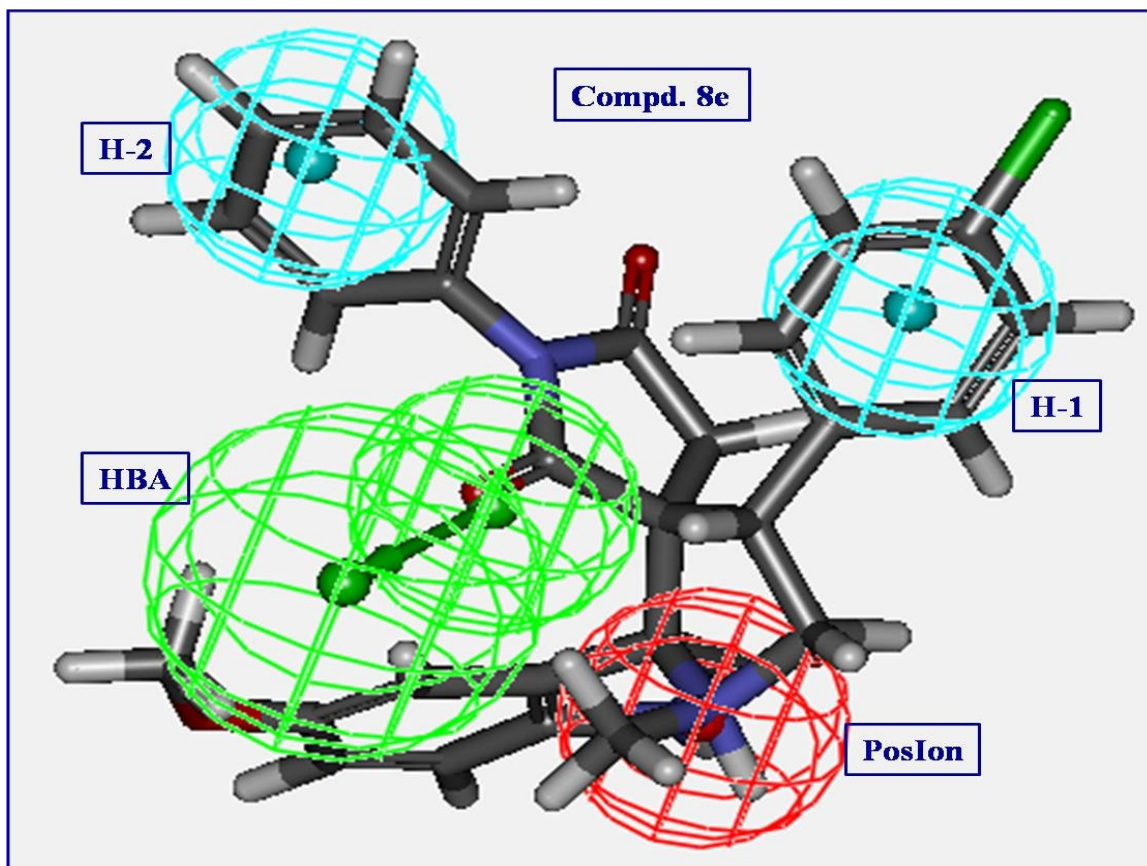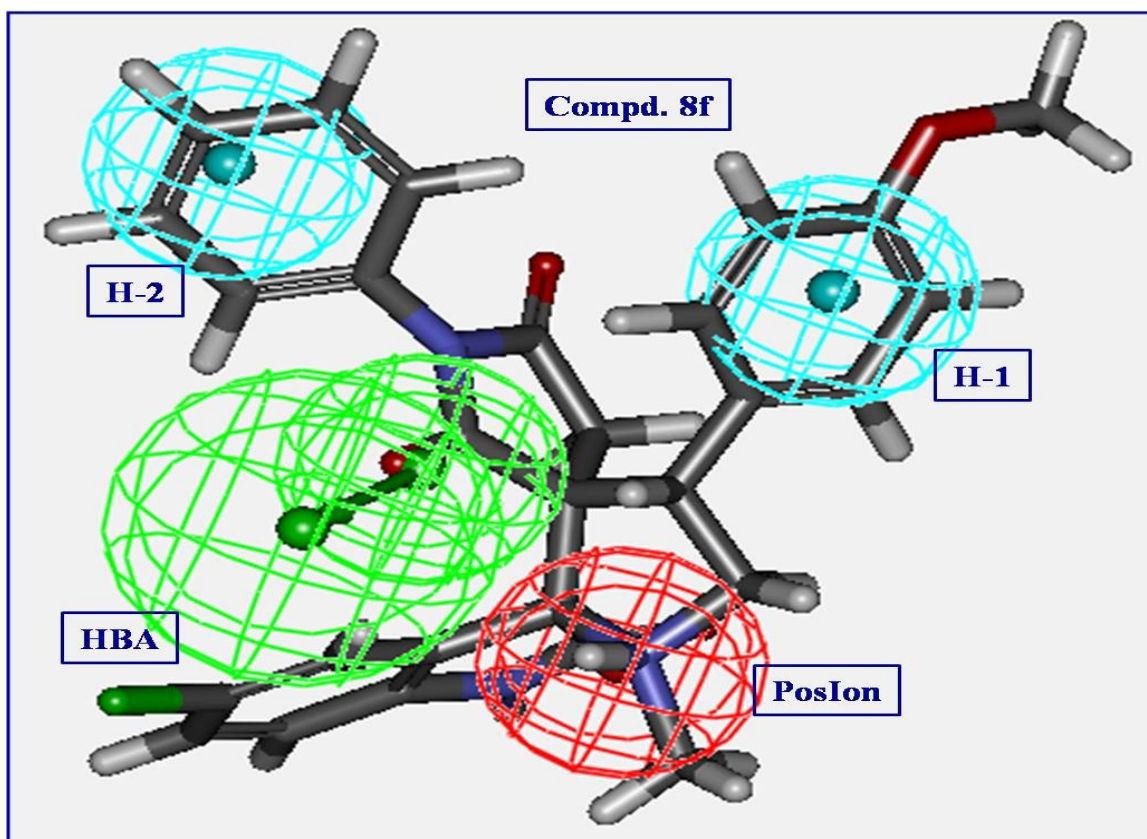



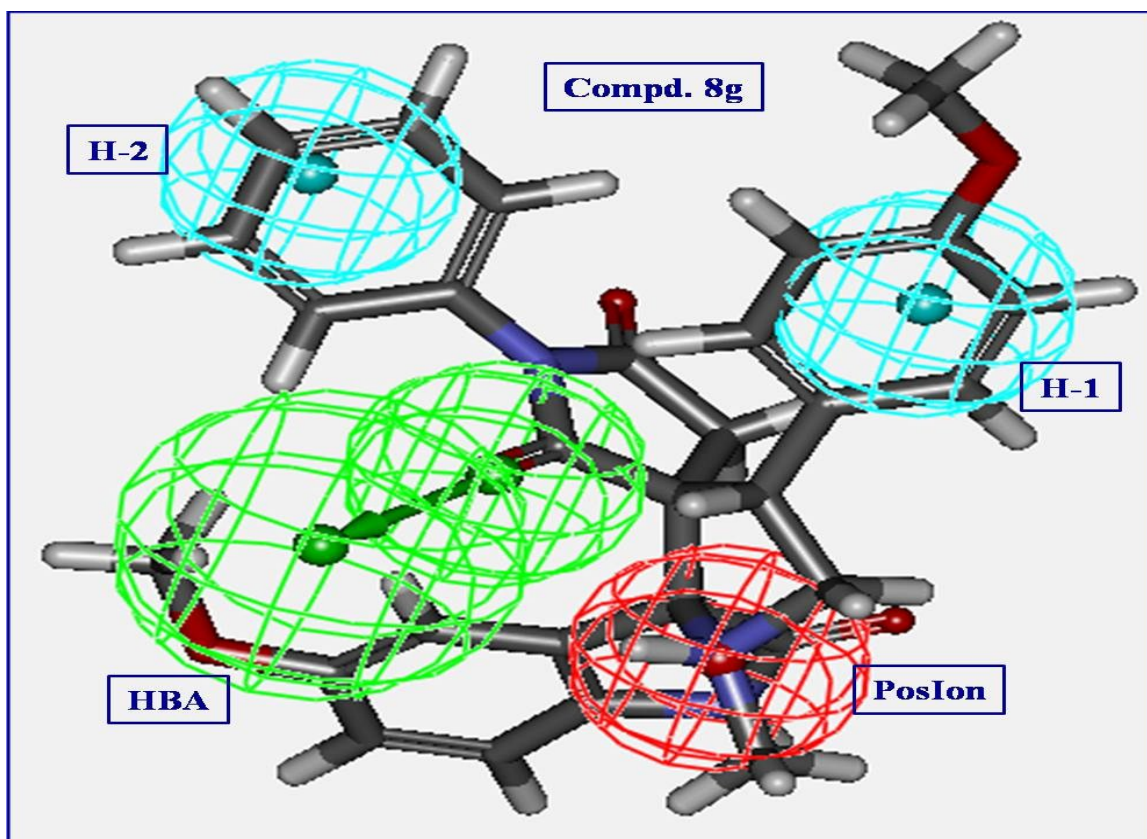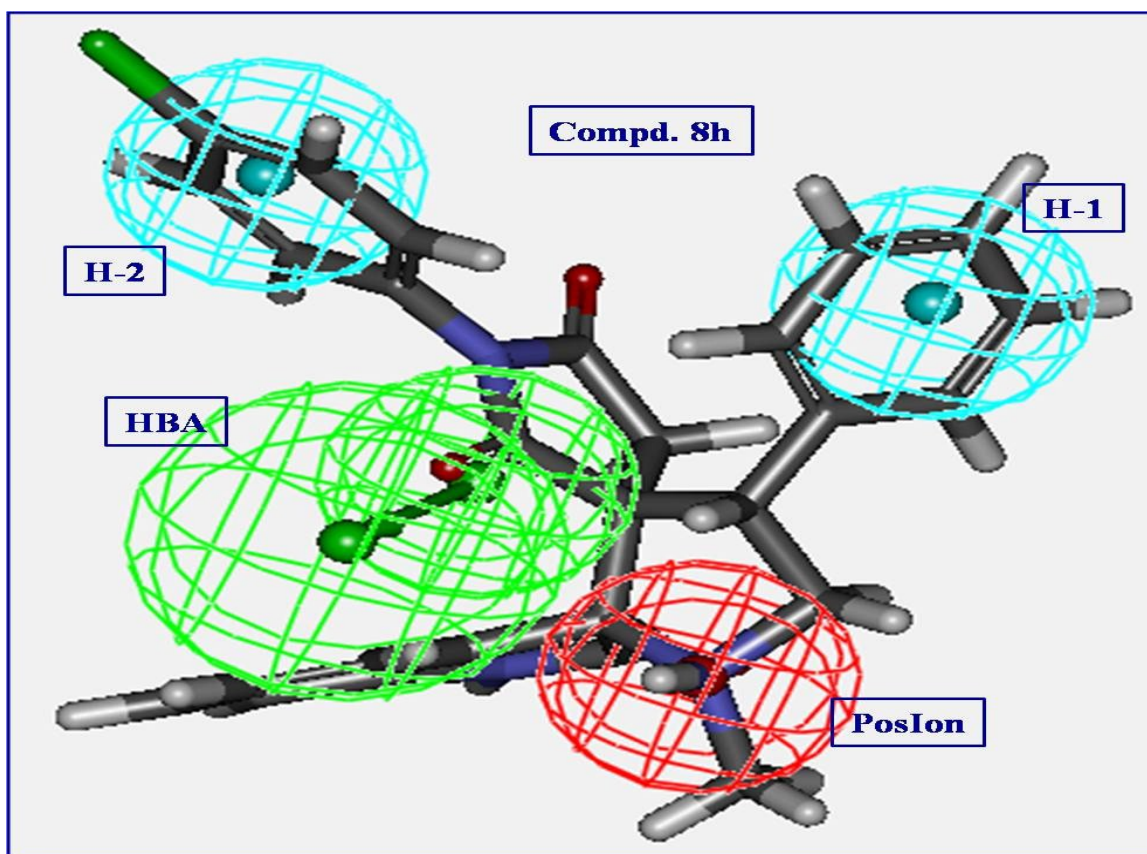



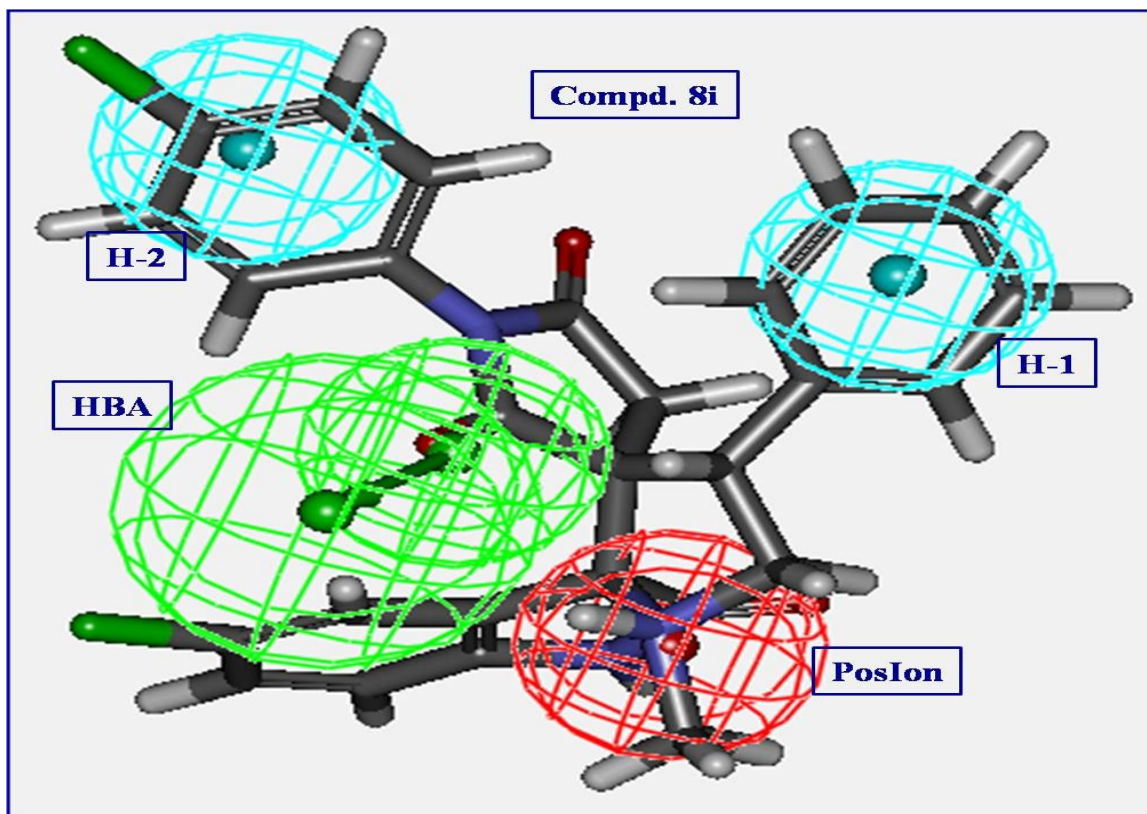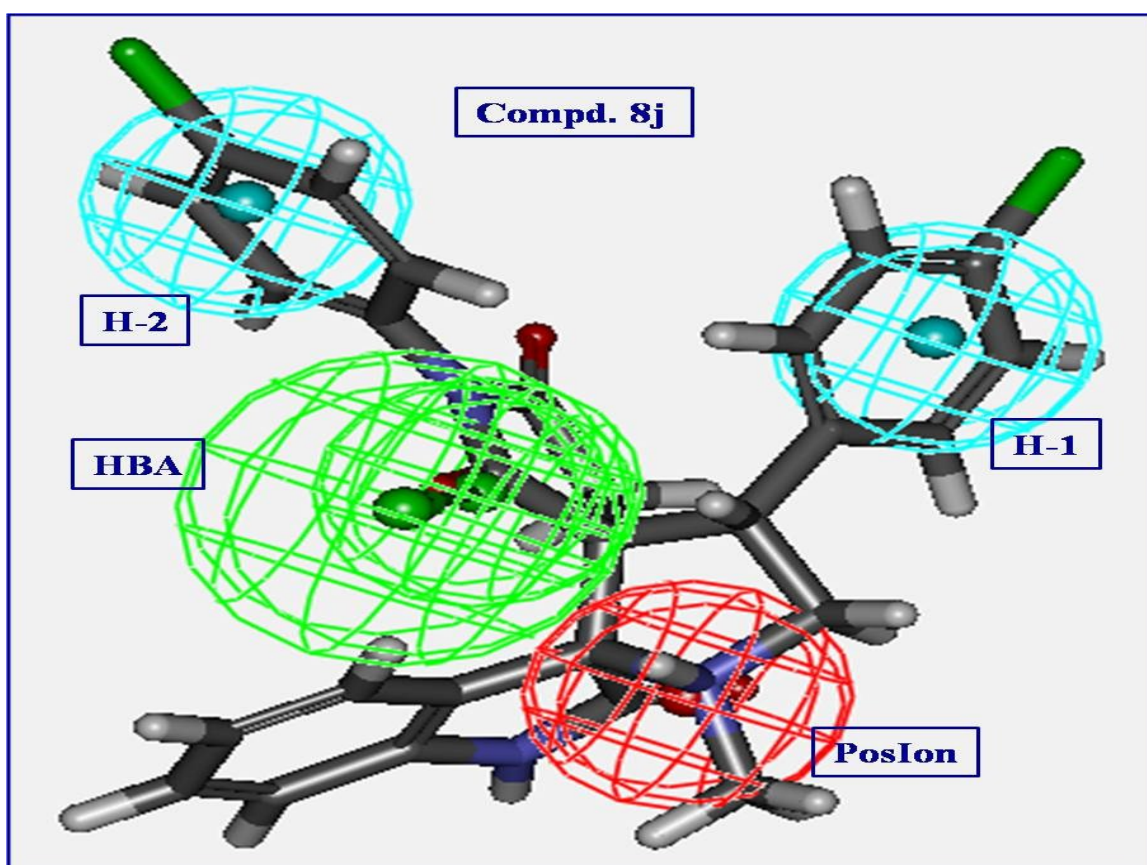

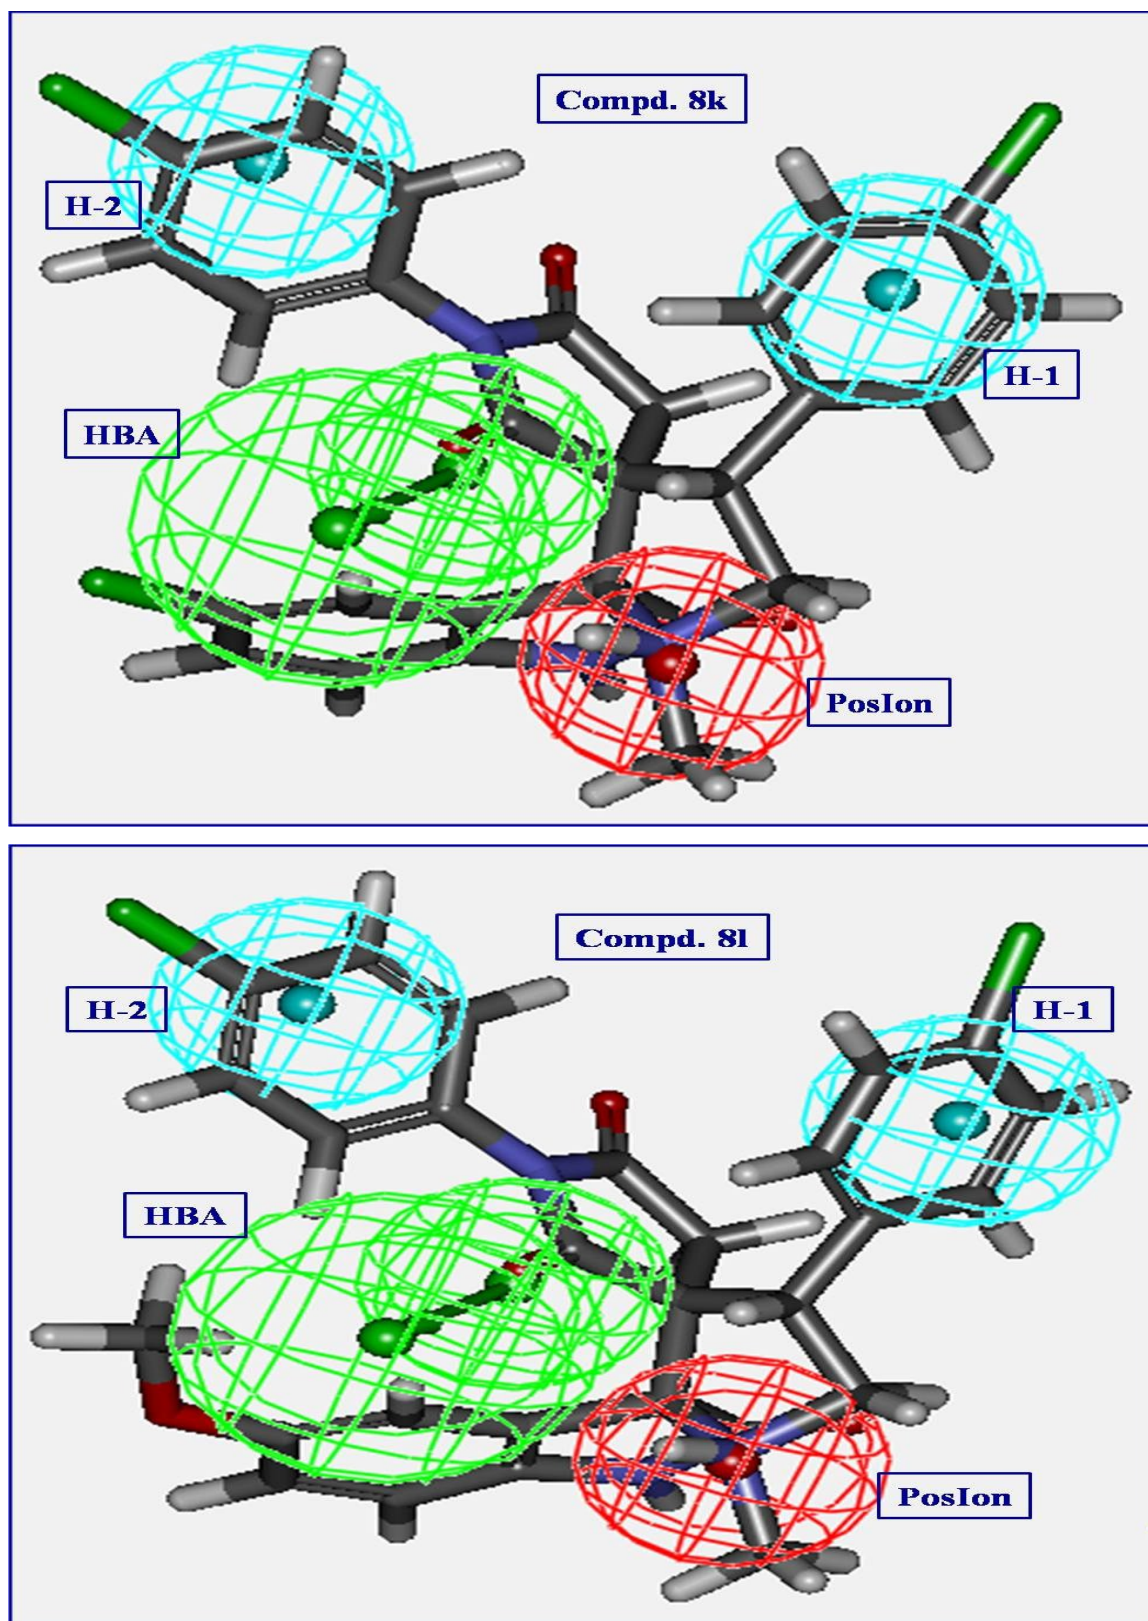

Fig. S43. 3D-pharmacophore model mapped on the tested compounds **8a-l** as AChE inhibitor.



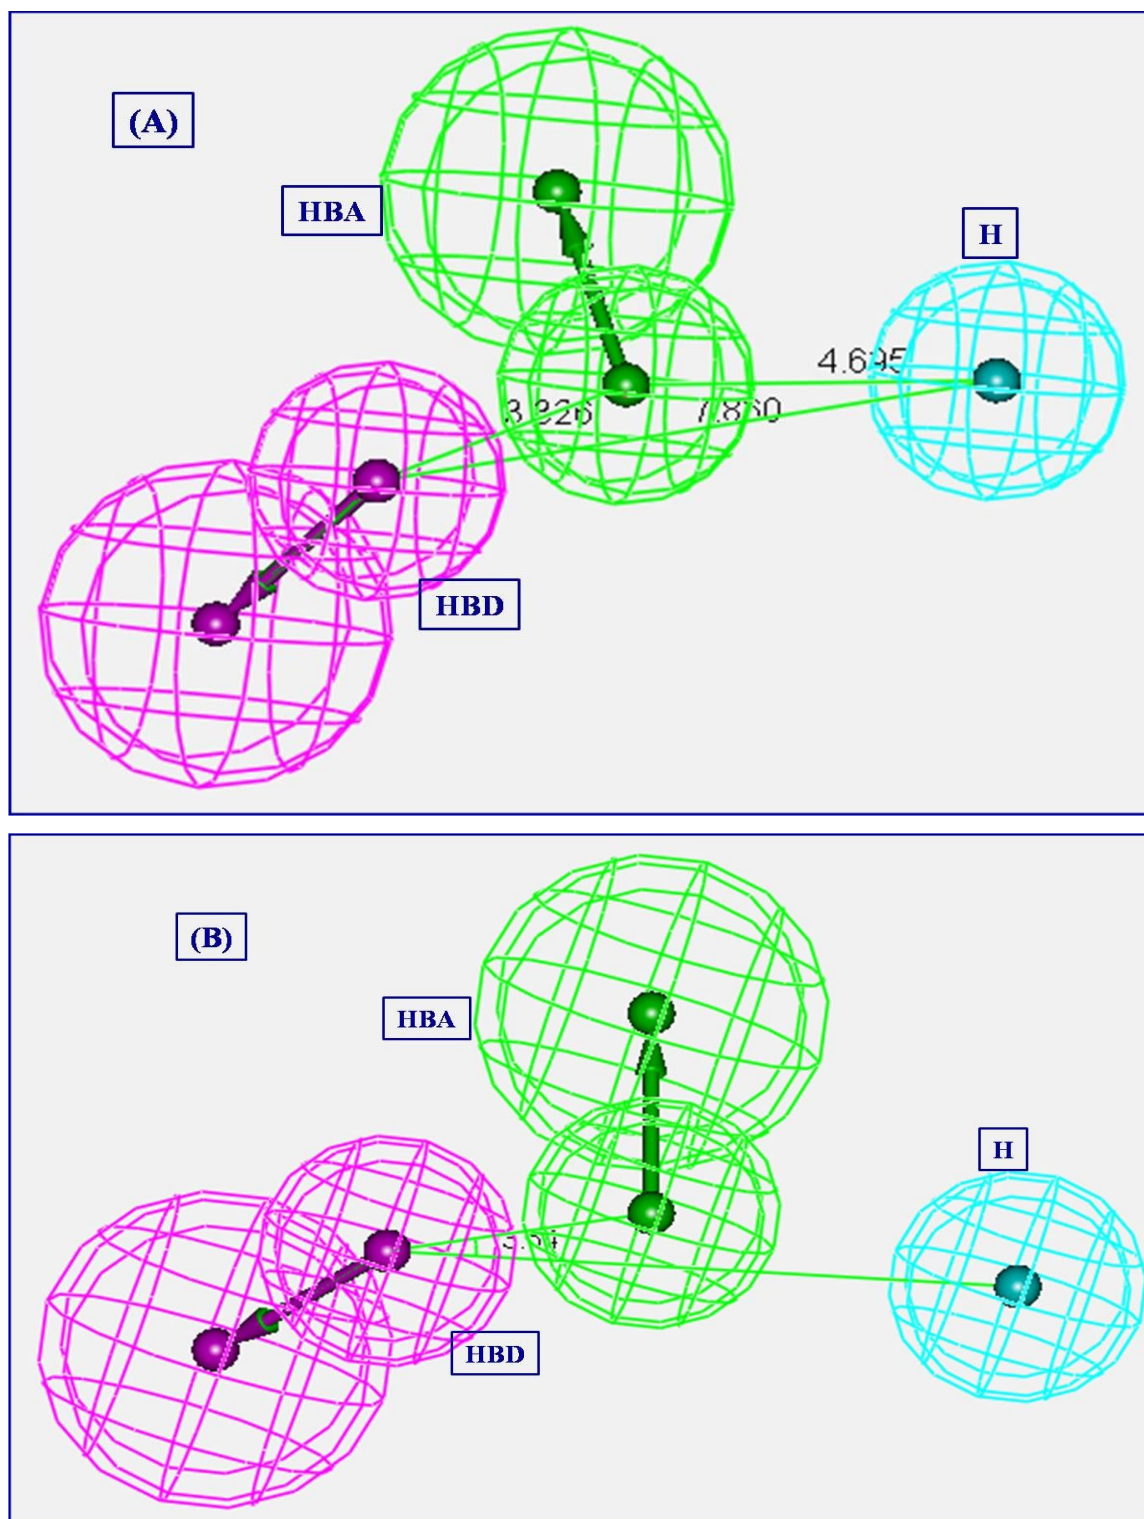

**Fig. S44.** (A) Constraint distances “H – HBA = 4.695, H – HBD = 7.860, HBA – HBD = 3.326 Å”; (B) Constraint angle “H – HBD – HBA = 13.64 °” of the generated 3D-pharmacophore for the tested compounds **8a–l** as BChE inhibitor which contains one hydrophobic (H; light blue), one hydrogen bonding acceptor (HBA; green) and one hydrogen bonding donor (HBD; purple).

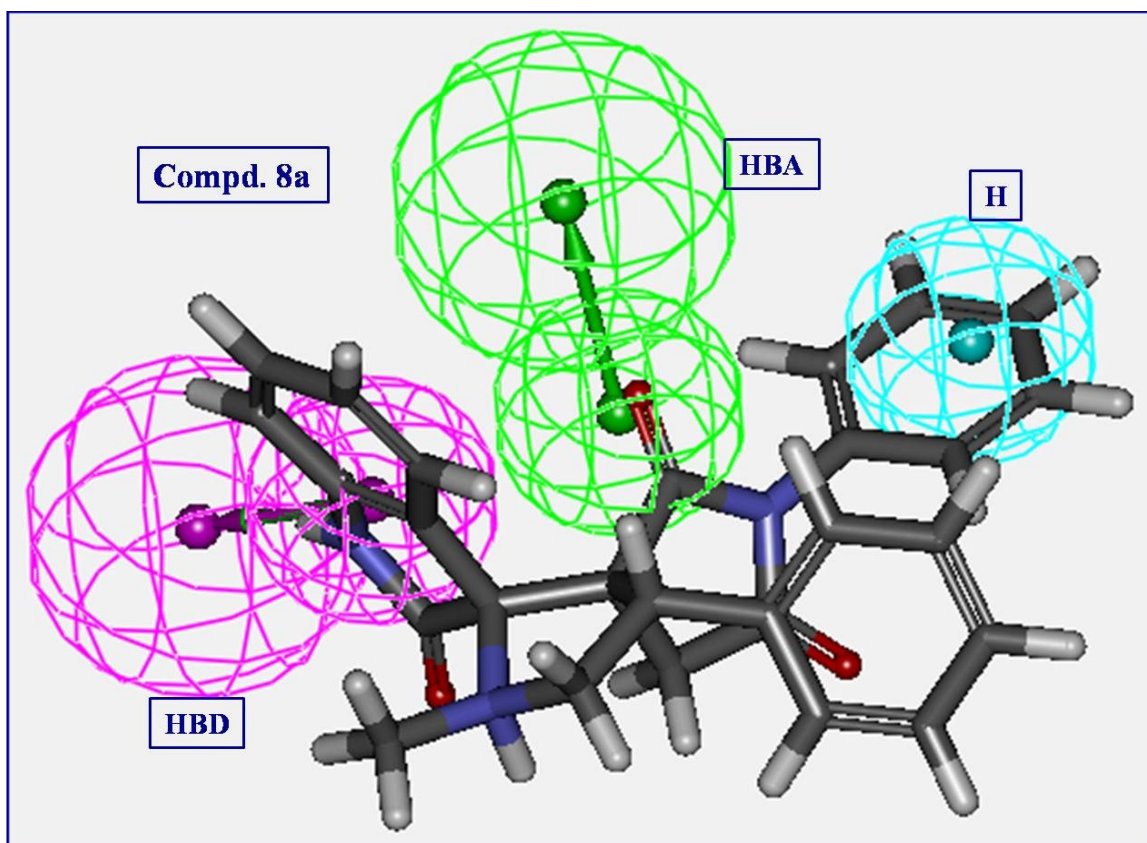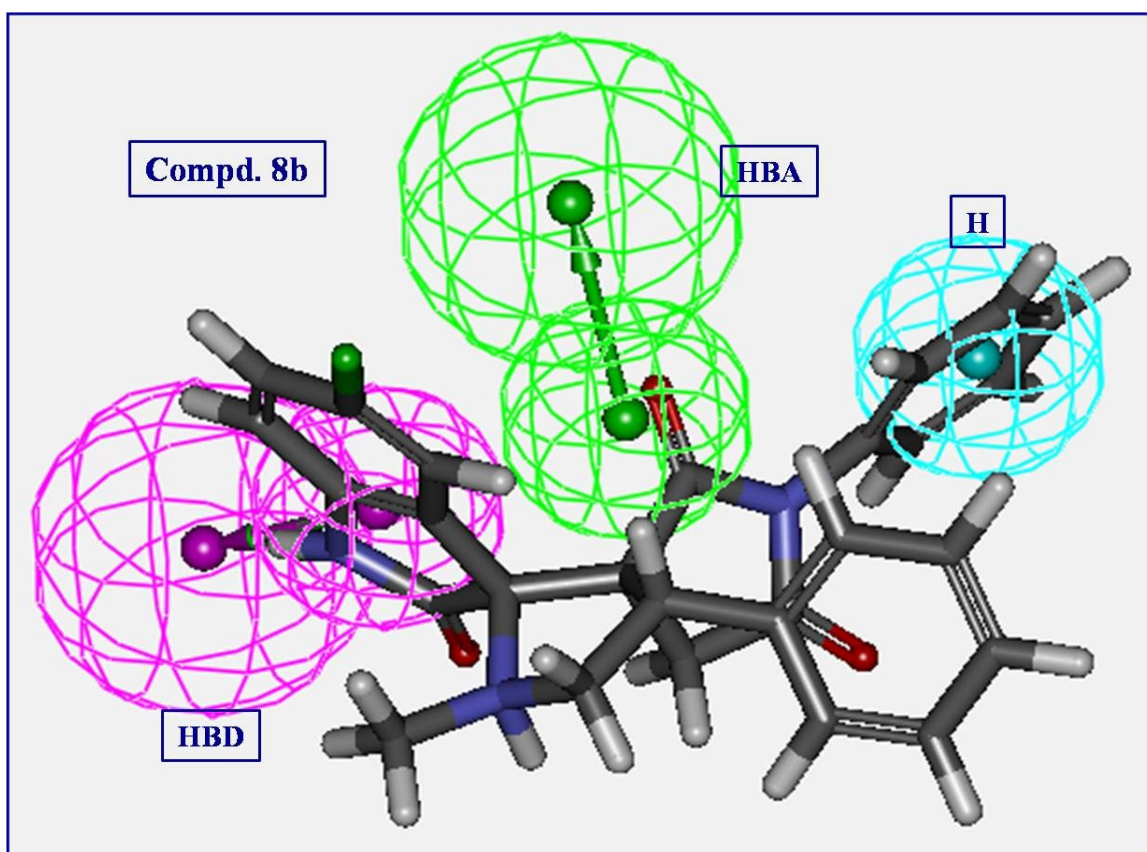



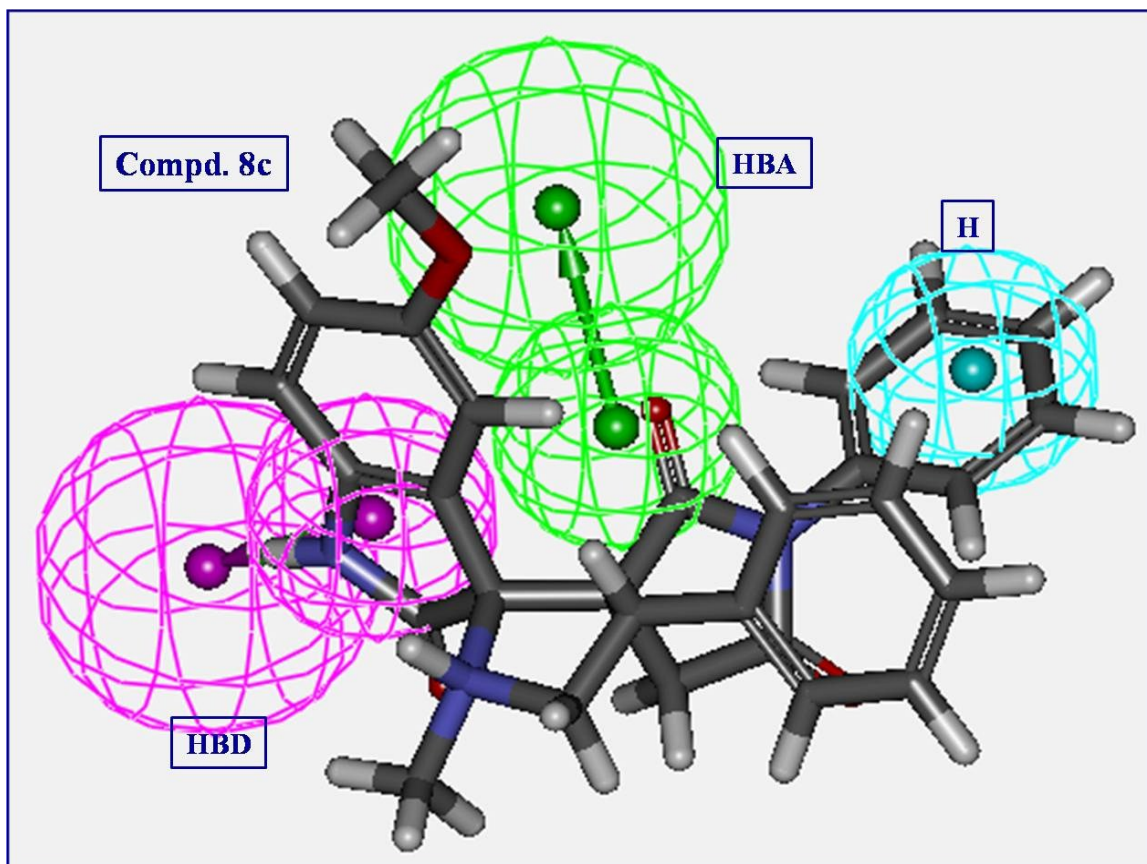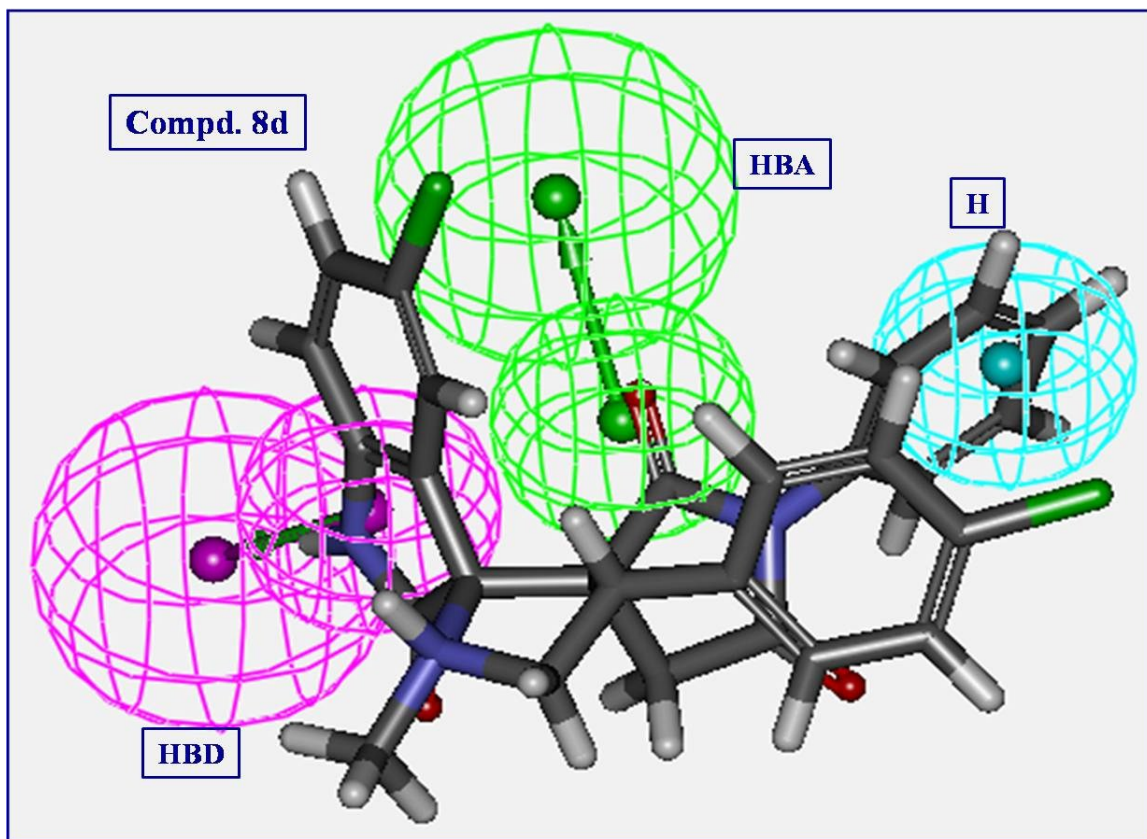

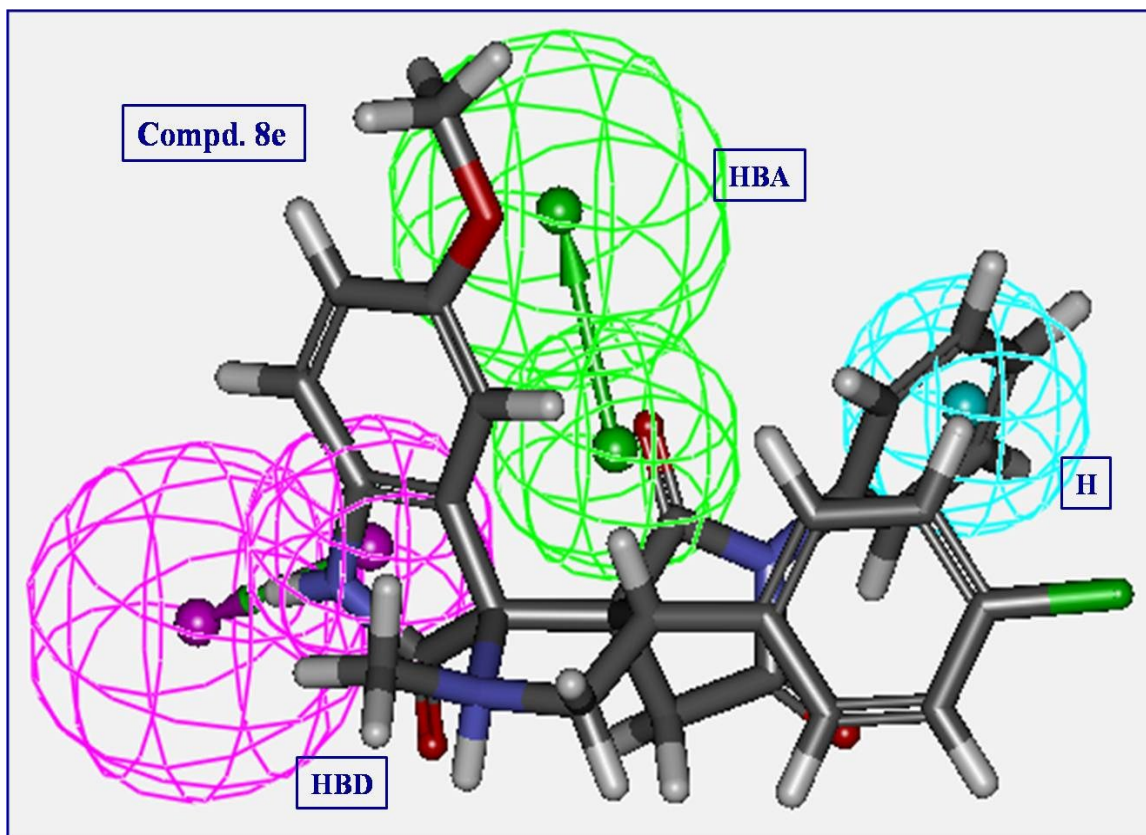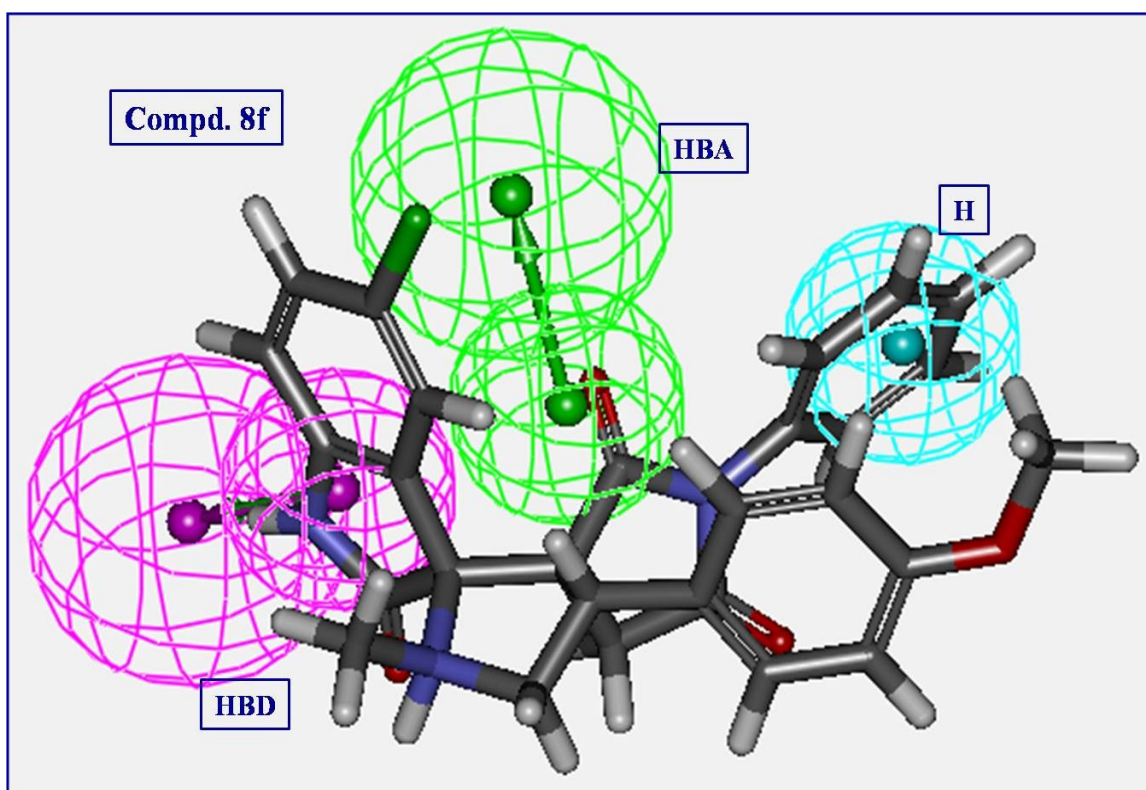



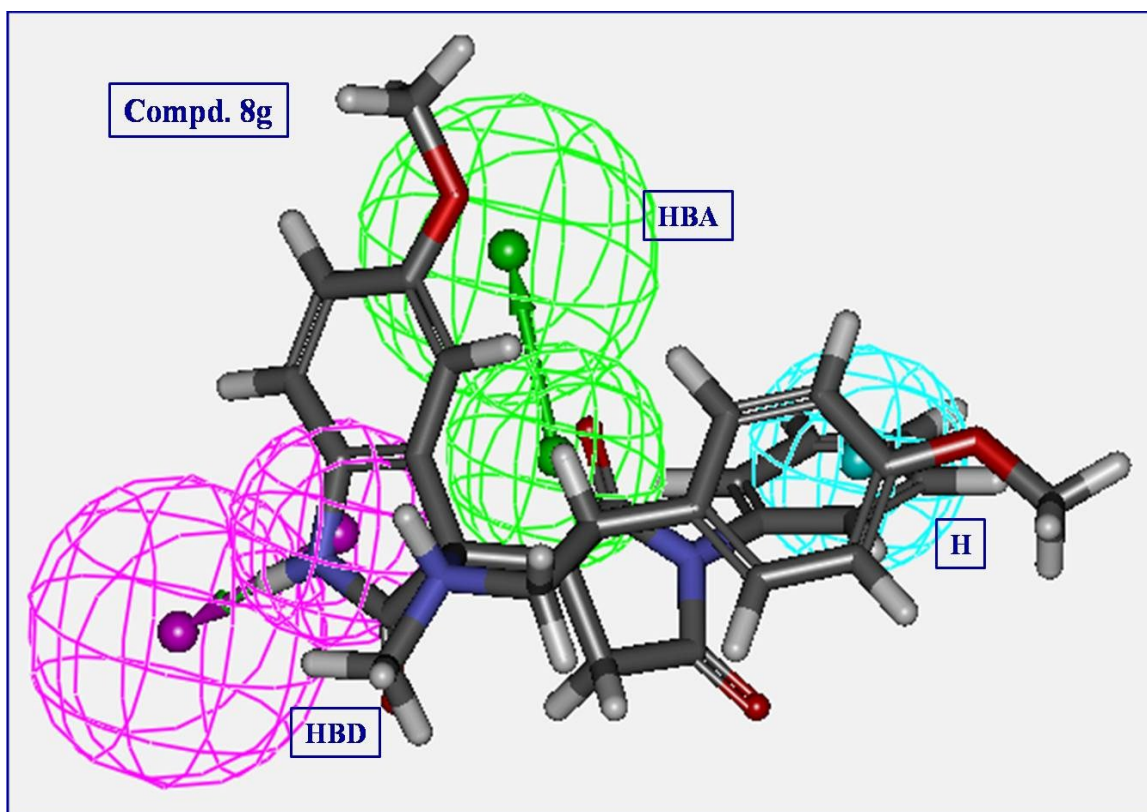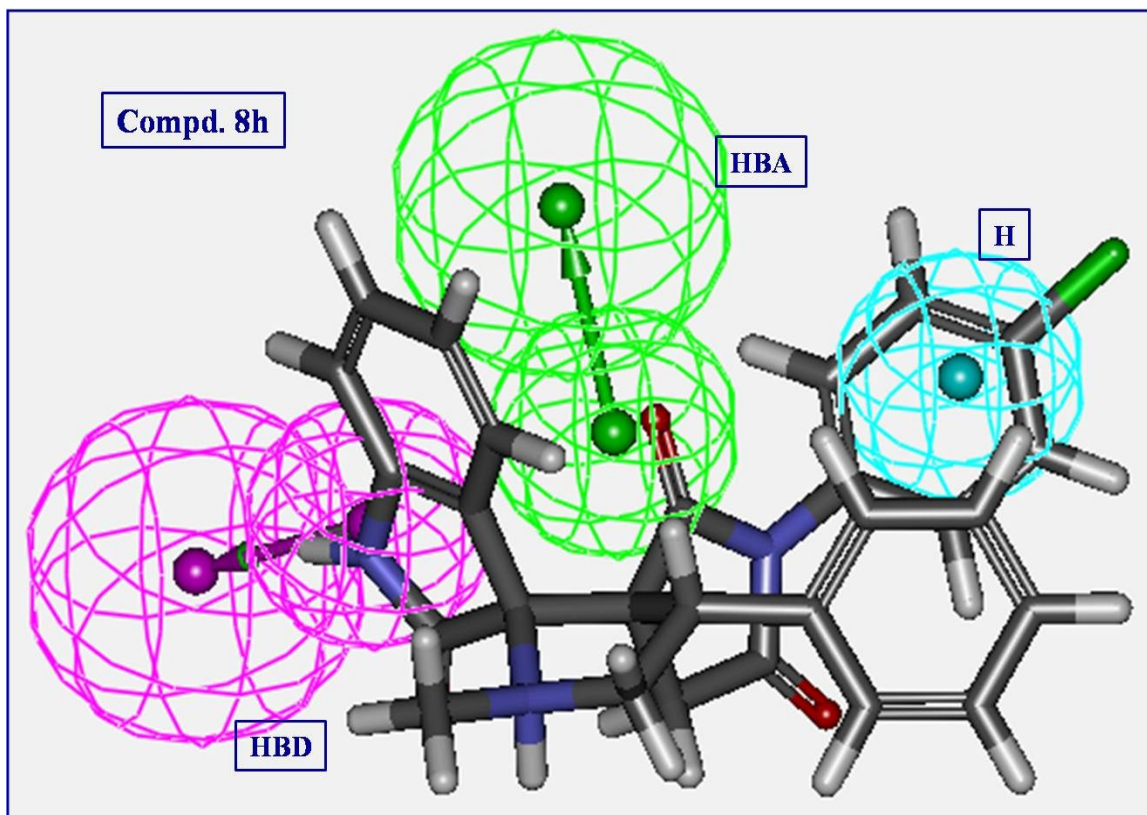

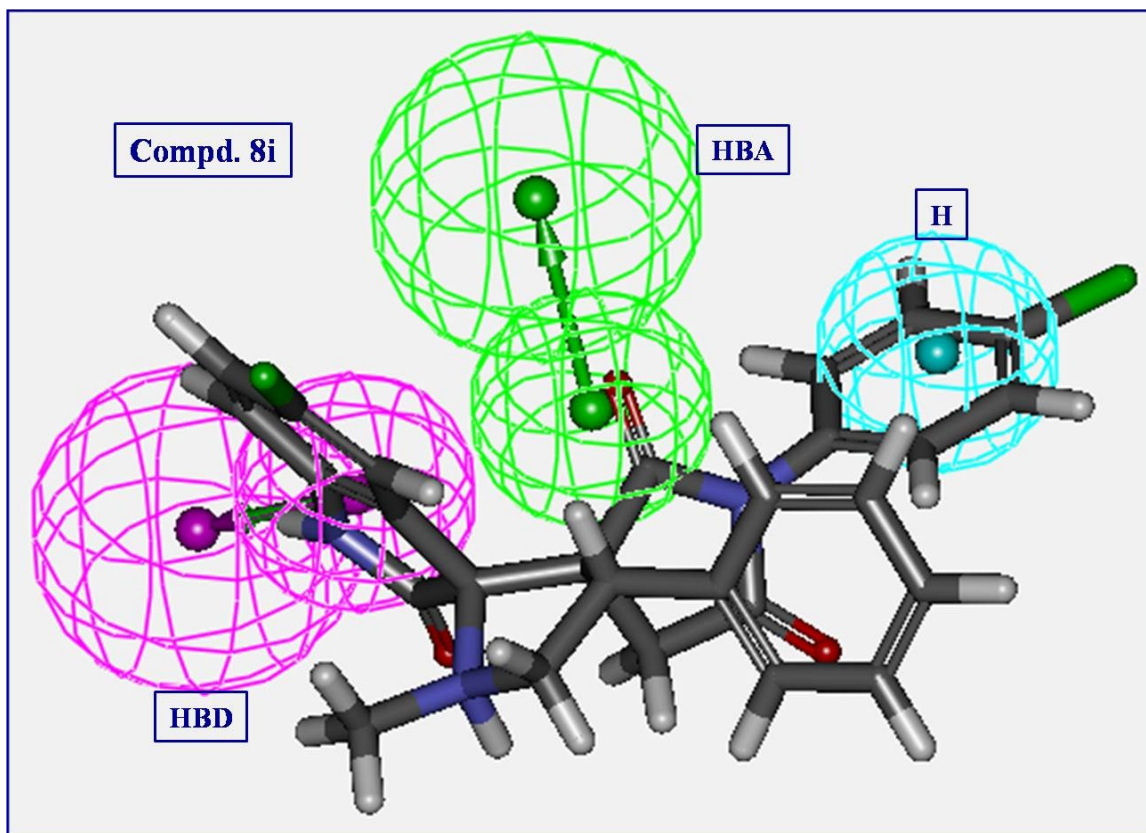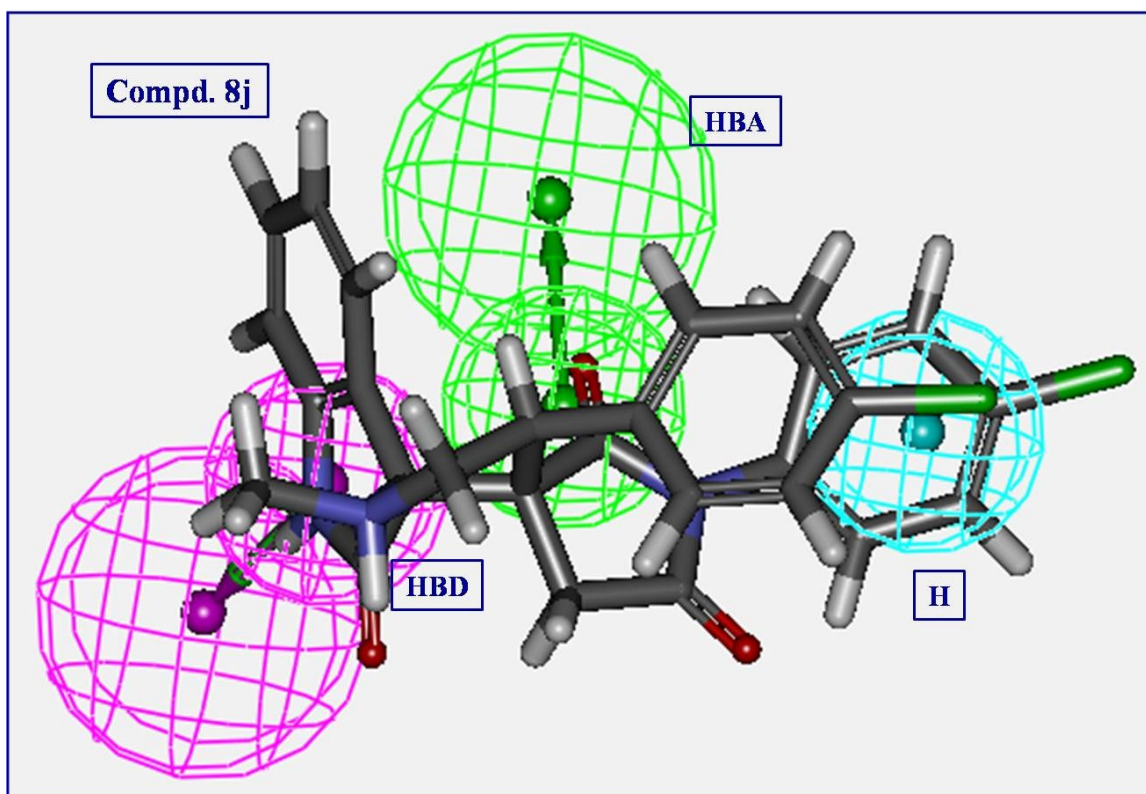



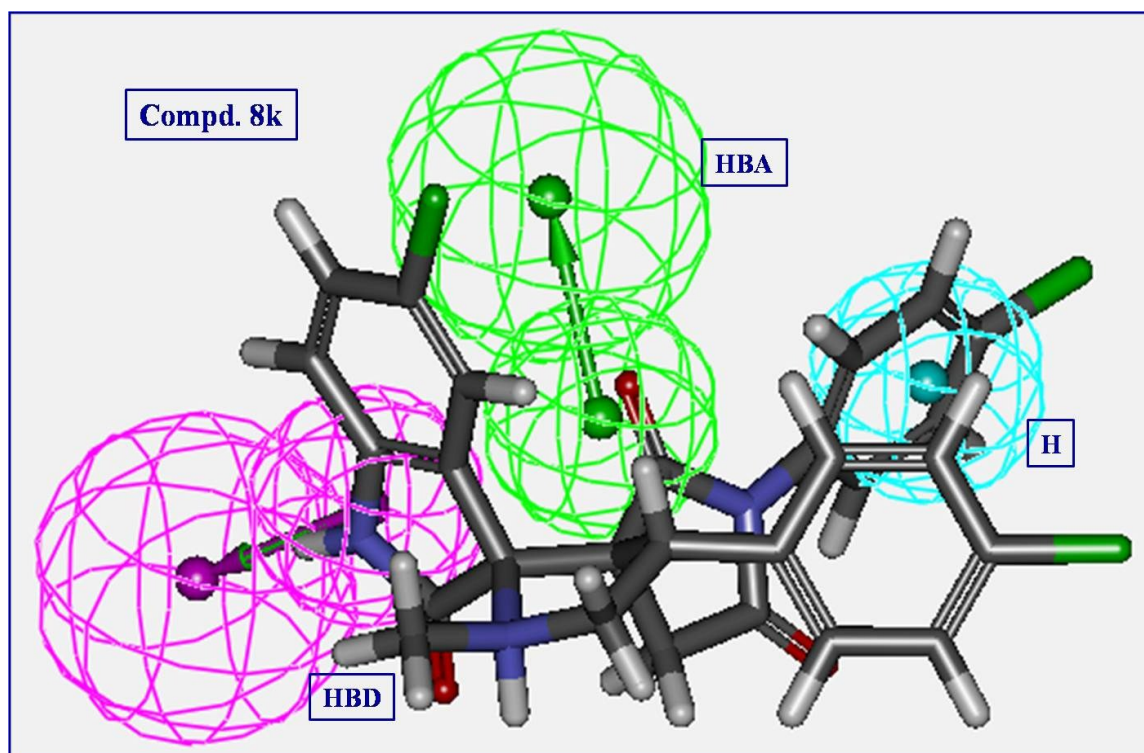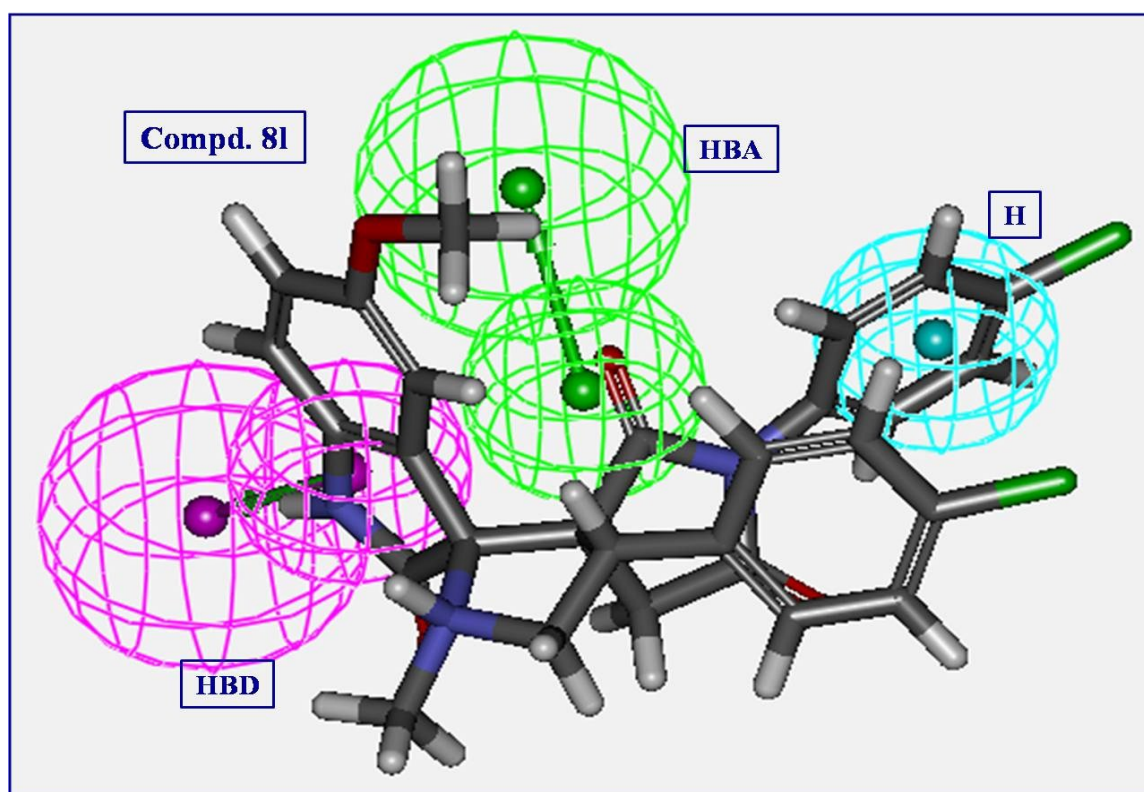

Fig. S45. 3D-pharmacophore model mapped on the tested compounds **8a–l** as BChE inhibitor.
